# Supplementary material for: Concise and collective total syntheses of 2,4-disubstituted furan-derived natural products from hydroxyoxetanyl ketones
Source: Royal Society of Chemistry journal article supplement (doi:10.1039/d3ob01924a), 2024-01-01

## Supplementary Information

---

### Concise and collective total syntheses of 2,4-disubstituted furan-derived natural products from hydroxyoxetanyl ketones

Shubhranshu Shekhar Sahoo,<sup>a,b</sup> Priyanka Kataria,<sup>a,b</sup> and Ravindar Kontham\*<sup>a,b</sup>

<sup>a</sup>Organic Chemistry Division, CSIR-National Chemical Laboratory, Dr. Homi Bhabha Road, Pune - 411008, India.

<sup>b</sup>Academy of Scientific and Industrial Research (AcSIR), Ghaziabad – 201002, India.

\*Email: [k.ravindar@ncl.res.in](mailto:k.ravindar@ncl.res.in), [konthamravindar@gmail.com](mailto:konthamravindar@gmail.com)

### Table of Contents

| S. No. | Contents                                                                                                                     | Page No. |
|--------|------------------------------------------------------------------------------------------------------------------------------|----------|
| 1.     | Comparison of <sup>1</sup> H and <sup>13</sup> C NMR data of natural and synthetic methylfuroic acid ( <b>1</b> ) (Table S1) | S2       |
| 2.     | Comparison of <sup>1</sup> H and <sup>13</sup> C NMR data of natural and synthetic rabdokitone A ( <b>2</b> ) (Table S2)     | S3       |
| 3.     | Comparison of <sup>1</sup> H and <sup>13</sup> C NMR data of natural and synthetic rabdokitone B ( <b>3</b> ) (Table S3)     | S4       |
| 4.     | Comparison of <sup>1</sup> H and <sup>13</sup> C NMR data of natural and synthetic paleofuran A ( <b>4</b> ) (Table S4)      | S5       |
| 5.     | Comparison of <sup>1</sup> H and <sup>13</sup> C NMR data of natural and synthetic paleofuran B ( <b>5</b> ) (Table S5)      | S6-S7    |
| 6.     | Comparison of <sup>1</sup> H and <sup>13</sup> C NMR data of natural and synthetic tournefolin C ( <b>6</b> ) (Table S6)     | S7-S8    |
| 7.     | <sup>1</sup> H and <sup>13</sup> C NMR spectra                                                                               | S9-S49   |

**Table S1: Comparison of  $^1\text{H}$  and  $^{13}\text{C}$  NMR data of natural and synthetic methylfuroic acid (**1**).**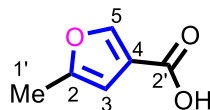

| Methylfuroic acid ( <b>1</b> ) (Natural)<br>in $\text{CDCl}_3$<br><i>Zhang et al.</i> |                                                 | Methylfuroic acid ( <b>1</b> ) (Synthetic)<br>in $\text{CDCl}_3$<br><i>Murphree et al.</i> |                                                 | Methylfuroic acid ( <b>1</b> ) (Synthetic)<br>in $\text{CDCl}_3$<br>This work |                                                 |                                                 |
|---------------------------------------------------------------------------------------|-------------------------------------------------|--------------------------------------------------------------------------------------------|-------------------------------------------------|-------------------------------------------------------------------------------|-------------------------------------------------|-------------------------------------------------|
|                                                                                       | $\delta\text{H}$ (mult, $J$ in Hz)<br>(500 MHz) | $\delta\text{C}$ (mult, $J$ in Hz)<br>(125 MHz)                                            | $\delta\text{H}$ (mult, $J$ in Hz)<br>(400 MHz) | $\delta\text{C}$ (mult, $J$ in Hz)<br>(100 MHz)                               | $\delta\text{H}$ (mult, $J$ in Hz)<br>(400 MHz) | $\delta\text{C}$ (mult, $J$ in Hz)<br>(101 MHz) |
| 2                                                                                     | -                                               | 154.06                                                                                     | -                                               | 154.01                                                                        | -                                               | 154.21                                          |
| 3                                                                                     | 6.33 (s, 1H)                                    | 105.55                                                                                     | 6.33 (s, 1H)                                    | 105.54                                                                        | 6.35 (s, 1H)                                    | 105.67                                          |
| 4                                                                                     | -                                               | 119.72                                                                                     | -                                               | 119.76                                                                        | -                                               | 119.40                                          |
| 5                                                                                     | 7.93 (s, 1H)                                    | 147.56                                                                                     | 7.94 (s, 1H)                                    | 147.58                                                                        | 7.96 (s, 1H)                                    | 147.75                                          |
| 1'                                                                                    | 2.29 (s, 3H)                                    | 13.35                                                                                      | 2.31 (s, 3H)                                    | 13.33                                                                         | 2.32 (s, 3H)                                    | 13.54                                           |
| 2'                                                                                    | -                                               | 168.41                                                                                     | -                                               | 168.39                                                                        | -                                               | 168.88                                          |

Table S2: Comparison of  $^1\text{H}$  and  $^{13}\text{C}$  NMR data of natural and synthetic rabdokitone A (2).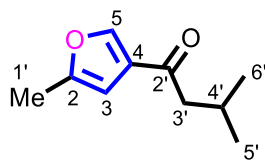

| Rabdokitone A (2) (Natural) in $\text{CDCl}_3$<br><i>Ma et al.</i> |                                                 | Rabdokitone A (2) (Synthetic)<br>in $\text{CDCl}_3$<br><i>Murphree et al.</i> |                                                 | Rabdokitone A (2) (Synthetic)<br>in $\text{CDCl}_3$<br>This work |                                                 |                                                    |
|--------------------------------------------------------------------|-------------------------------------------------|-------------------------------------------------------------------------------|-------------------------------------------------|------------------------------------------------------------------|-------------------------------------------------|----------------------------------------------------|
|                                                                    | $\delta\text{H}$ (mult, $J$ in Hz)<br>(400 MHz) | $\delta\text{C}$ (mult, $J$<br>in Hz)<br>(100 MHz)                            | $\delta\text{H}$ (mult, $J$ in Hz)<br>(400 MHz) | $\delta\text{C}$ (mult, $J$<br>in Hz)<br>(100 MHz)               | $\delta\text{H}$ (mult, $J$ in Hz)<br>(400 MHz) | $\delta\text{C}$ (mult,<br>$J$ in Hz)<br>(101 MHz) |
| 2                                                                  | -                                               | 148.6                                                                         | -                                               | 154.2                                                            | -                                               | 154.3                                              |
| 3                                                                  | 6.29 (s, 1H)                                    | 115.6                                                                         | 6.33 (s, 1H)                                    | 104.5                                                            | 6.34 (s, 1H)                                    | 104.5                                              |
| 4                                                                  | -                                               | 129.8                                                                         | -                                               | 129.3                                                            | -                                               | 129.3                                              |
| 5                                                                  | 7.31 (s, 1H)                                    | 143.7                                                                         | 7.94 (s, 1H)                                    | 145.8                                                            | 7.84 (s, 1H)                                    | 145.9                                              |
| 1'                                                                 | 2.31 (s, 3H)                                    | 11.6                                                                          | 2.29 (s, 3H)                                    | 13.5                                                             | 2.30 (s, 3H)                                    | 13.5                                               |
| 2'                                                                 | -                                               | 191.3                                                                         | -                                               | 195.5                                                            | -                                               | 195.5                                              |
| 3'                                                                 | 2.63 (d, 2H)                                    | 24.7                                                                          | 2.54 (d, 2H)                                    | 25.6                                                             | 2.55 (d, 7.0, 2H)                               | 25.6                                               |
| 4'                                                                 | 2.20 (m, 1H)                                    | 47.7                                                                          | 2.15-2.28 (m, 1H)                               | 49.3                                                             | 2.27-2.20 (m, 1H)                               | 49.4                                               |
| 5'; 6'                                                             | 0.90 (d, 6H)                                    | 22.5                                                                          | 0.95 (d, 6H)                                    | 22.8                                                             | 0.96 (d, 6.6, 6H)                               | 22.9                                               |

Table S3: Comparison of  $^1\text{H}$  and  $^{13}\text{C}$  NMR data of natural and synthetic rabdoketone B (**3**).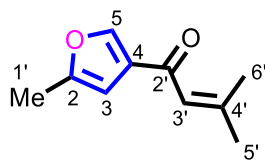

| Rabdoketone B ( <b>3</b> ) (Natural) in $\text{CDCl}_3$<br>Ma <i>et al.</i> |                                                 |                                                 | Rabdoketone B ( <b>3</b> ) (Synthetic) in $\text{CDCl}_3$<br>This work |                                                 |
|-----------------------------------------------------------------------------|-------------------------------------------------|-------------------------------------------------|------------------------------------------------------------------------|-------------------------------------------------|
|                                                                             | $\delta\text{H}$ (mult, $J$ in Hz)<br>(400 MHz) | $\delta\text{C}$ (mult, $J$ in Hz)<br>(100 MHz) | $\delta\text{H}$ (mult, $J$ in Hz)<br>(400 MHz)                        | $\delta\text{C}$ (mult, $J$ in Hz)<br>(101 MHz) |
| 2                                                                           | -                                               | 149.3                                           | -                                                                      | 154.1                                           |
| 3                                                                           | 6.30 (s, 1H)                                    | 115.7                                           | 6.38 (s, 1H)                                                           | 104.9                                           |
| 4                                                                           | -                                               | 129.9                                           | -                                                                      | 130.6                                           |
| 5                                                                           | 7.31 (s, 1H)                                    | 143.1                                           | 7.84 (s, 1H)                                                           | 145.1                                           |
| 1'                                                                          | 2.36 (s, 3H)                                    | 11.9                                            | 2.30 (s, 3H)                                                           | 13.6                                            |
| 2'                                                                          | -                                               | 181.5                                           | -                                                                      | 185.7                                           |
| 3'                                                                          | 6.72 (s, 1H)                                    | 120.6                                           | 6.40-6.39 (m, 1H)                                                      | 121.8                                           |
| 4'                                                                          | -                                               | 156.4                                           | -                                                                      | 156.1                                           |
| 5'                                                                          | 1.93 (s, 3H)                                    | 20.8                                            | 1.95 (s, 1H)                                                           | 21.2                                            |
| 6'                                                                          | 2.20 (s, 3H)                                    | 28.0                                            | 2.22 (s, 1H)                                                           | 28.0                                            |

Table S4: Comparison of  $^1\text{H}$  and  $^{13}\text{C}$  NMR data of natural and synthetic paleofuran A (4).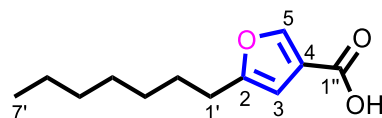

| Paleofuran A (4) (Natural) in DMSO- $d_6$<br>Klapper <i>et al.</i> |                                                 | Paleofuran A (4) (Synthetic)<br>in $\text{CDCl}_3$<br>Klapper <i>et al.</i> |                                                 | Paleofuran A (4) (Synthetic)<br>in $\text{CDCl}_3$<br>This work |                                                 |                                                 |
|--------------------------------------------------------------------|-------------------------------------------------|-----------------------------------------------------------------------------|-------------------------------------------------|-----------------------------------------------------------------|-------------------------------------------------|-------------------------------------------------|
|                                                                    | $\delta\text{H}$ (mult, $J$ in Hz)<br>(600 MHz) | $\delta\text{C}$ (mult, $J$ in Hz)<br>(150 MHz)                             | $\delta\text{H}$ (mult, $J$ in Hz)<br>(300 MHz) | $\delta\text{C}$ (mult, $J$ in Hz)<br>(75 MHz)                  | $\delta\text{H}$ (mult, $J$ in Hz)<br>(400 MHz) | $\delta\text{C}$ (mult, $J$ in Hz)<br>(101 MHz) |
| 2                                                                  | -                                               | 158.7                                                                       | -                                               | 158.7                                                           | -                                               | 158.7                                           |
| 3                                                                  | 6.35 (s, 1H)                                    | 104.9                                                                       | 6.35 (s, 1H)                                    | 104.9                                                           | 6.35 (s, 1H)                                    | 104.9                                           |
| 4                                                                  | -                                               | 119.2                                                                       | -                                               | 119.2                                                           | -                                               | 119.2                                           |
| 5                                                                  | 7.96 (s, 1H)                                    | 147.7                                                                       | 7.96 (s, 1H)                                    | 147.7                                                           | 7.97 (s, 1H)                                    | 147.7                                           |
| 1'                                                                 | 2.62 (t, 7.5, 2H)                               | 27.9                                                                        | 2.62 (t, 6.2, 2H)                               | 27.9                                                            | 2.62 (t, 7.5, 2H)                               | 27.9                                            |
| 2'                                                                 | 1.64 (p, 7.2, 2H)                               | 27.8                                                                        | 1.59–1.69 (m, 2H)                               | 27.8                                                            | 1.61–1.68 (m, 2H)                               | 27.8                                            |
| 3'                                                                 | 1.33 (m, 2H)                                    | 29.1                                                                        | 1.27–1.33 (m, 8H)                               | 29.1                                                            | 1.26–1.38(m, 8H)                                | 29.1                                            |
| 4'                                                                 | 1.33 (m, 2H)                                    | 29.1                                                                        |                                                 | 29.1                                                            |                                                 | 29.1                                            |
| 5'                                                                 | 1.29 (m, 2H)                                    | 31.9                                                                        |                                                 | 31.9                                                            |                                                 | 31.9                                            |
| 6'                                                                 | 1.30 (m, 2H)                                    | 22.8                                                                        |                                                 | 22.8                                                            |                                                 | 22.8                                            |
| 7'                                                                 | 0.89 (t, 6.6, 3H)                               | 14.2                                                                        | 0.89 (t, 5.2, 3H)                               | 14.2                                                            | 0.88 (t, 6.63, 3 H)                             | 14.2                                            |
| 1''                                                                | -                                               | 169.0                                                                       | -                                               | 169.0                                                           | -                                               | 169.4                                           |

Table S5: Comparison of  $^1\text{H}$  and  $^{13}\text{C}$  NMR data of natural and synthetic paleofuran B (5).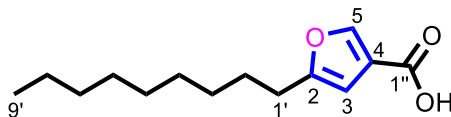

| Paleofuran B (5) (Natural) in DMSO-d <sub>6</sub><br>Klapper <i>et al.</i> |                                                      |                                                      | Paleofuran B (5) (Synthetic) in CDCl <sub>3</sub><br>This work |                                                      |
|----------------------------------------------------------------------------|------------------------------------------------------|------------------------------------------------------|----------------------------------------------------------------|------------------------------------------------------|
|                                                                            | $\delta\text{H}$ (mult, <i>J</i> in Hz)<br>(600 MHz) | $\delta\text{C}$ (mult, <i>J</i> in Hz)<br>(150 MHz) | $\delta\text{H}$ (mult, <i>J</i> in Hz)<br>(400 MHz)           | $\delta\text{C}$ (mult, <i>J</i> in Hz)<br>(101 MHz) |
| 2                                                                          | -                                                    | 158.7                                                | -                                                              | 158.7                                                |
| 3                                                                          | 6.35 (s, 1H)                                         | 104.9                                                | 6.35 (s, 1H)                                                   | 104.9                                                |
| 4                                                                          | -                                                    | 119.2                                                | -                                                              | 119.1                                                |
| 5                                                                          | 7.96 (s, 1H)                                         | 147.5                                                | 7.96 (s, 1H)                                                   | 147.6                                                |
| 1'                                                                         | 2.62 (t, 7.5, 2H)                                    | 28.0                                                 | 2.62 (t, <i>J</i> = 7.63 Hz, 2H)                               | 27.9                                                 |
| 2'                                                                         | 1.64 (p, 7.2, 2H)                                    | 27.8                                                 | 1.64 (p, <i>J</i> = 7.38 Hz, 2H)                               | 27.8                                                 |
| 3'                                                                         | 1.33 (m, 2H)                                         | 29.4                                                 | 1.25 (m, 12H)                                                  | 29.4                                                 |
| 4'                                                                         | 1.27 (m, 2H)                                         | 29.2/29.5/29.6                                       |                                                                | 29.2/29.4/29.6                                       |
| 5'                                                                         | 1.27 (m, 2H)                                         | 29.2/29.5/29.6                                       |                                                                | 29.2/29.4/29.6                                       |
| 6'                                                                         | 1.27 (m, 2H)                                         | 29.2/29.5/29.6                                       |                                                                | 29.2/29.4/29.6                                       |
| 7'                                                                         | 1.27 (m, 2H)                                         | 32.0                                                 |                                                                | 32.0                                                 |
| 8'                                                                         | 1.29 (m, 2H)                                         | 22.8                                                 |                                                                | 22.8                                                 |

|     |                   |       |                            |       |
|-----|-------------------|-------|----------------------------|-------|
| 9'  | 0.88 (t, 6.8, 3H) | 14.2  | 0.88 (t, $J = 6.7$ Hz, 3H) | 14.3  |
| 1'' | -                 | 167.8 | -                          | 168.2 |

**Table S6: Comparison of  $^1\text{H}$  and  $^{13}\text{C}$  NMR data of natural and synthetic tournefolin C (6).**

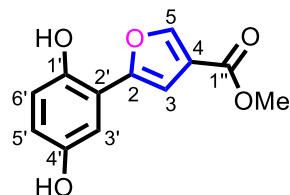

| Tournefolin C (6) (Natural) in DMSO- $d_6$<br>Lin <i>et al.</i> |                                                 | Tournefolin C (6) (Synthetic) in DMSO- $d_6$<br>This work |                                                 |                                                 |
|-----------------------------------------------------------------|-------------------------------------------------|-----------------------------------------------------------|-------------------------------------------------|-------------------------------------------------|
|                                                                 | $\delta\text{H}$ (mult, $J$ in Hz)<br>(300 MHz) | $\delta\text{C}$ (mult, $J$ in Hz)<br>(75 MHz)            | $\delta\text{H}$ (mult, $J$ in Hz)<br>(400 MHz) | $\delta\text{C}$ (mult, $J$ in Hz)<br>(101 MHz) |
| 2                                                               | -                                               | 151.7                                                     | -                                               | 151.7                                           |
| 3                                                               | 7.08 (s, 1H)                                    | 107.9                                                     | 7.14 (d, 0.75, 1H)                              | 108.0                                           |
| 4                                                               | -                                               | 120.1                                                     | -                                               | 120.2                                           |
| 5                                                               | 8.35 (s, 1H)                                    | 146.4                                                     | 8.39 (s, 1H)                                    | 146.6                                           |
| 1'                                                              | -                                               | 146.4                                                     | -                                               | 146.5                                           |
| 2'                                                              | -                                               | 116.2                                                     | -                                               | 116.2                                           |
| 3'                                                              | 7.06 (d, 2.0, 1H)                               | 110.8                                                     | 7.07 (d, 2.8, 1H)                               | 110.8                                           |
| 4'                                                              | -                                               | 149.8                                                     | -                                               | 149.9                                           |

|     |                         |       |                         |       |
|-----|-------------------------|-------|-------------------------|-------|
| 5'  | 6.59 (dd, 8.7, 2.0, 1H) | 116.9 | 6.60 (dd, 8.7, 2.8, 1H) | 117.0 |
| 6'  | 6.77 (d, 8.7, 1H)       | 116.0 | 6.79 (d, 8.7, 1H)       | 116.1 |
| 1'' | -                       | 162.9 | -                       | 163.0 |
| OMe | 3.78 (s, 1H)            | 51.4  | 3.79 (s, 1H)            | 51.5  |
| OH  | 8.86 (s, 1H)            | -     | 8.93 (s, 1H)            | -     |
| OH  | 9.53 (s, 1H)            | -     | 9.62 (s, 1H)            | -     |



# **$^1\text{H}$ and $^{13}\text{C}$ NMR spectra**

**$^1\text{H}$  NMR spectrum of 1-(3-hydroxyoxetan-3-yl)propan-2-one (11):**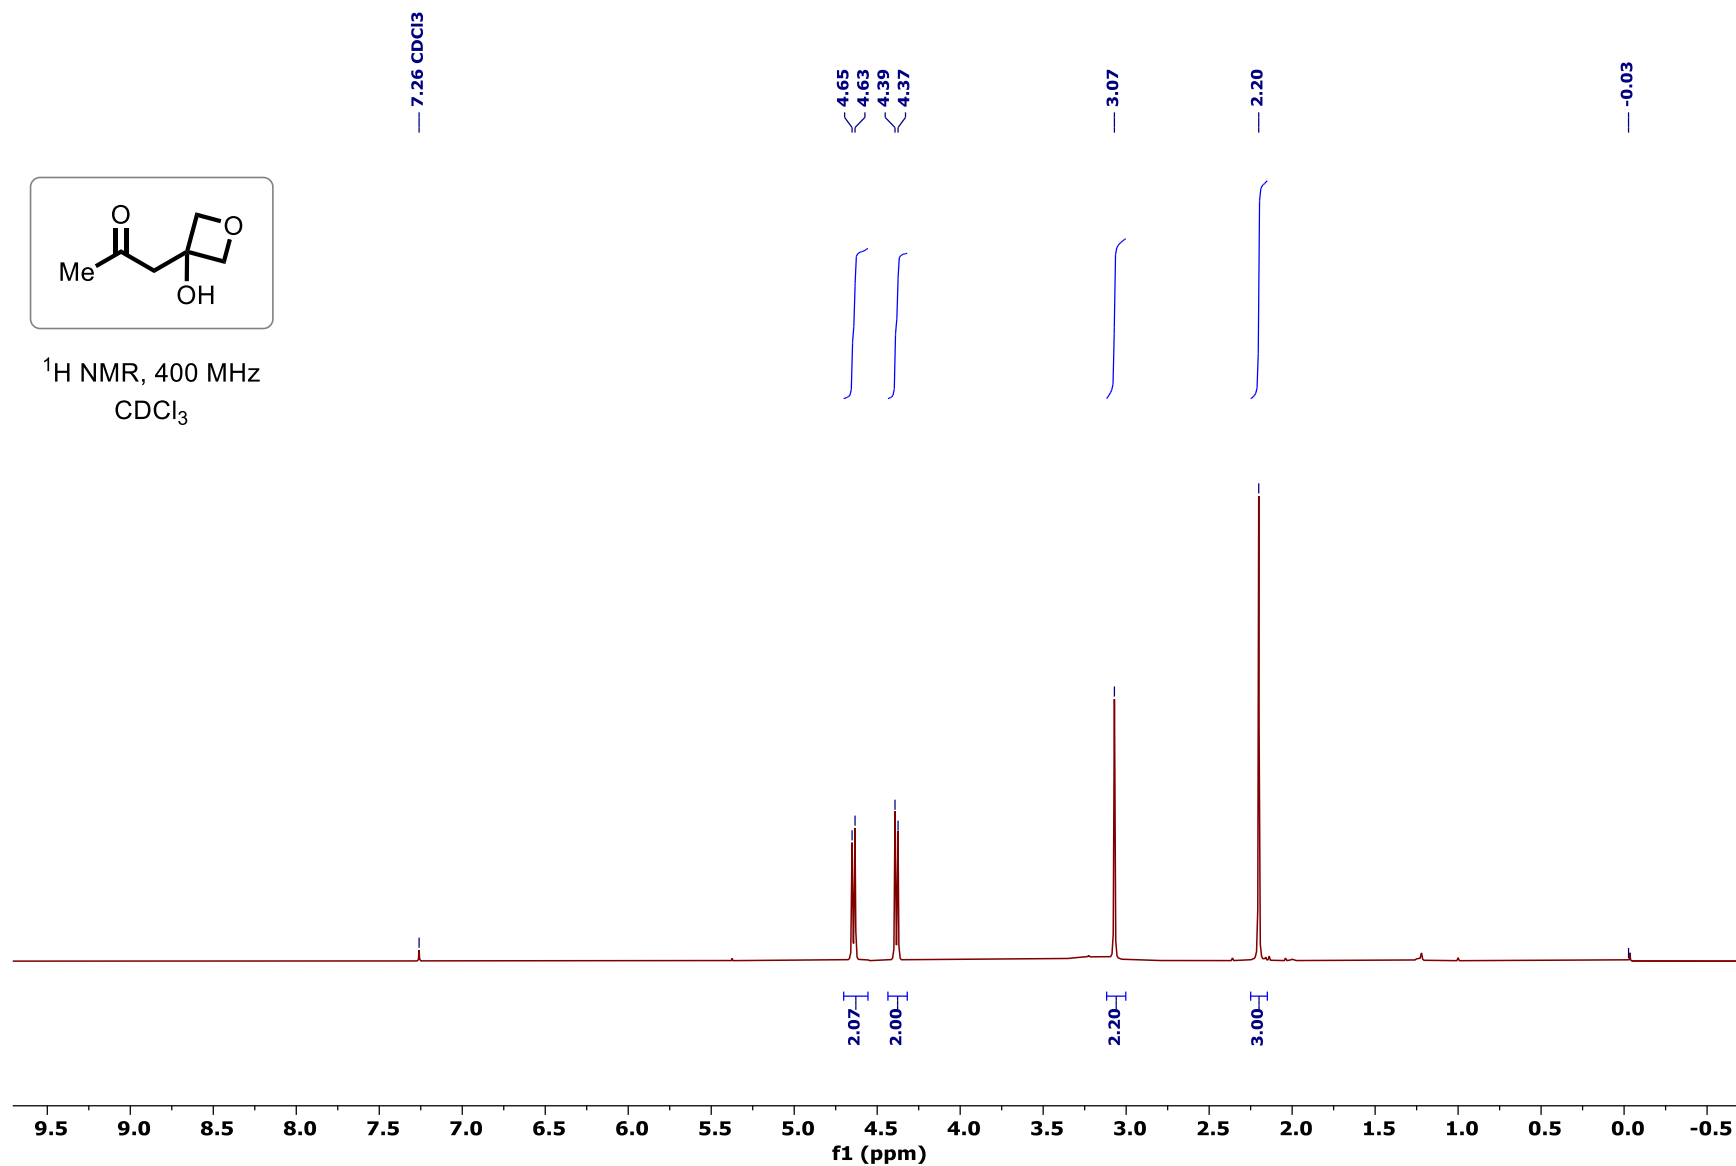

**$^{13}\text{C}$  NMR spectrum of 1-(3-hydroxyoxetan-3-yl)propan-2-one (11):**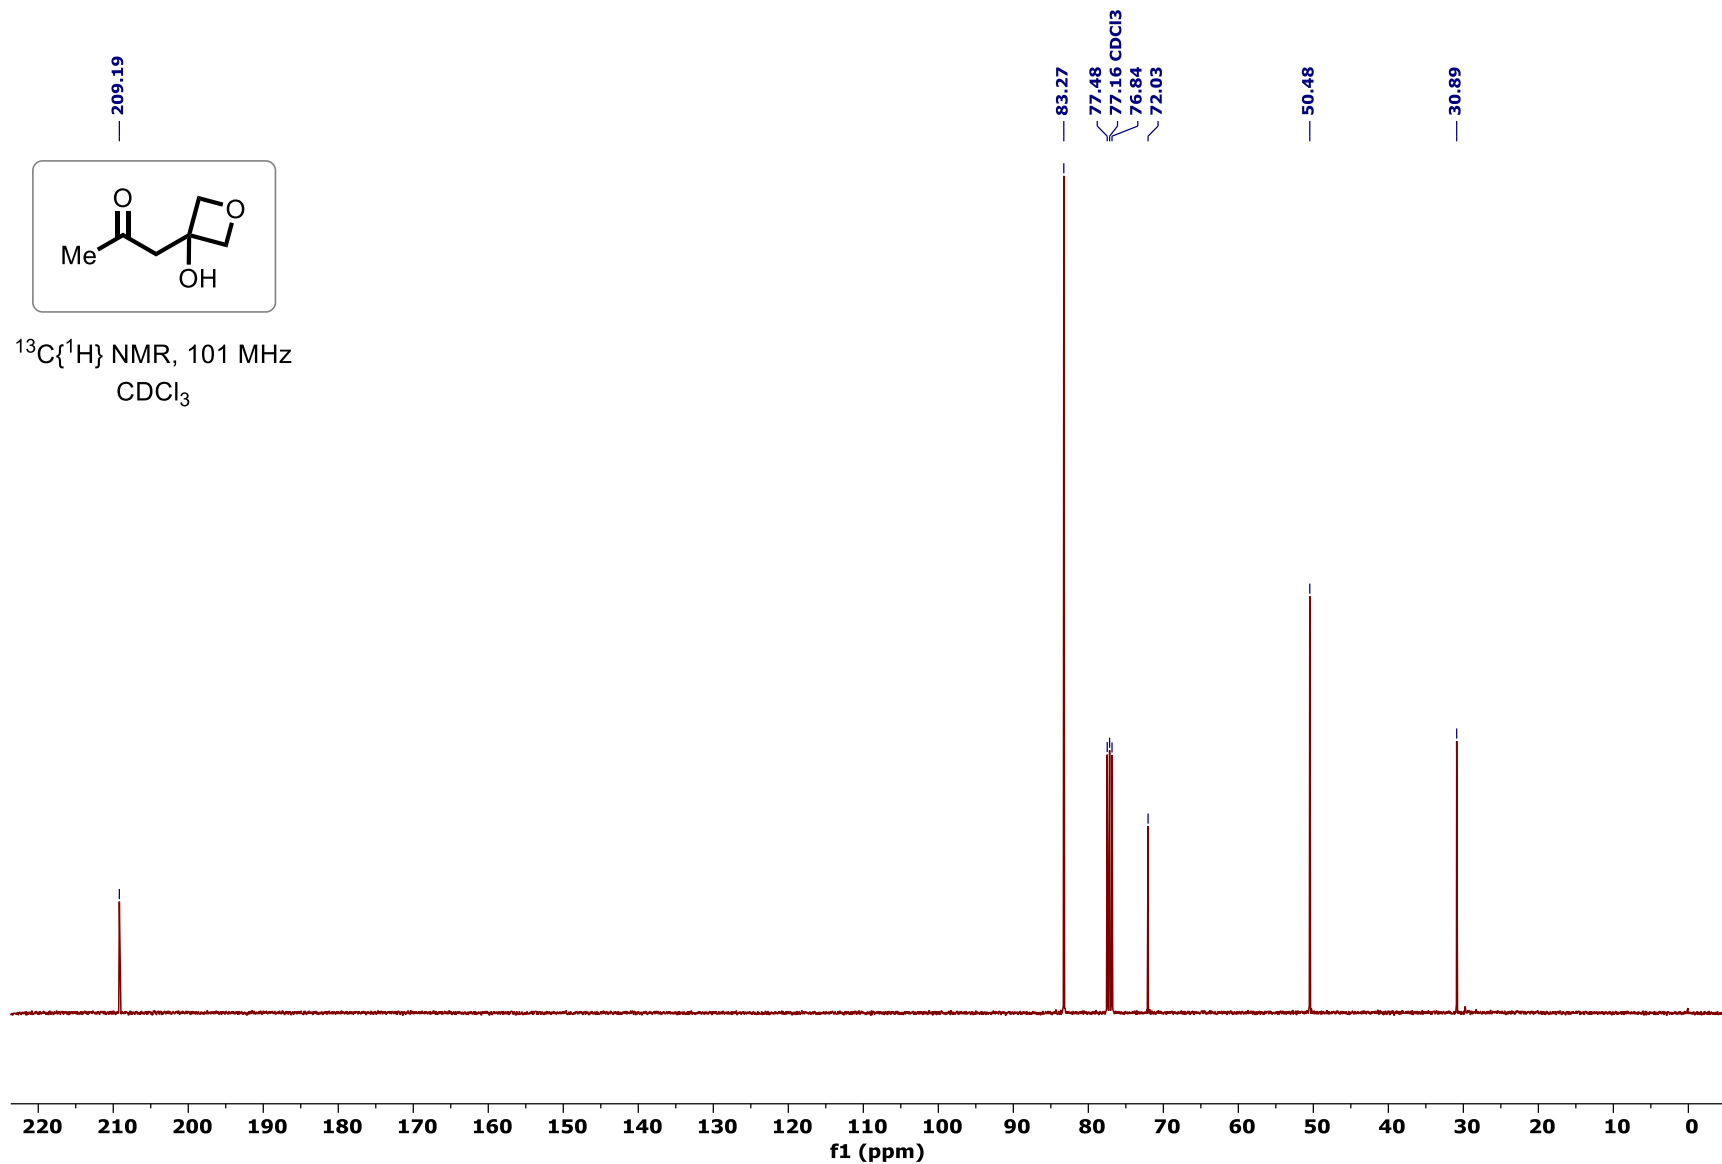

**<sup>1</sup>H NMR spectrum of (5-methylfuran-3-yl)methanol (12):**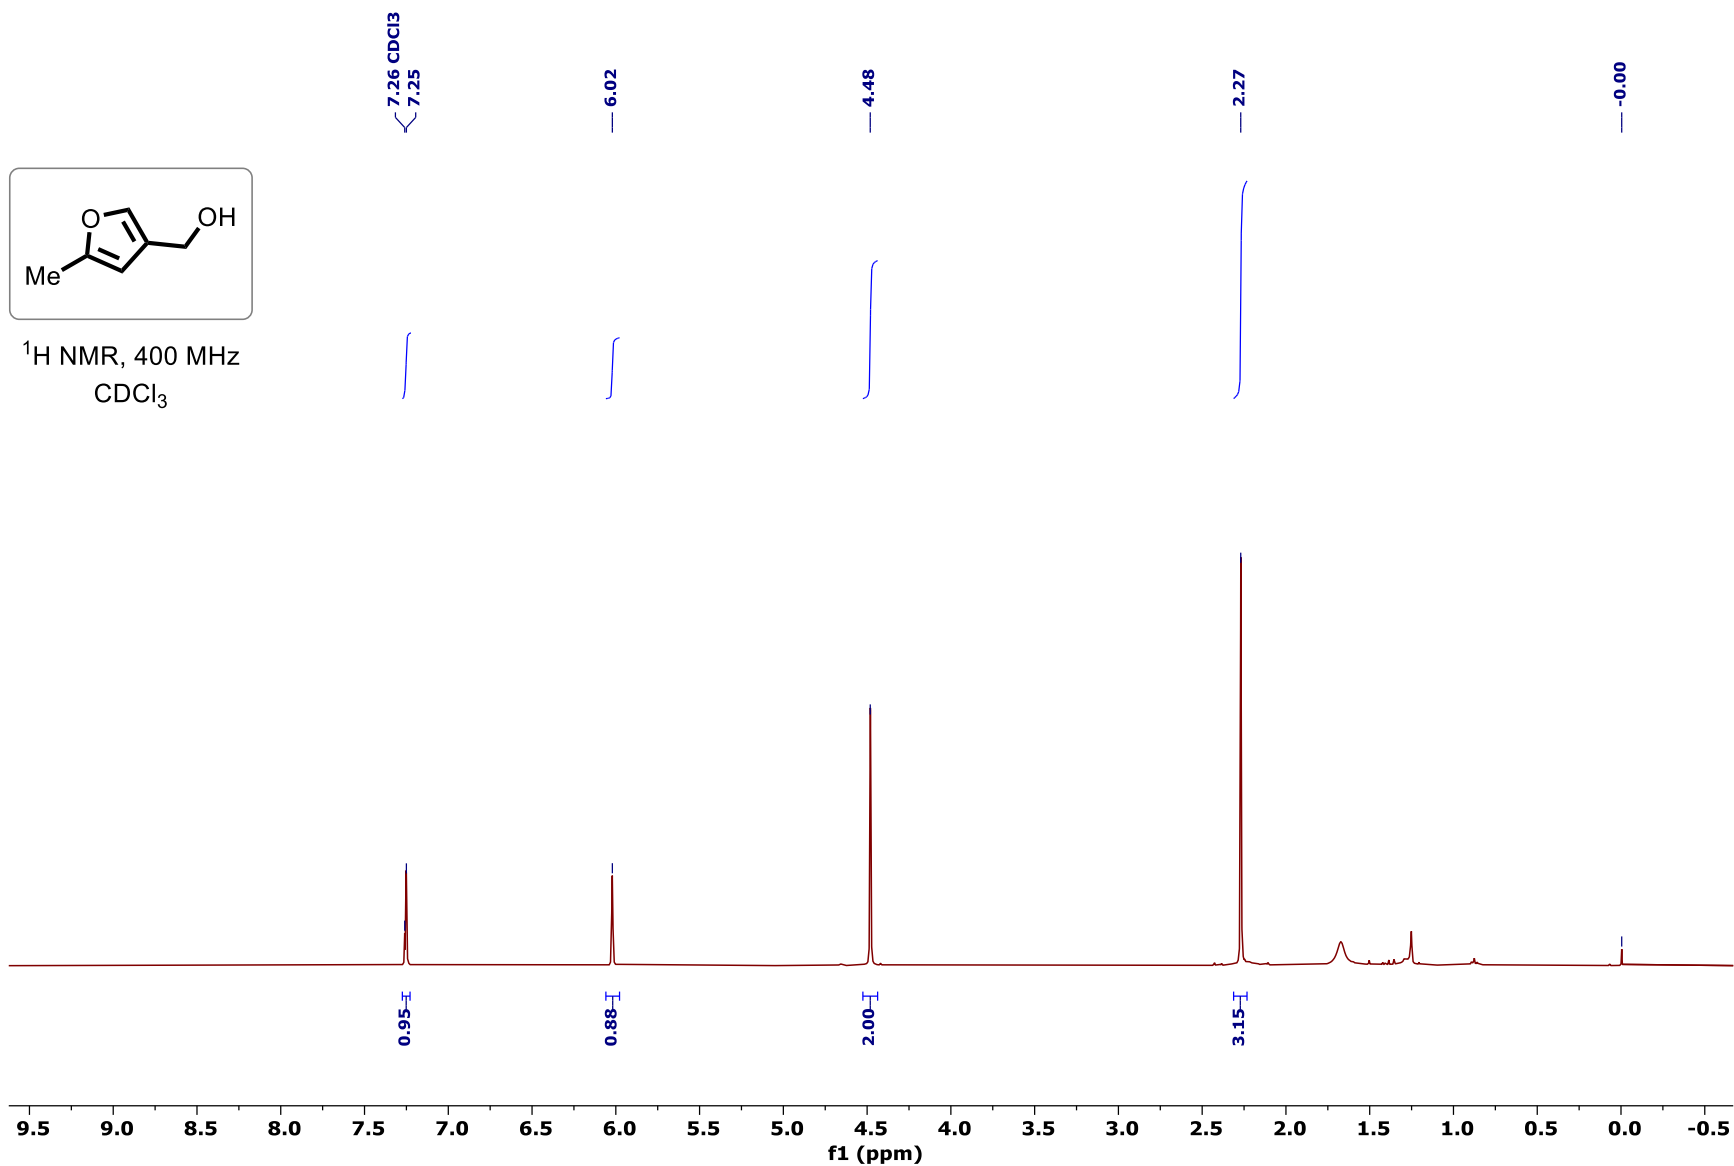

$^{13}\text{C}$  NMR spectrum of (5-methylfuran-3-yl)methanol (12):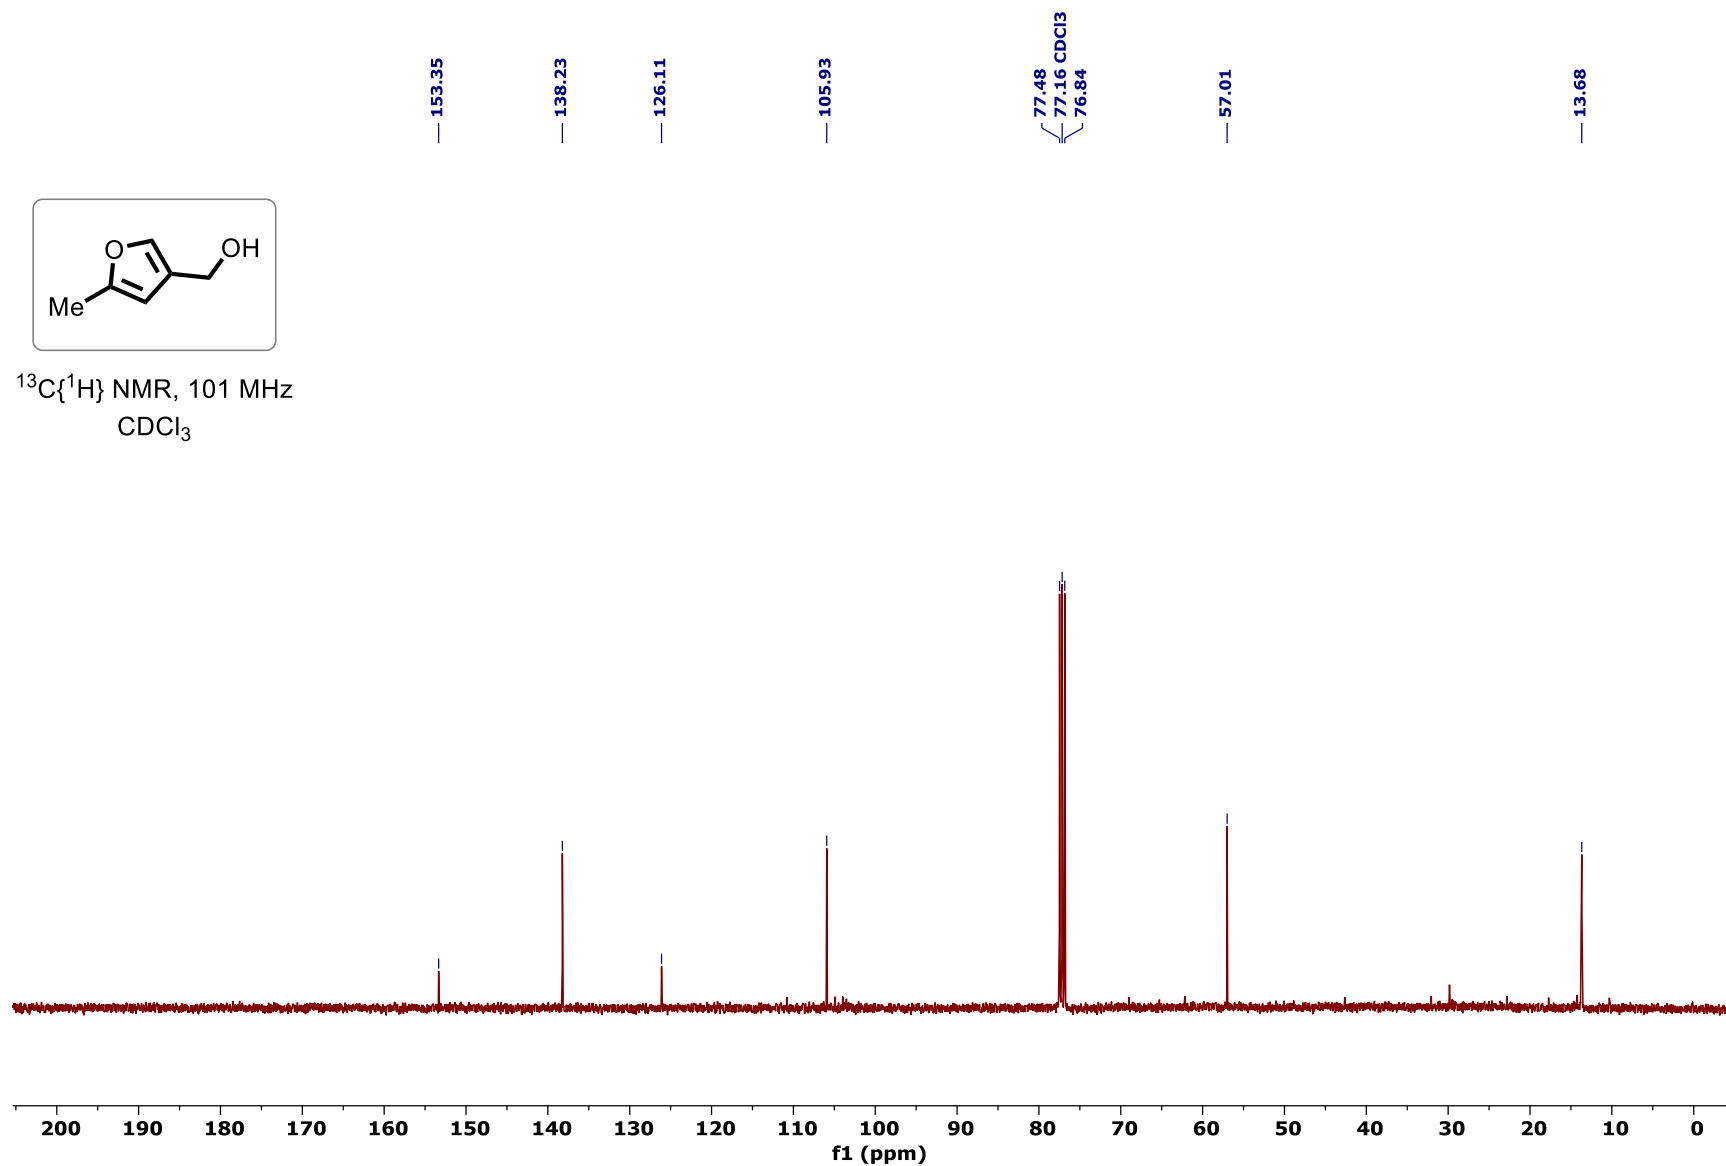

**$^1\text{H}$  NMR spectrum of methylfuroic acid (1):**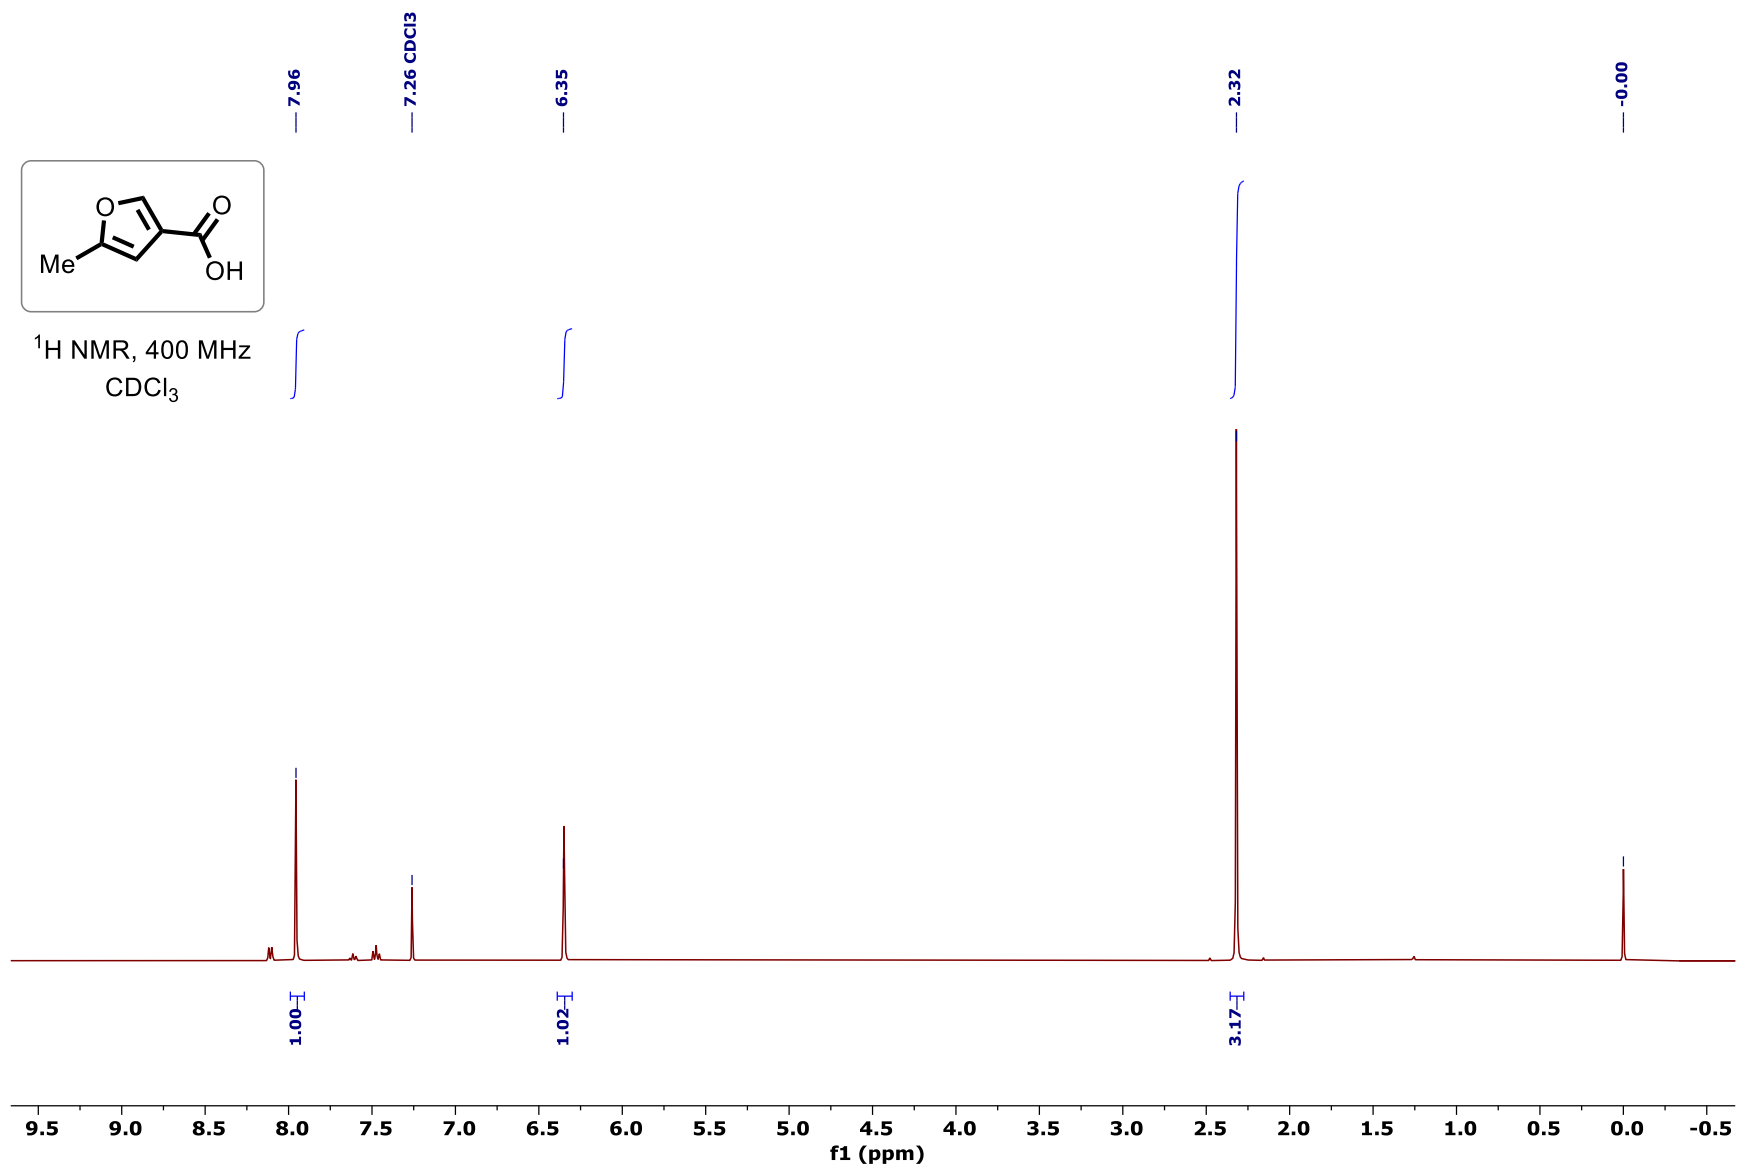

$^{13}\text{C}$  NMR spectrum of methylfuroic acid (1):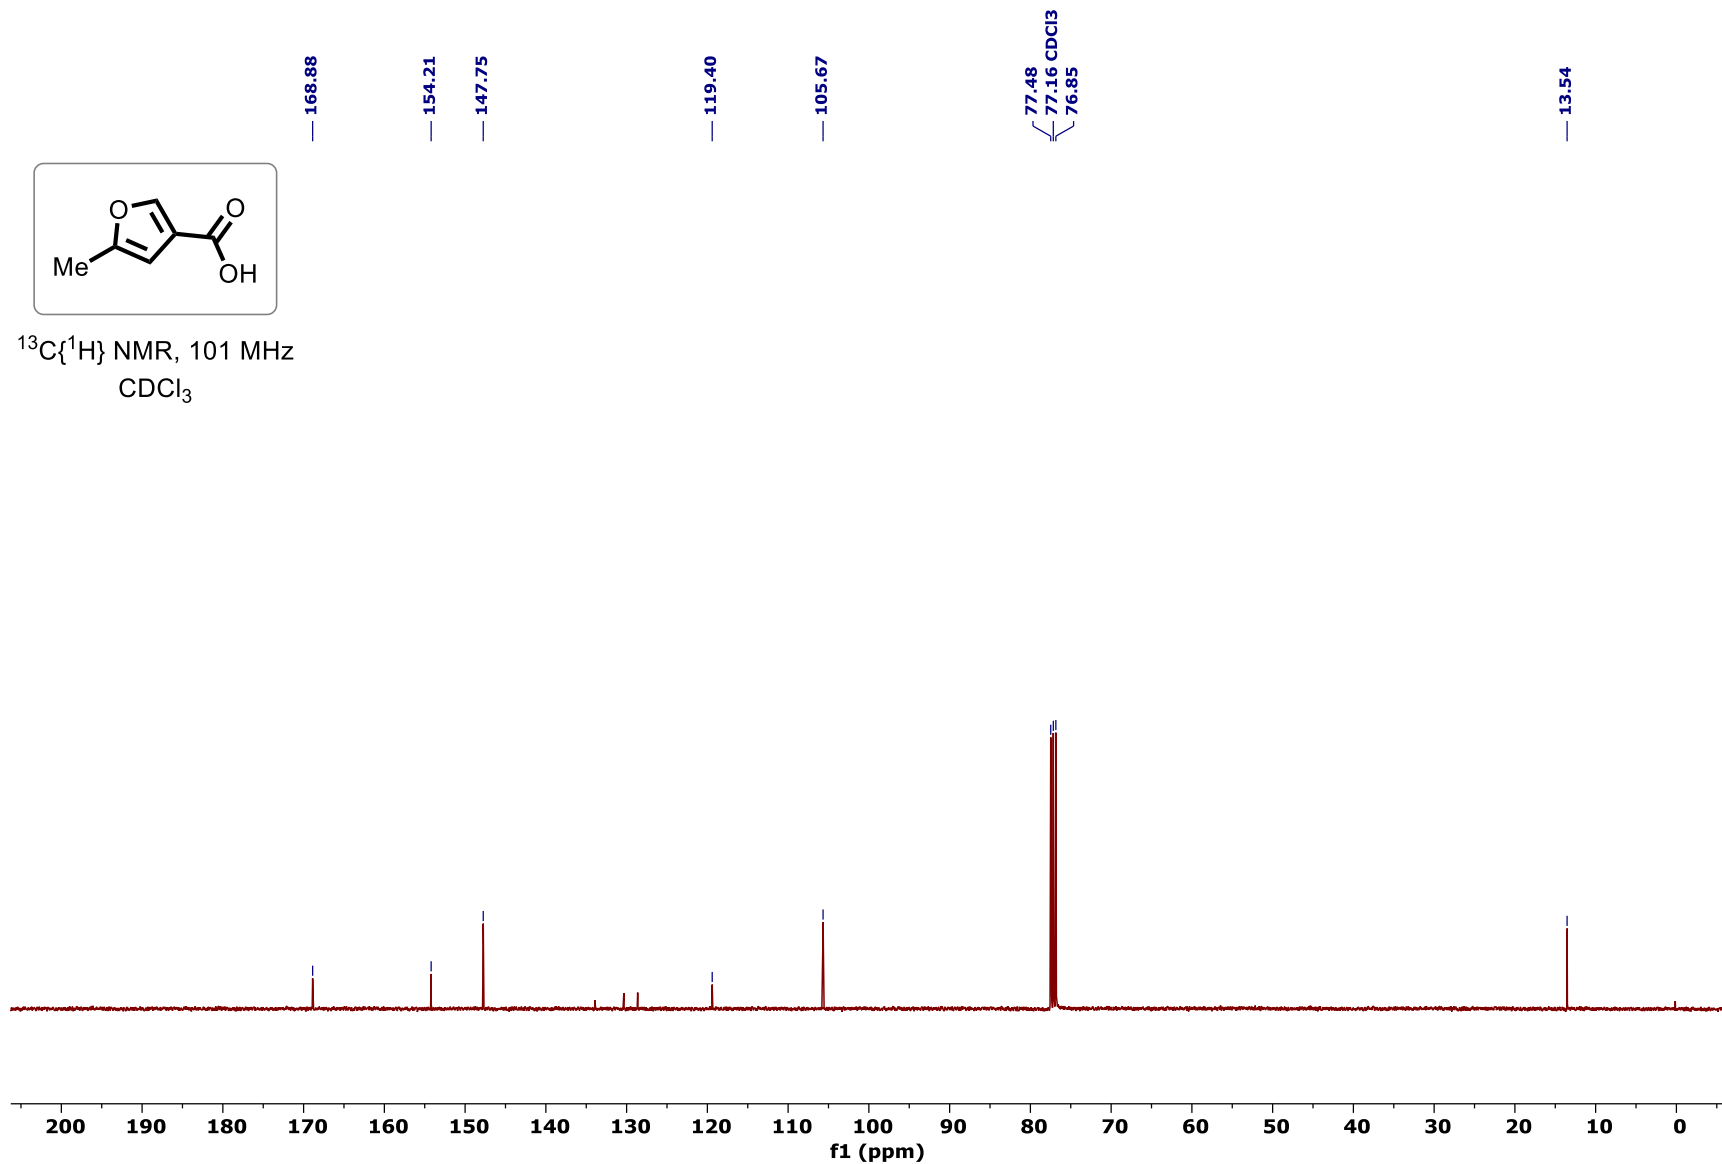

**<sup>1</sup>H NMR spectrum of 5-methylfuran-3-carbaldehyde (14):**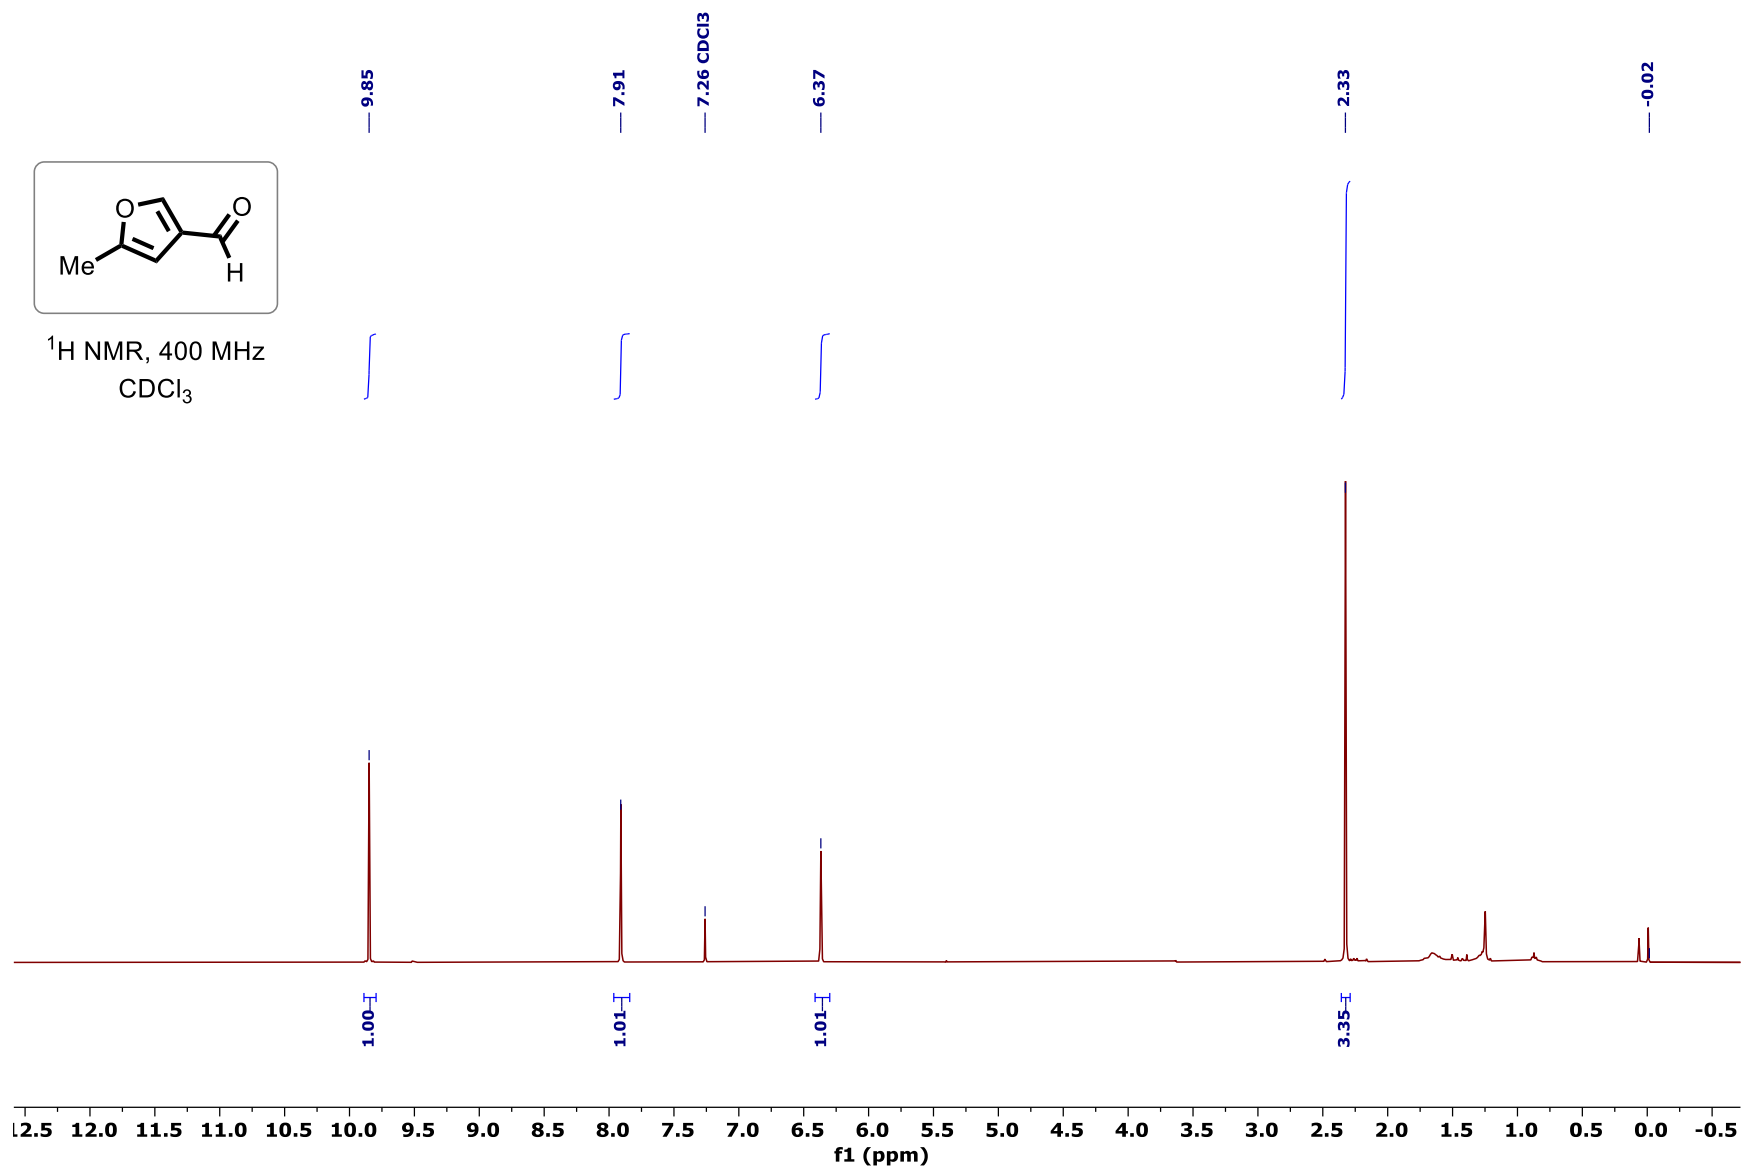



$^{13}\text{C}$  NMR spectrum of 5-methylfuran-3-carbaldehyde (14):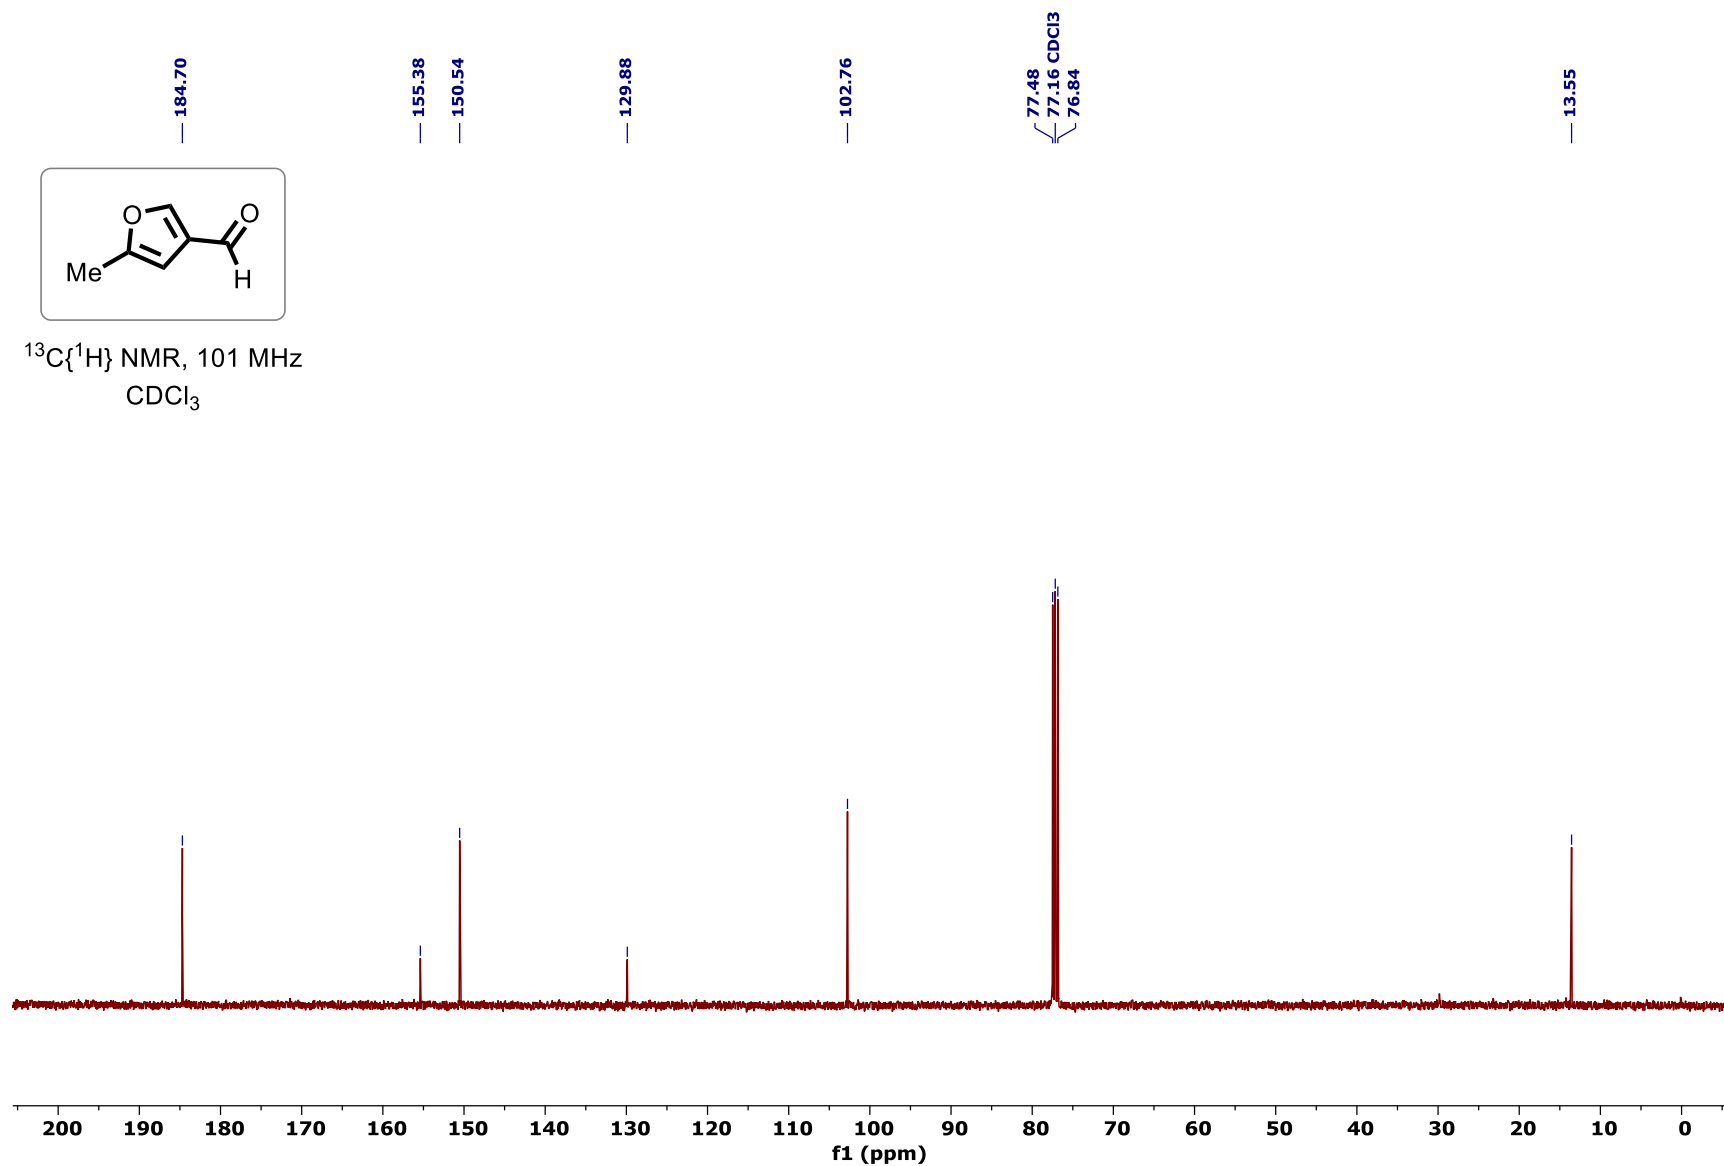

**<sup>1</sup>H NMR spectrum of 3-methyl-1-(5-methylfuran-3-yl)butan-1-ol (16):**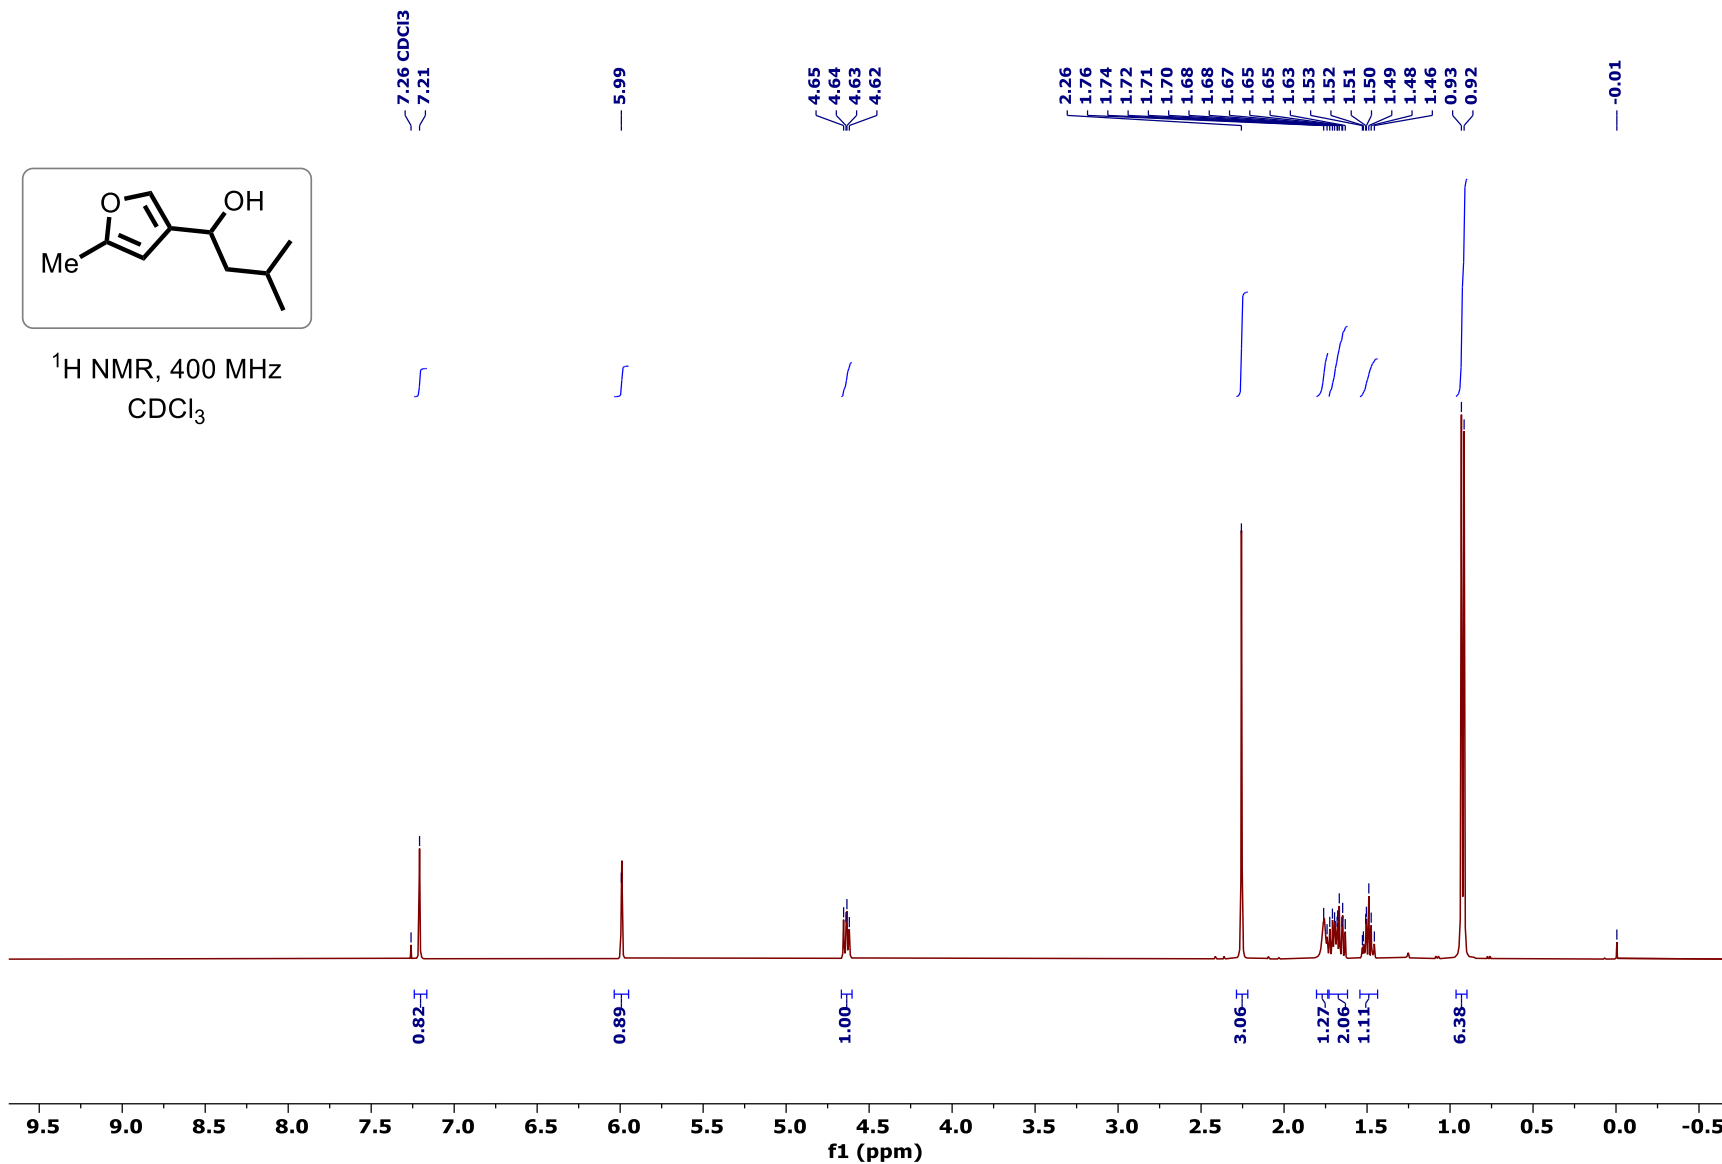

$^{13}\text{C}$  NMR spectrum of 3-methyl-1-(5-methylfuran-3-yl)butan-1-ol (16):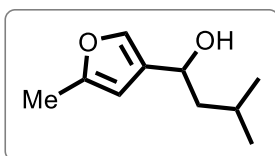 $^{13}\text{C}\{^1\text{H}\}$  NMR, 101 MHz  
 $\text{CDCl}_3$ 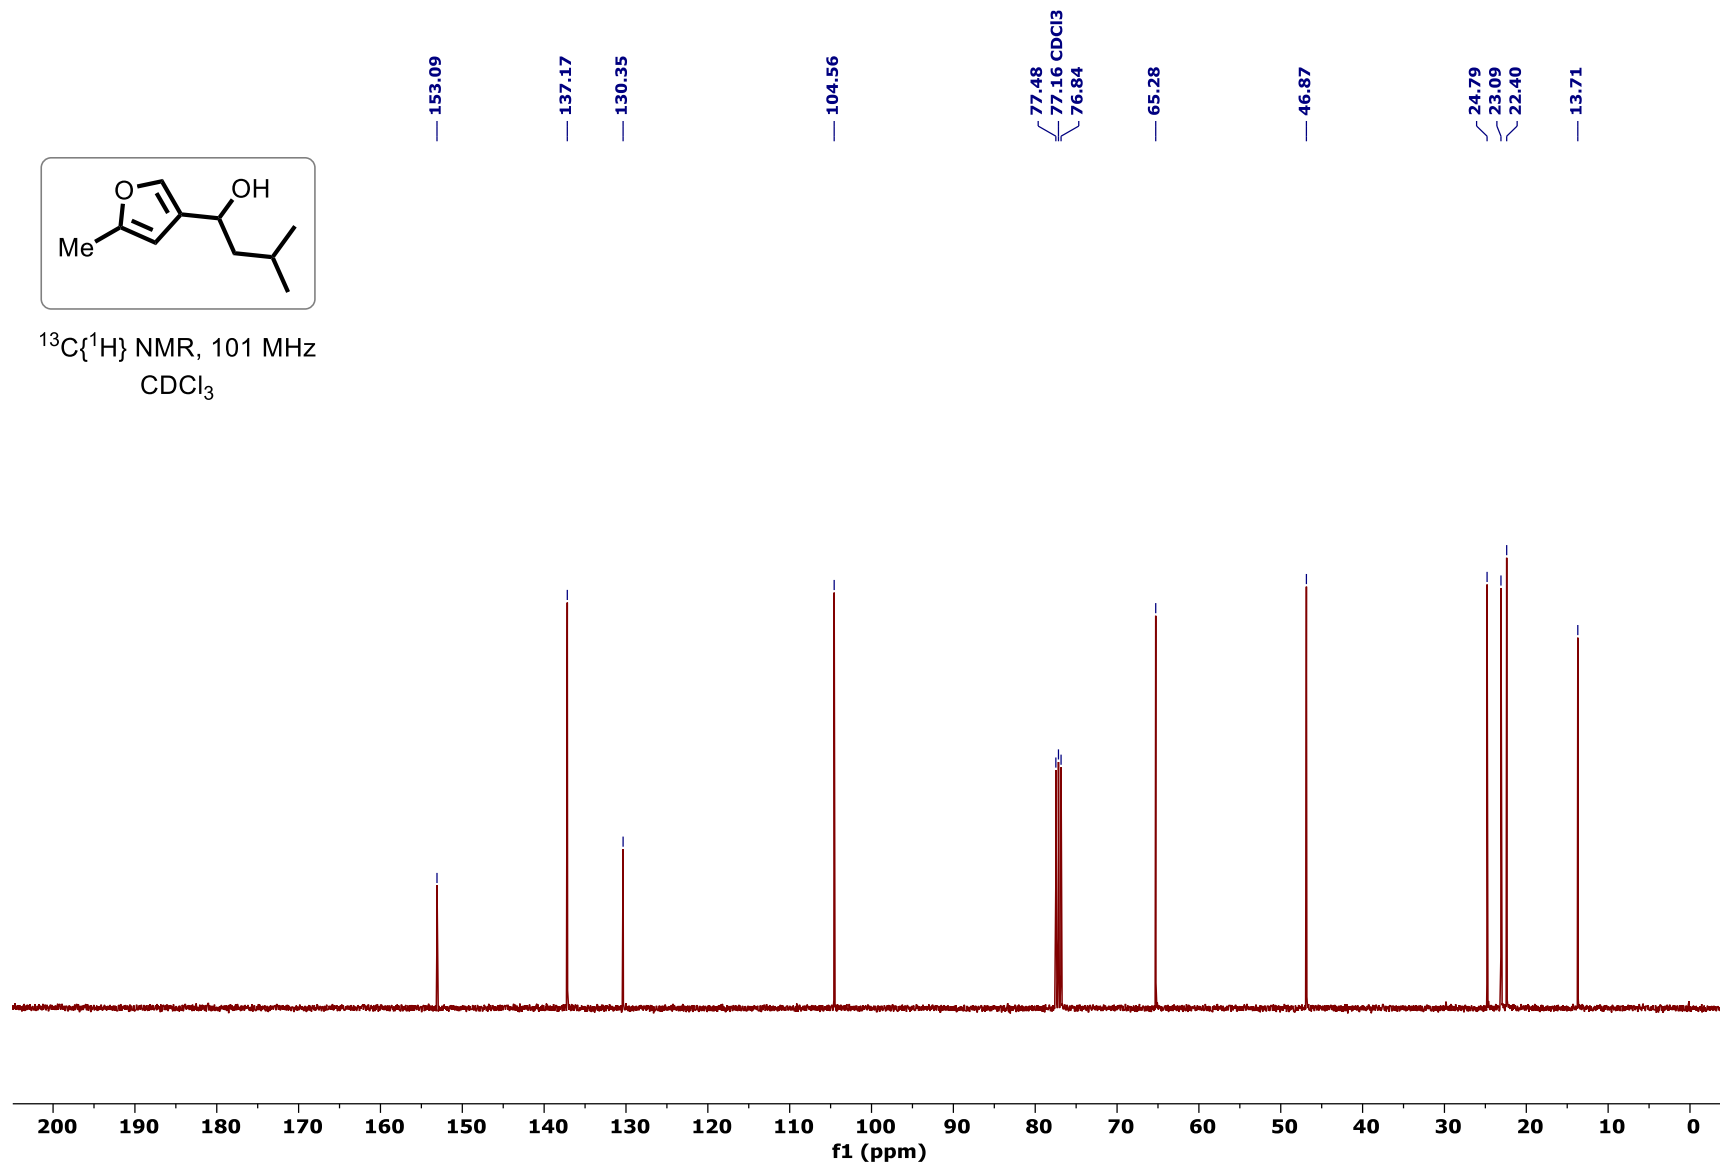

**<sup>1</sup>H NMR spectrum of rabdoketone A (2):**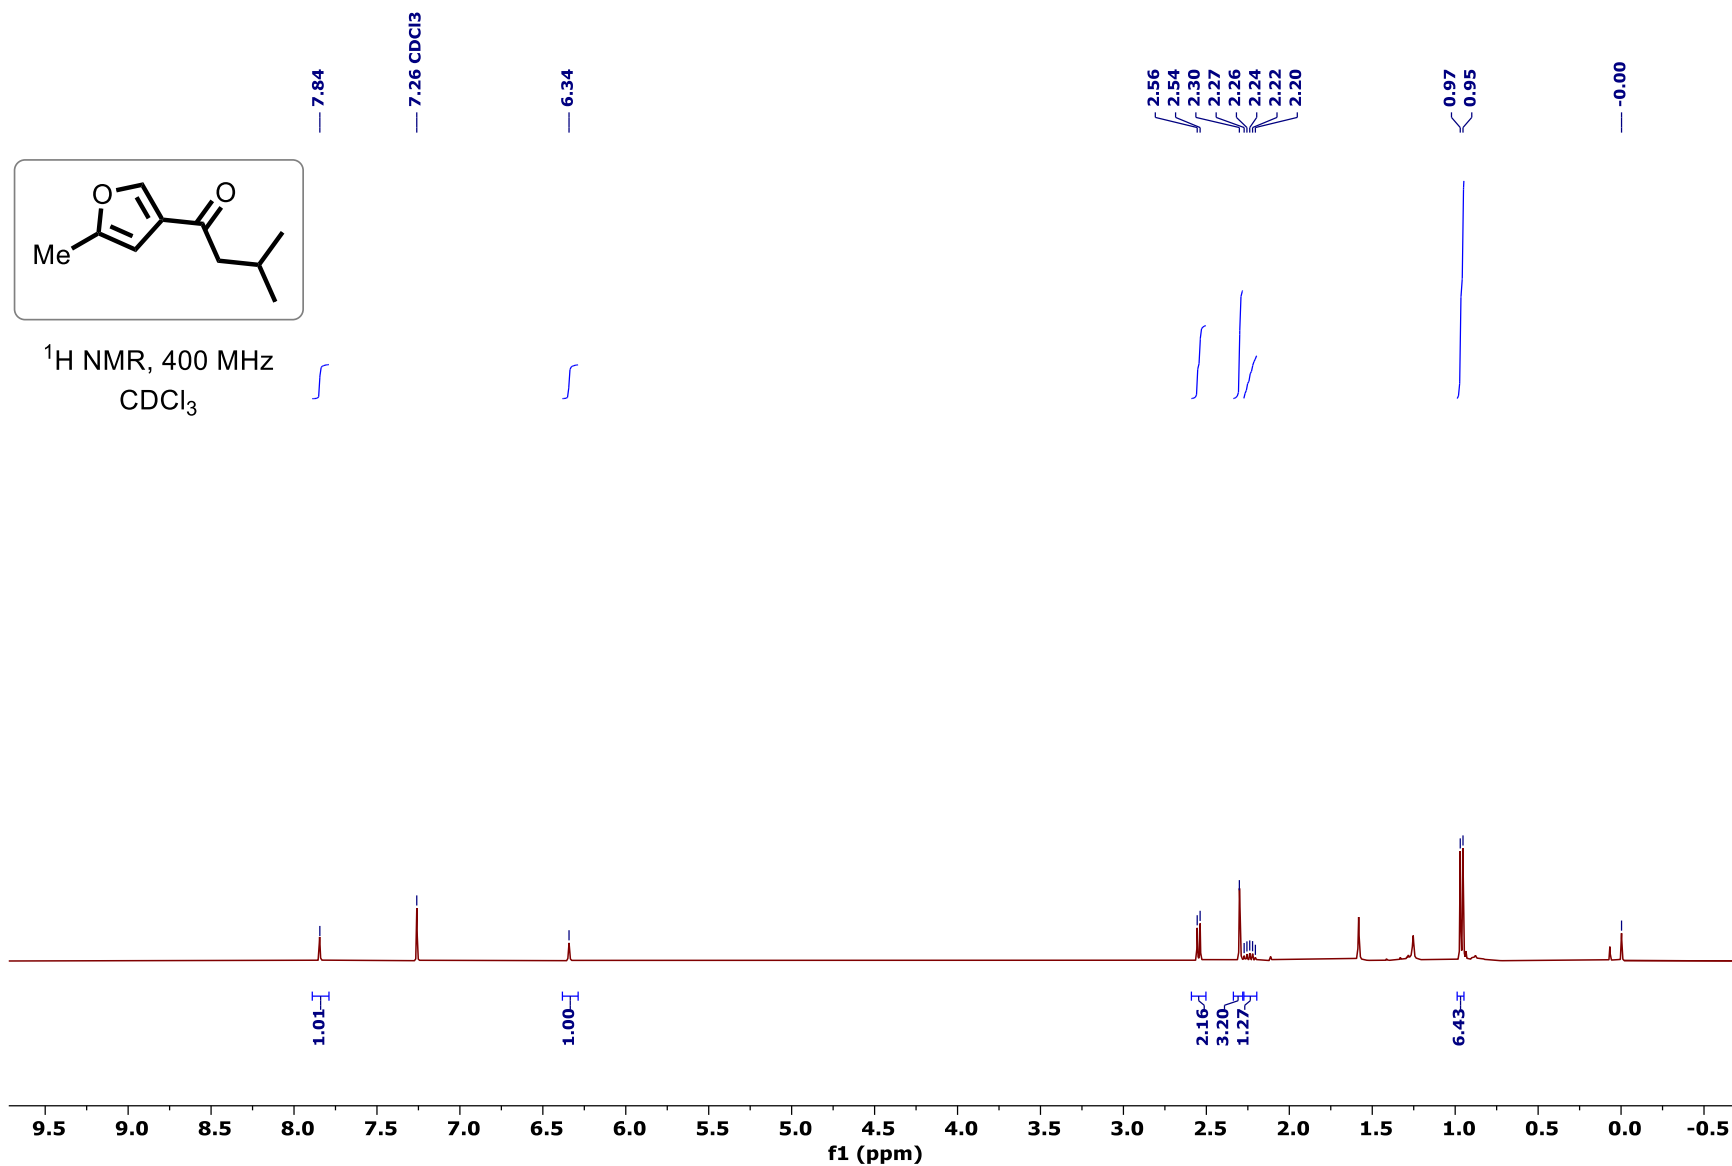

$^{13}\text{C}$  NMR spectrum of rabdoketone A (2):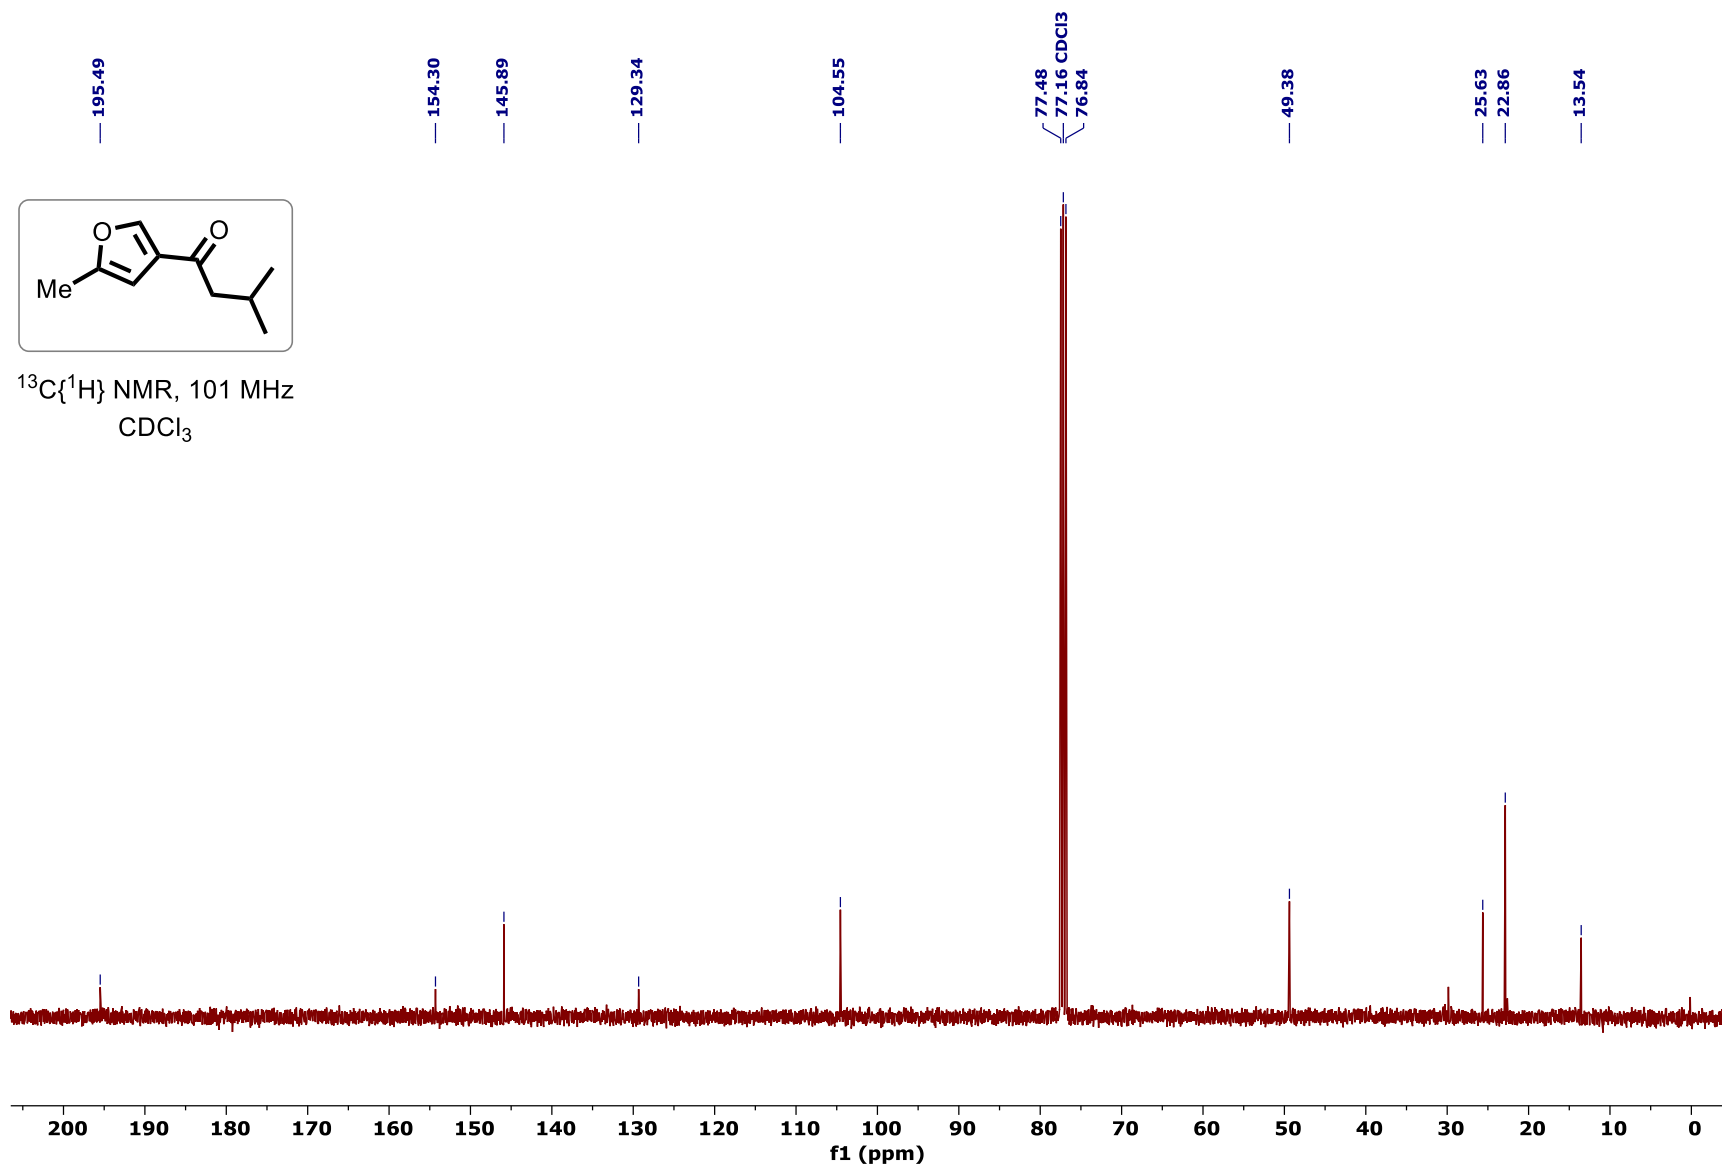

**<sup>1</sup>H NMR spectrum of 3-methyl-1-(5-methylfuran-3-yl)but-2-en-1-ol (18):**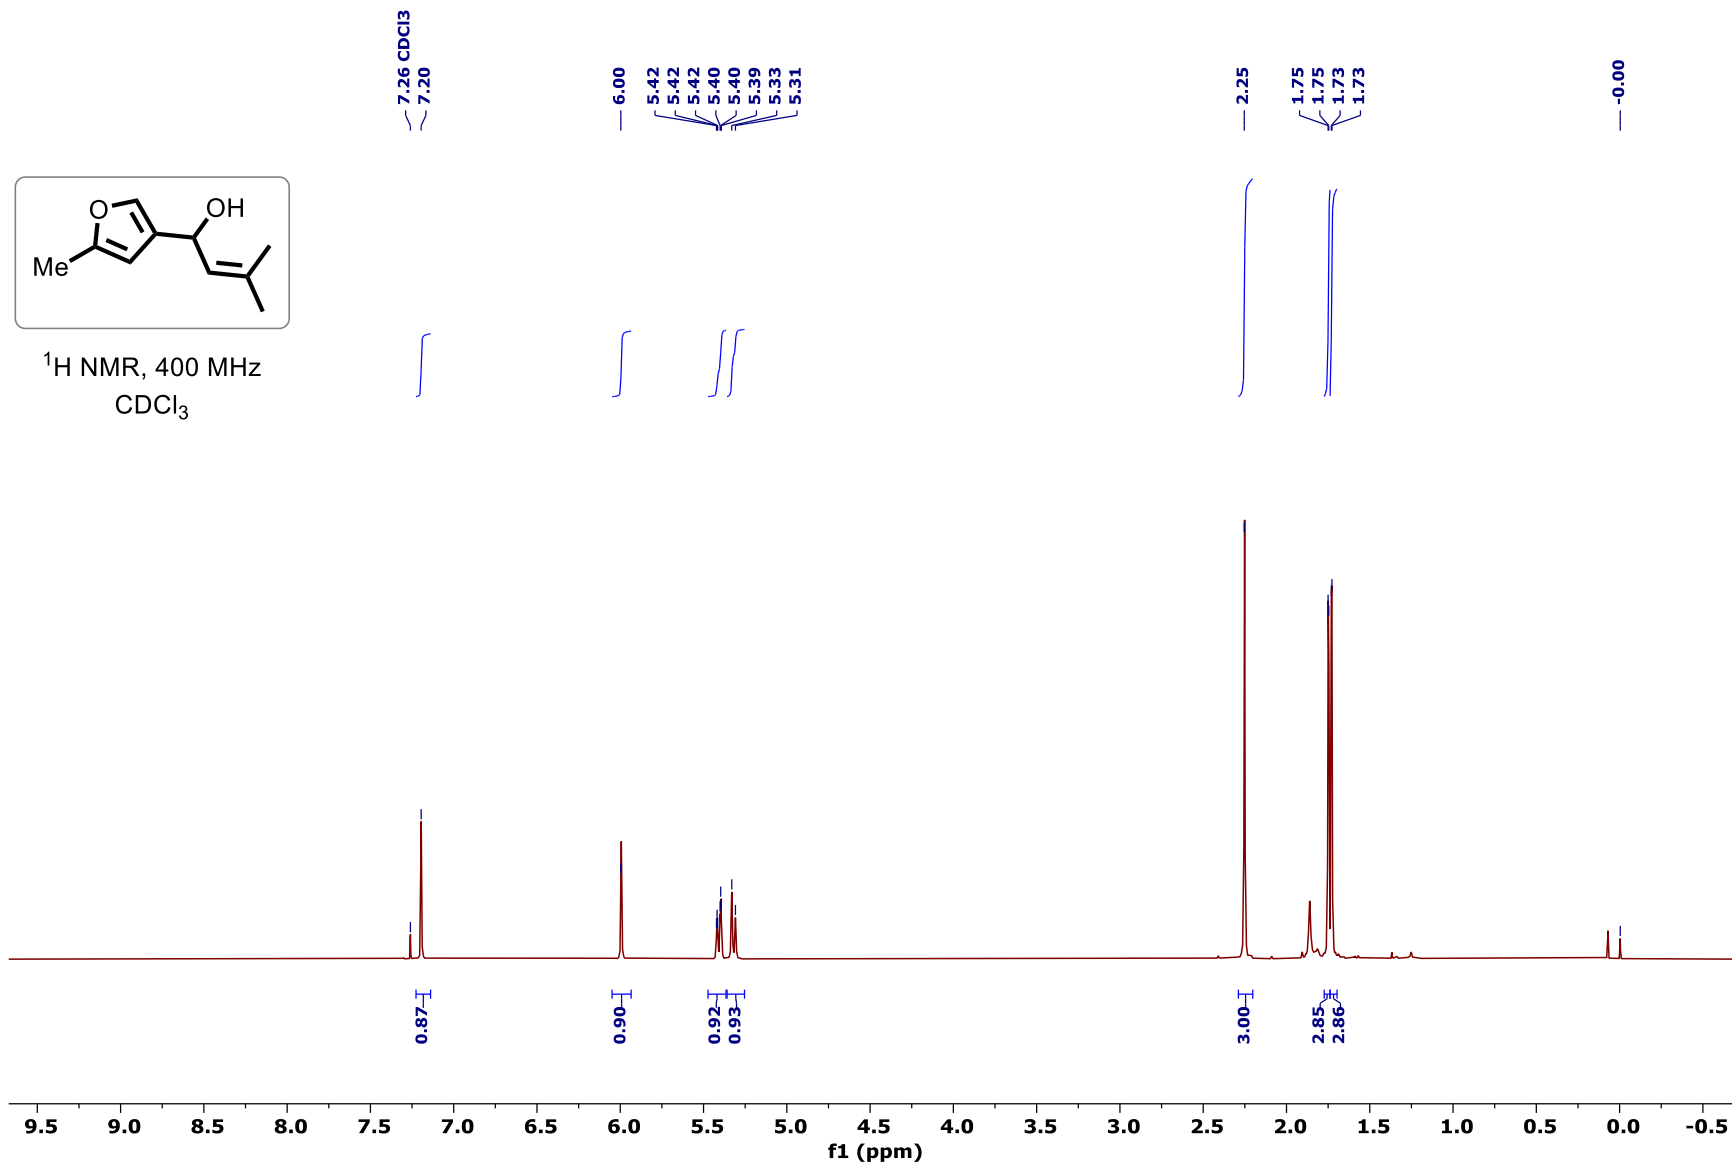

**$^{13}\text{C}$  NMR spectrum of 3-methyl-1-(5-methylfuran-3-yl)but-2-en-1-ol (18):**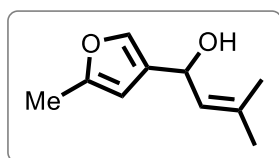

$^{13}\text{C}\{^1\text{H}\}$  NMR, 101 MHz  
 $\text{CDCl}_3$

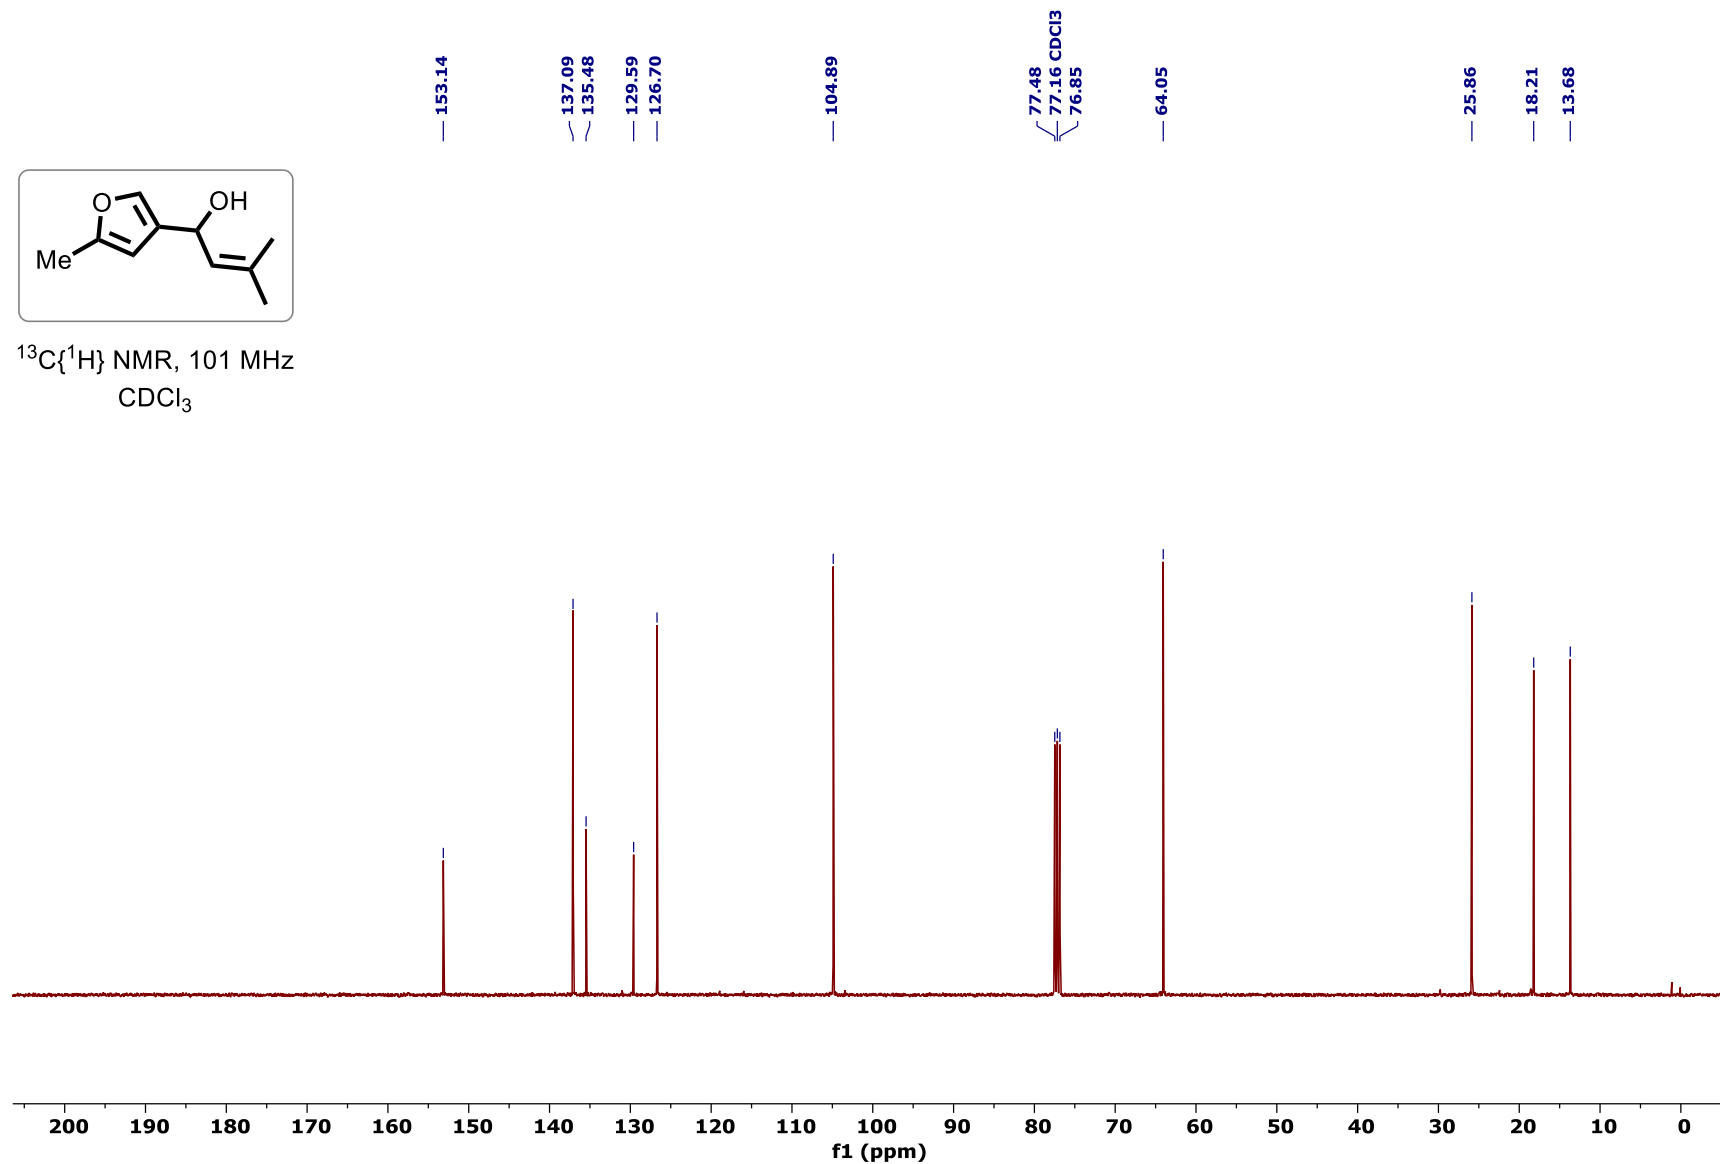

**<sup>1</sup>H NMR spectrum of rabdoketone B (3):**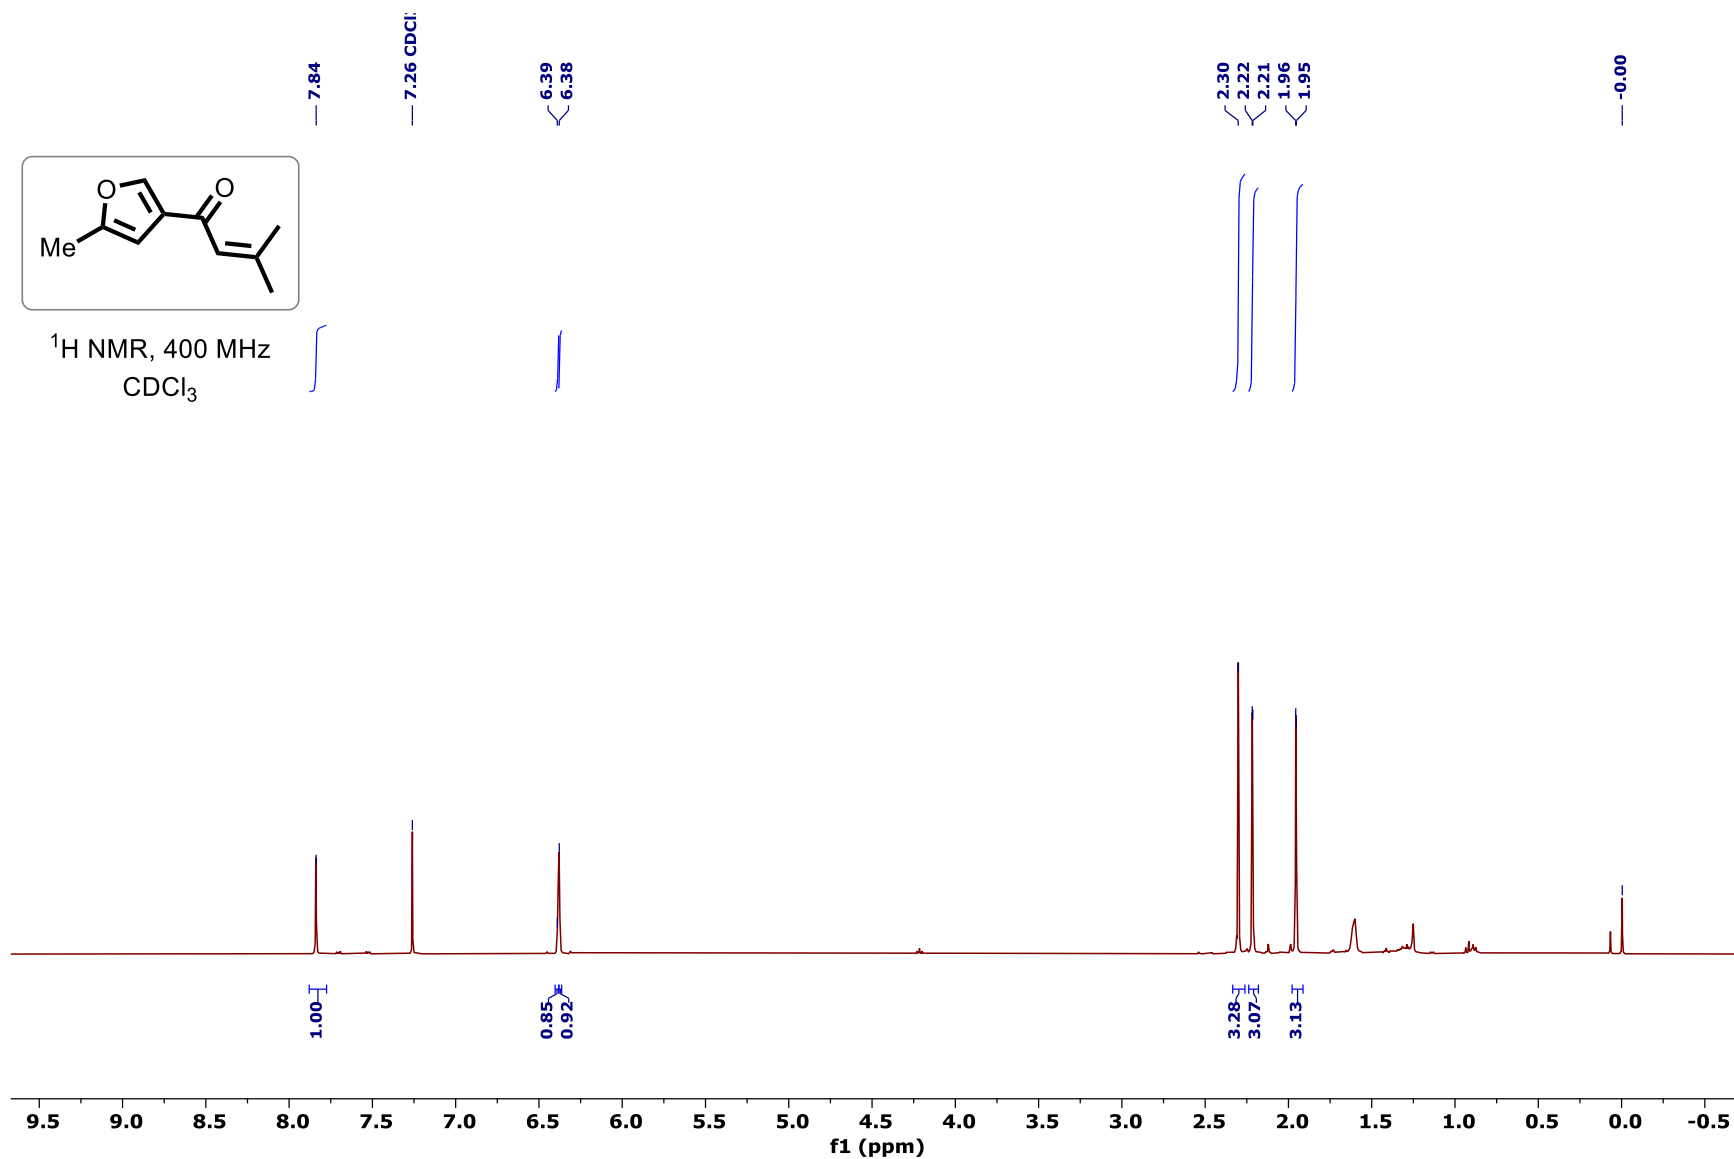



$^{13}\text{C}$  NMR spectrum of rabdoketone B (3):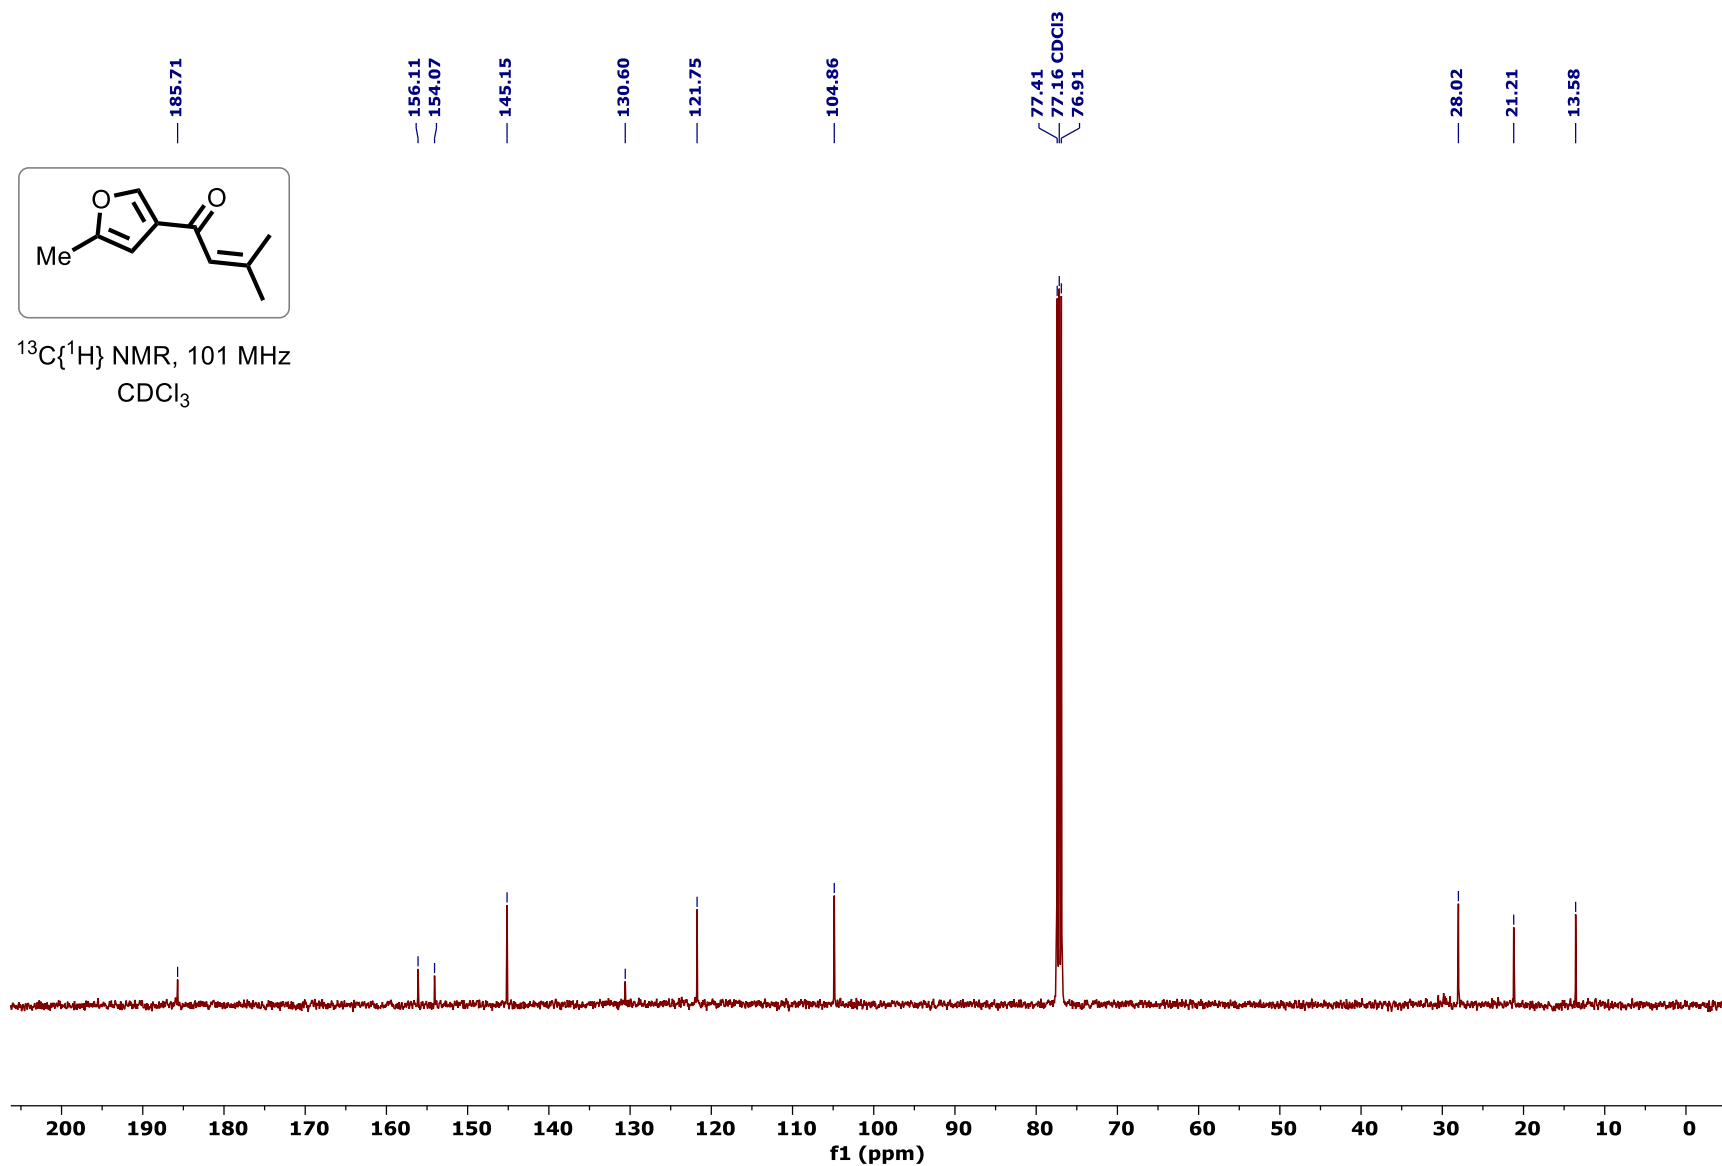

**$^1\text{H}$  NMR spectrum of 1-(3-hydroxyoxetan-3-yl)nonan-2-one (21):**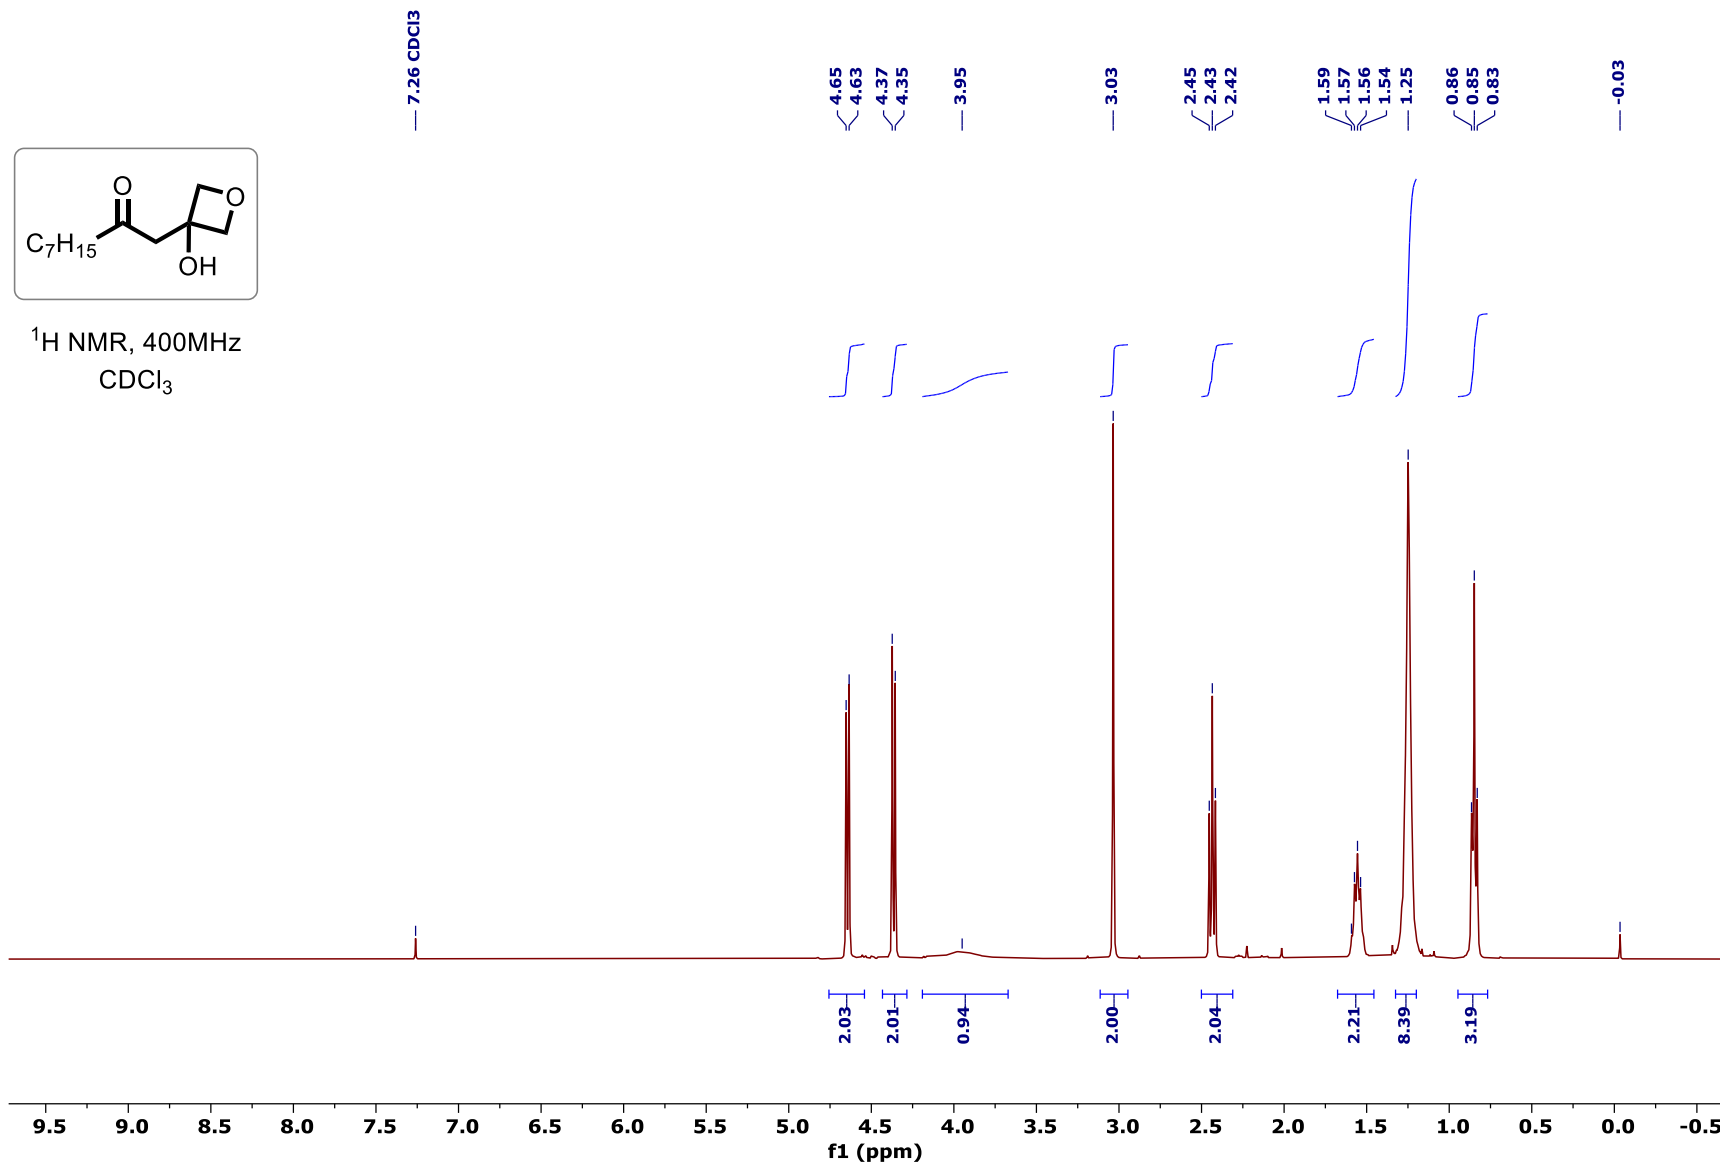

**$^{13}\text{C}$  NMR spectrum of 1-(3-hydroxyoxetan-3-yl)nonan-2-one (21):**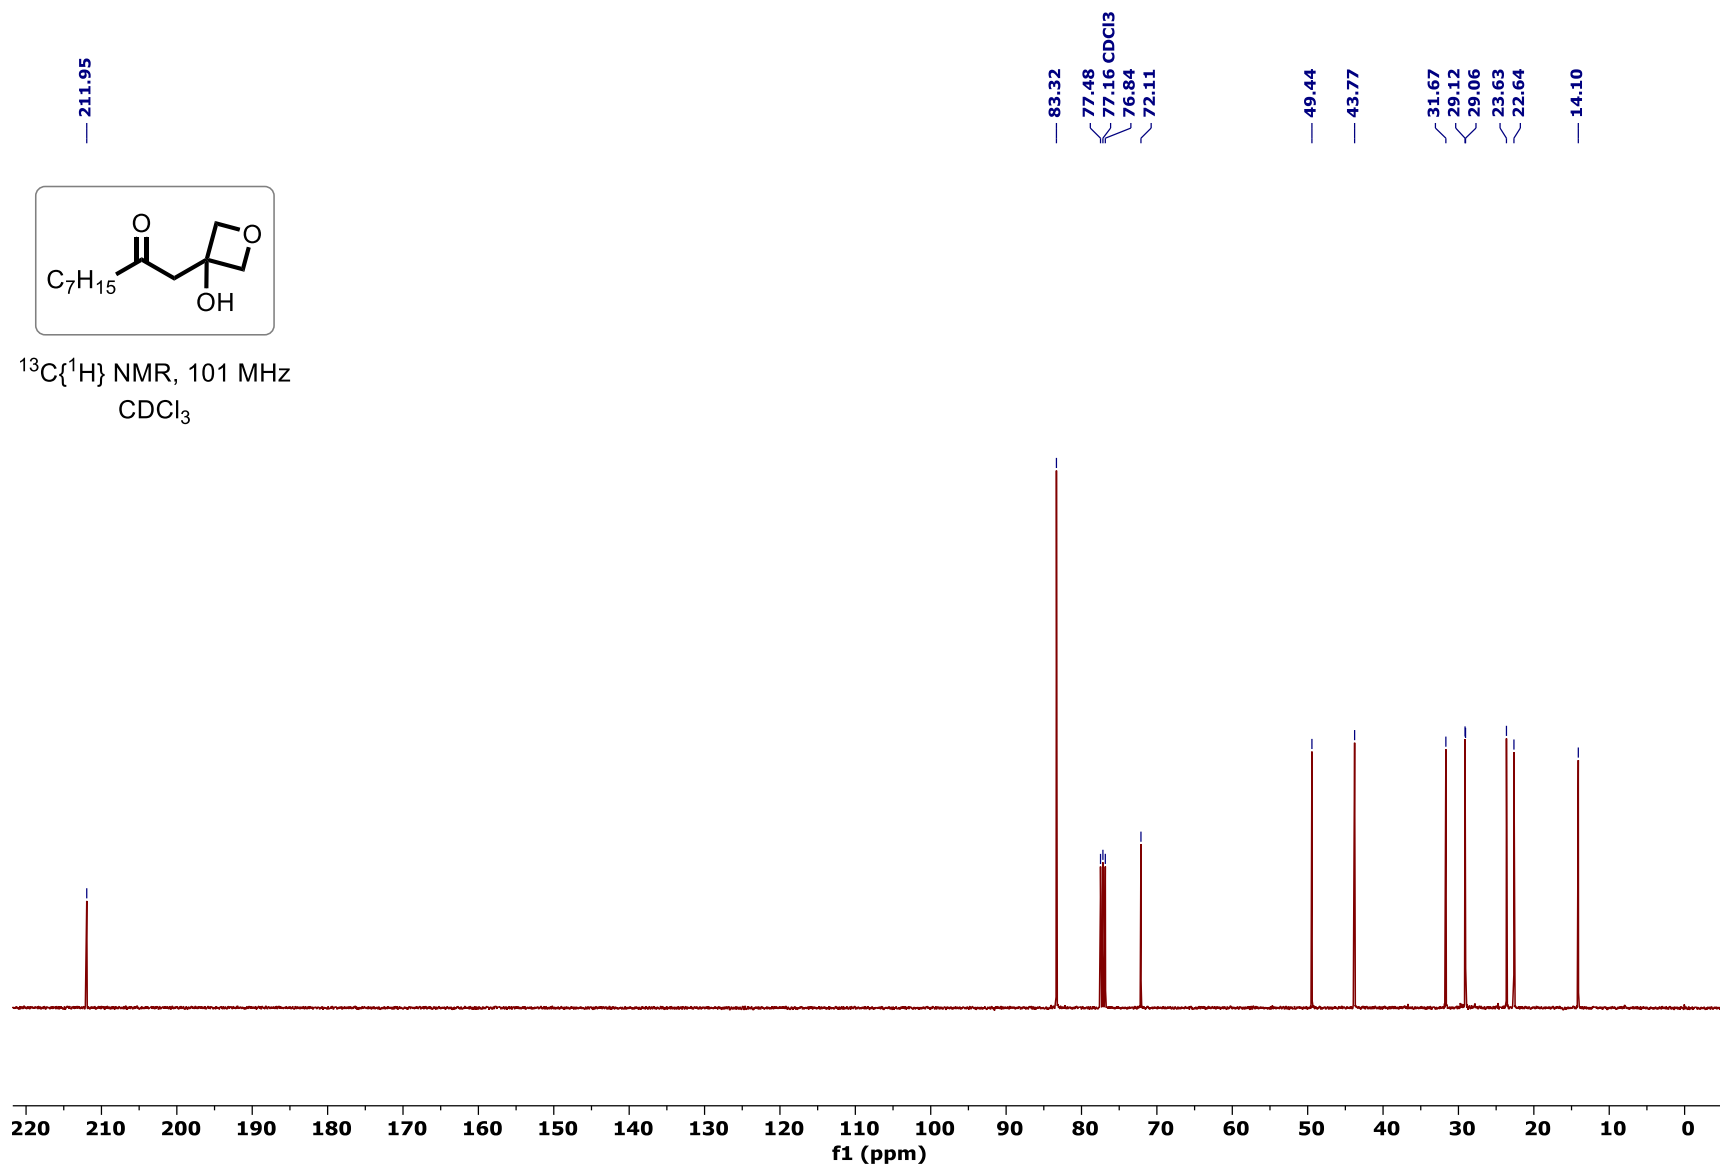

**$^1\text{H}$  NMR spectrum of (5-heptylfuran-3-yl)methanol (23):**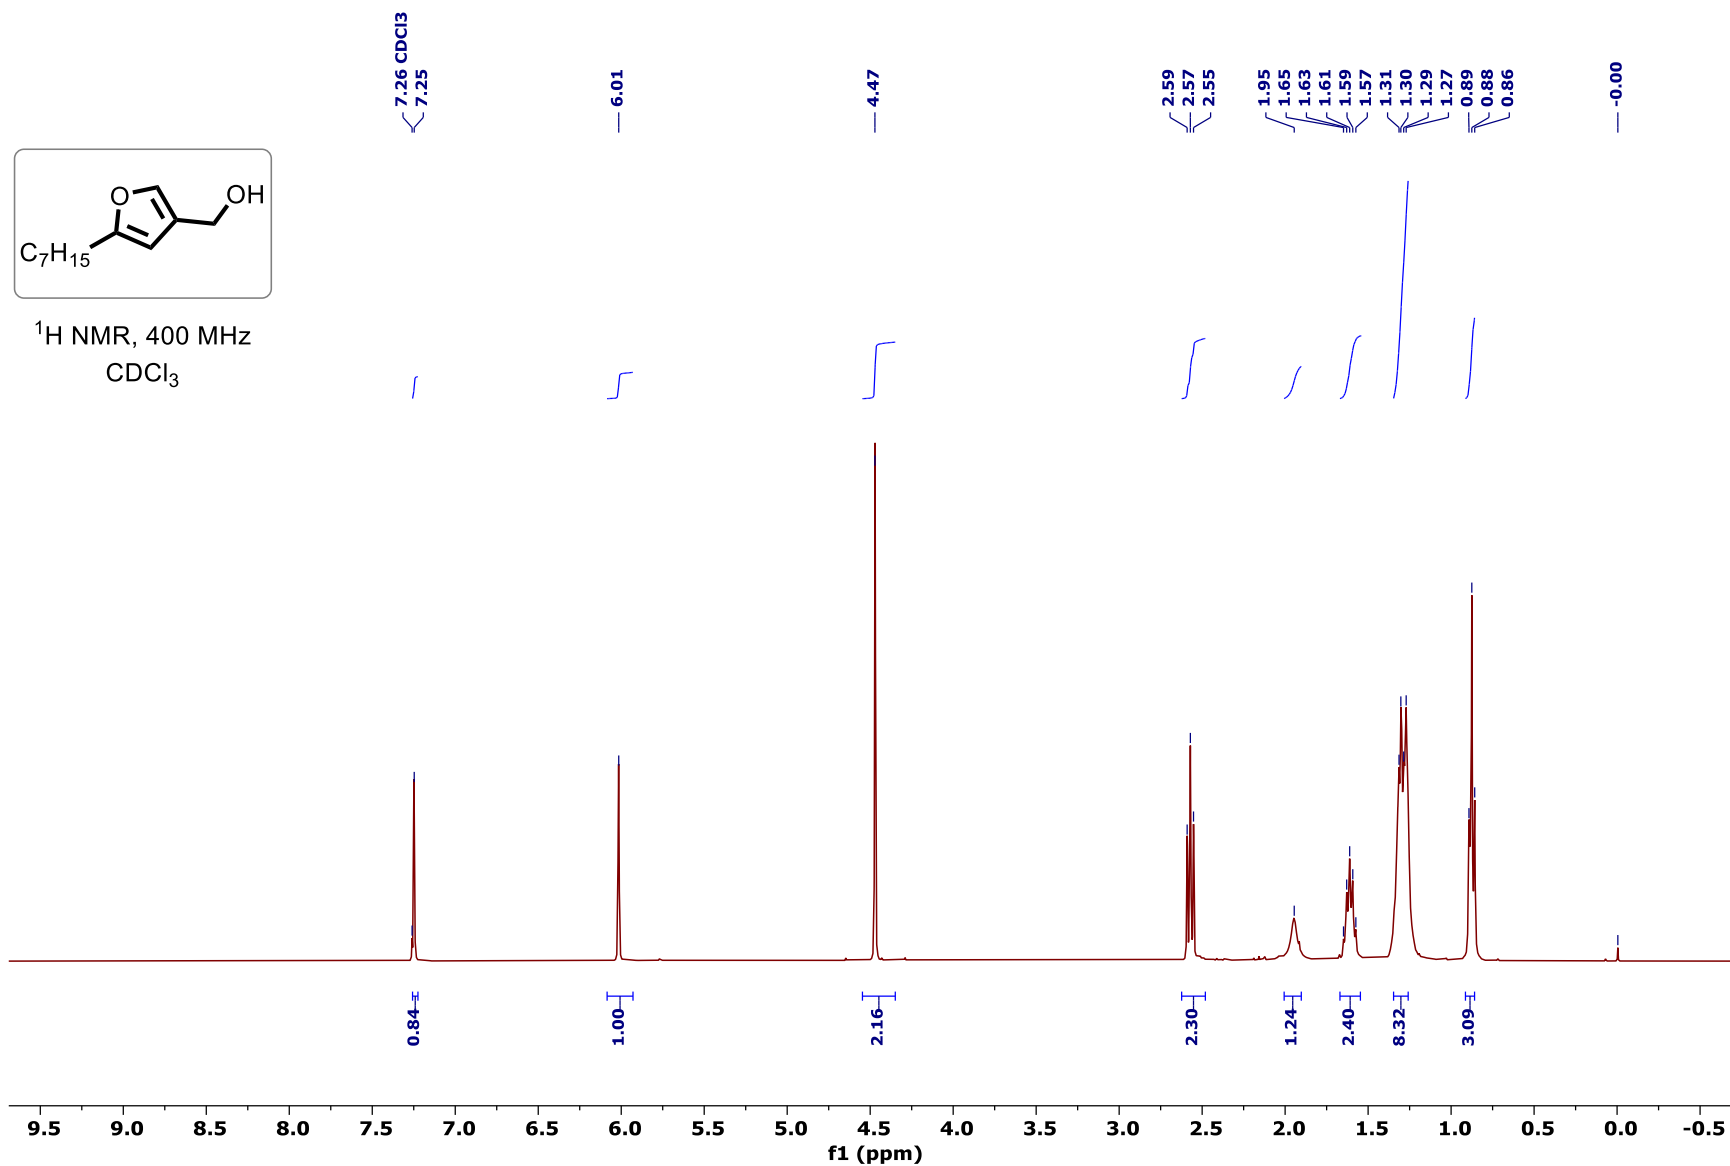

**$^{13}\text{C}$  NMR spectrum of (5-heptylfuran-3-yl)methanol (23):**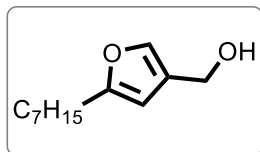

$^{13}\text{C}\{^1\text{H}\}$  NMR, 101 MHz  
 $\text{CDCl}_3$

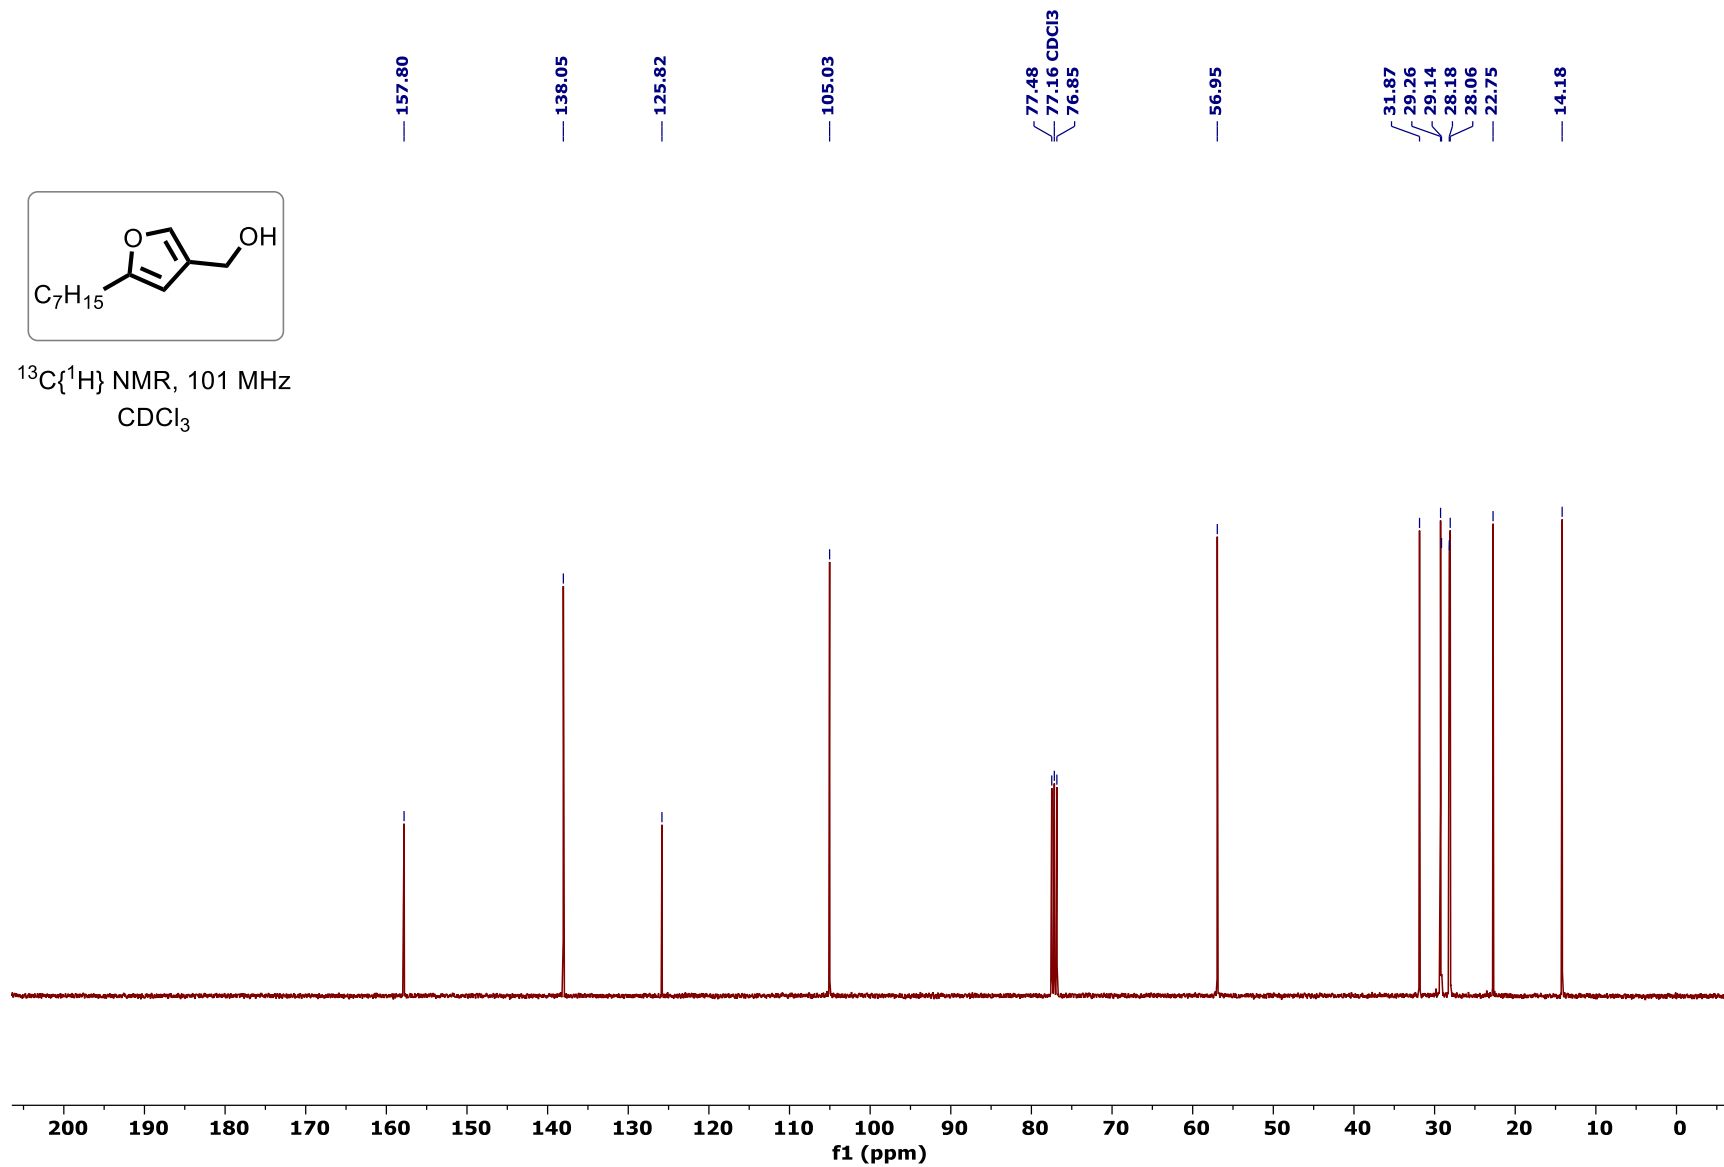

**<sup>1</sup>H NMR spectrum of paleofuran A (4):**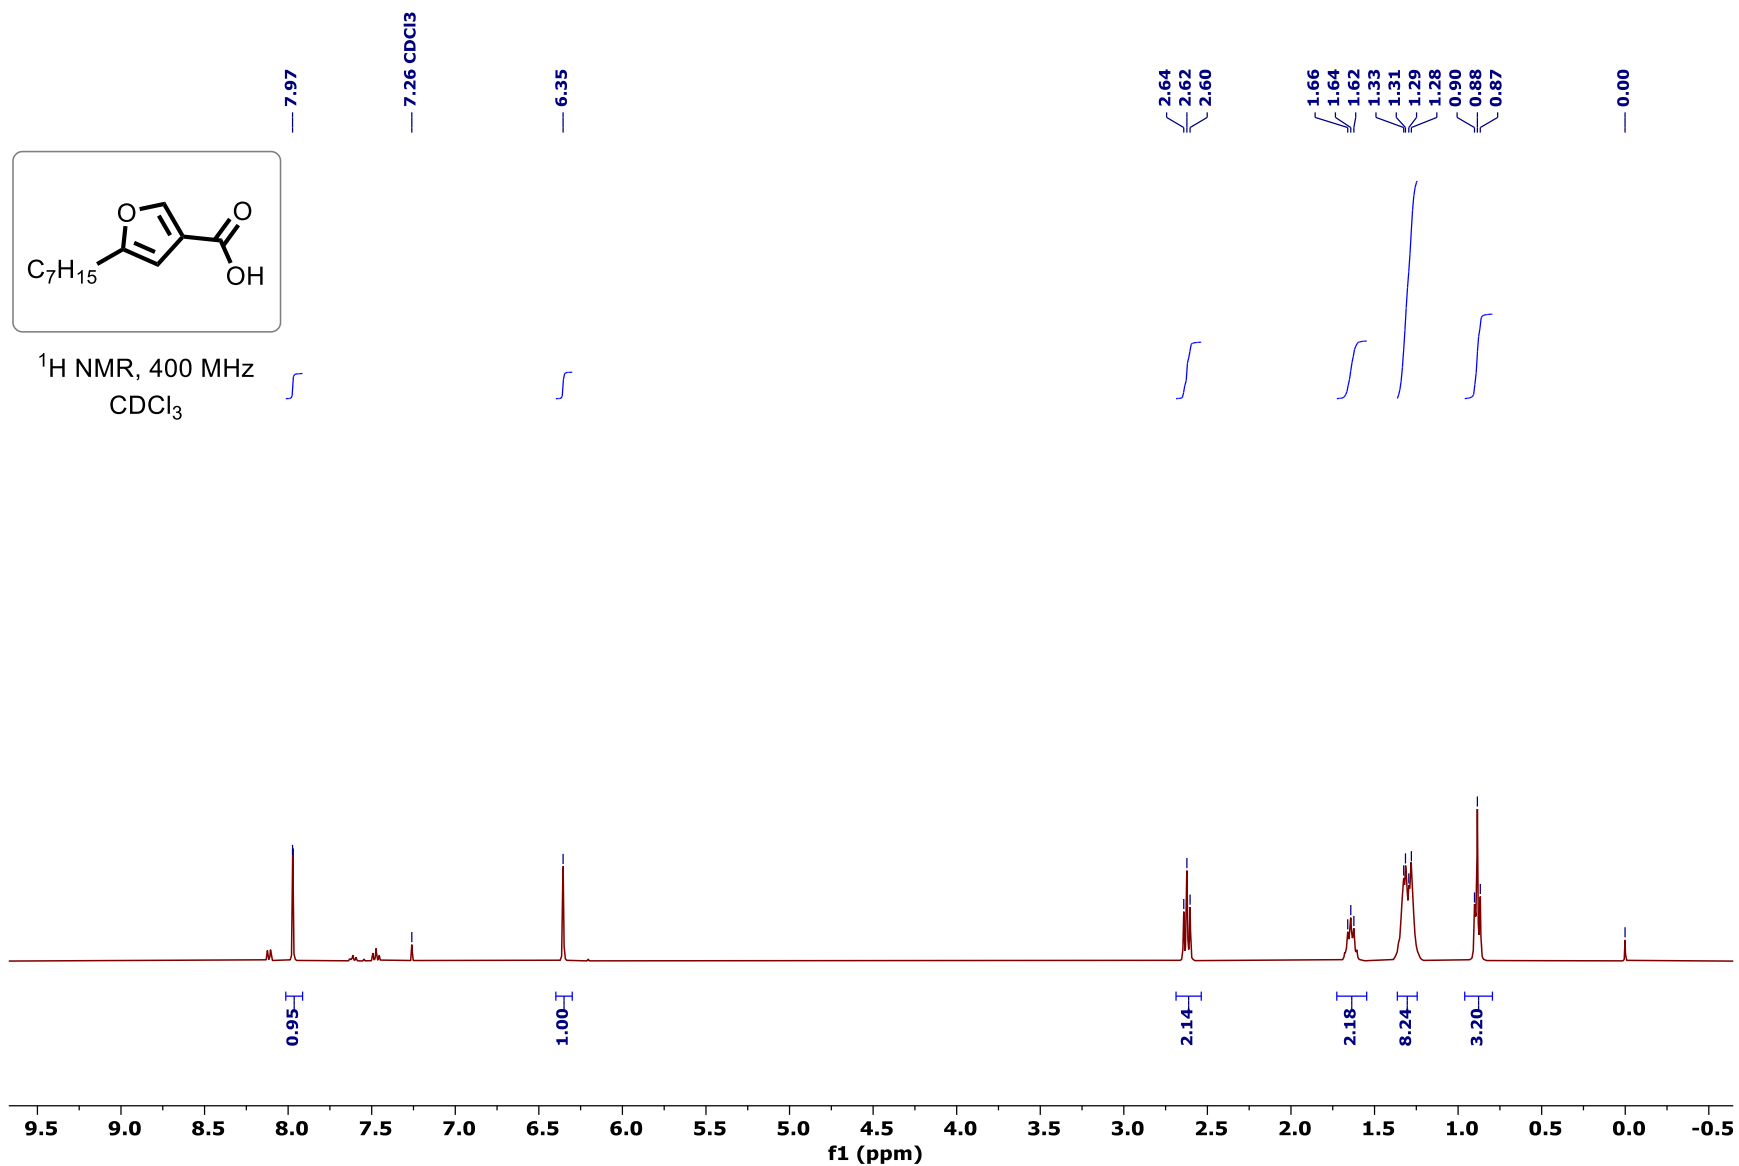

$^{13}\text{C}$  NMR spectrum of paleofuran A (4):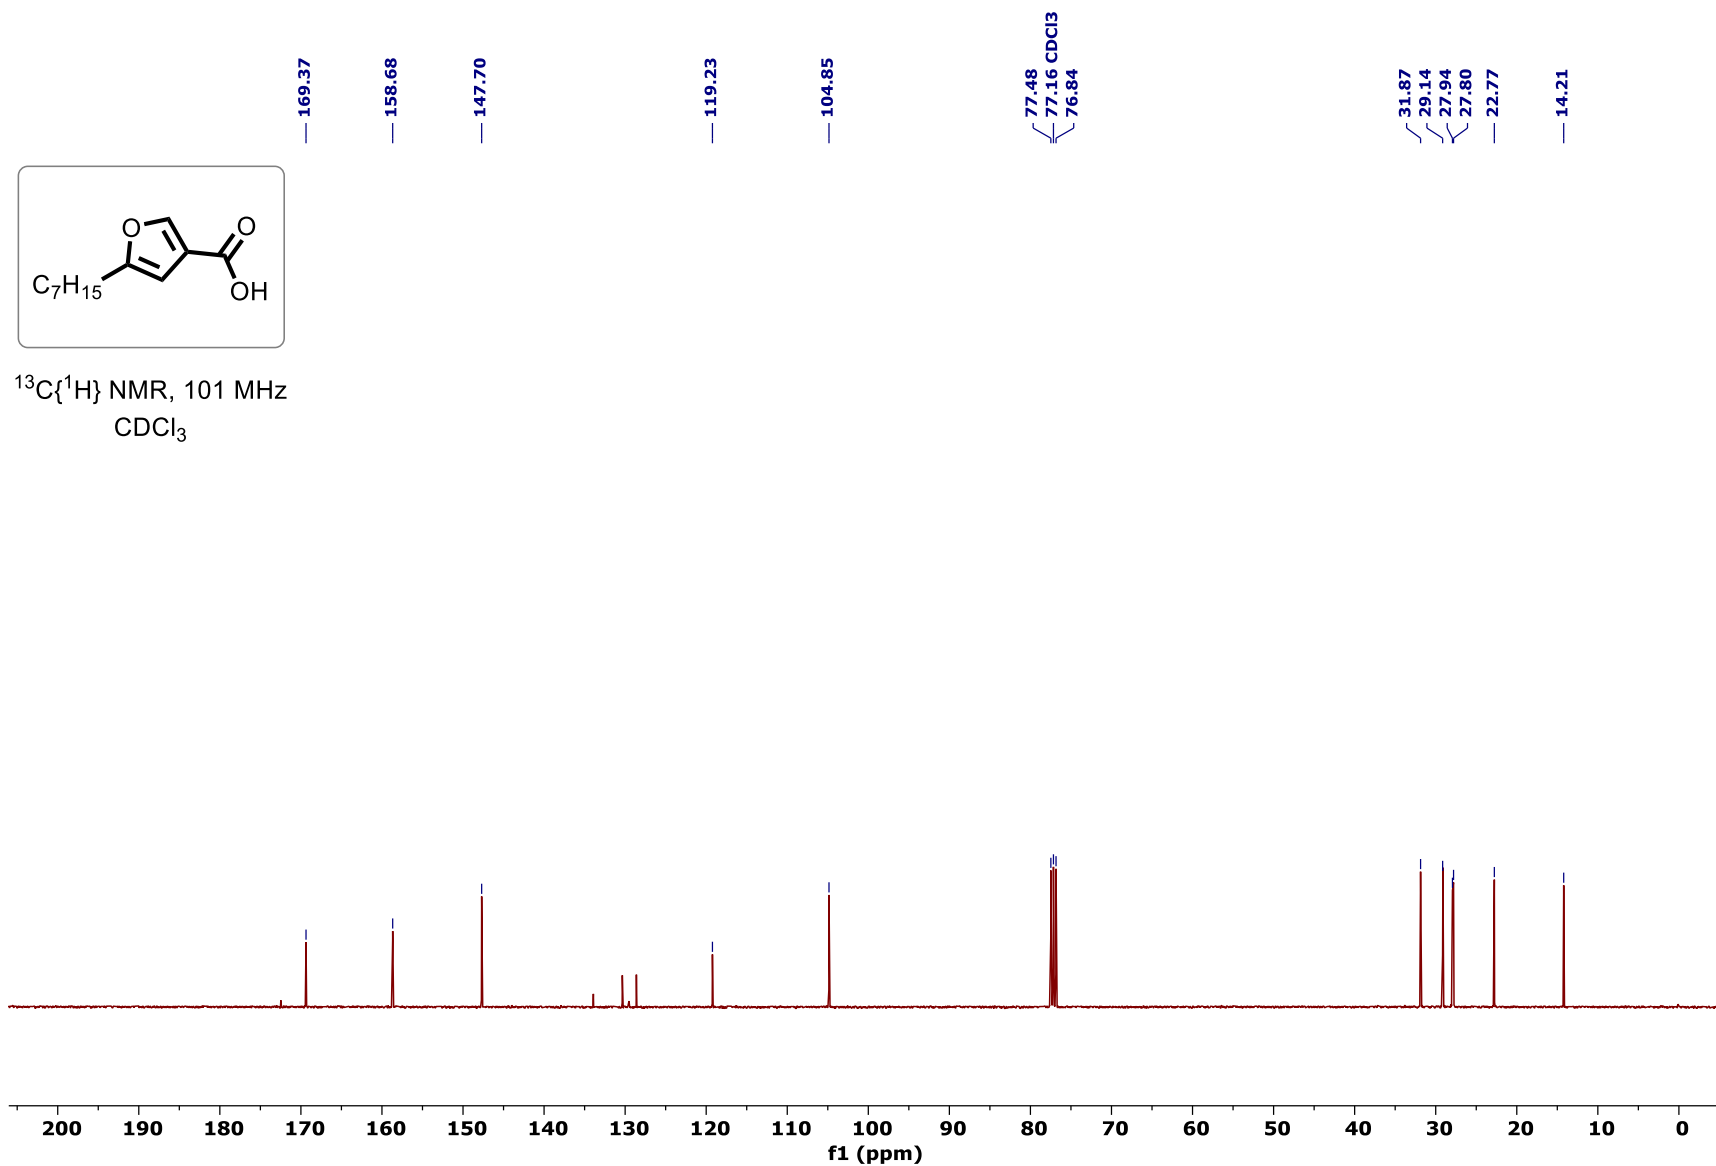

**$^1\text{H}$  NMR spectrum of 1-(3-hydroxyoxetan-3-yl)undecan-2-one (22):**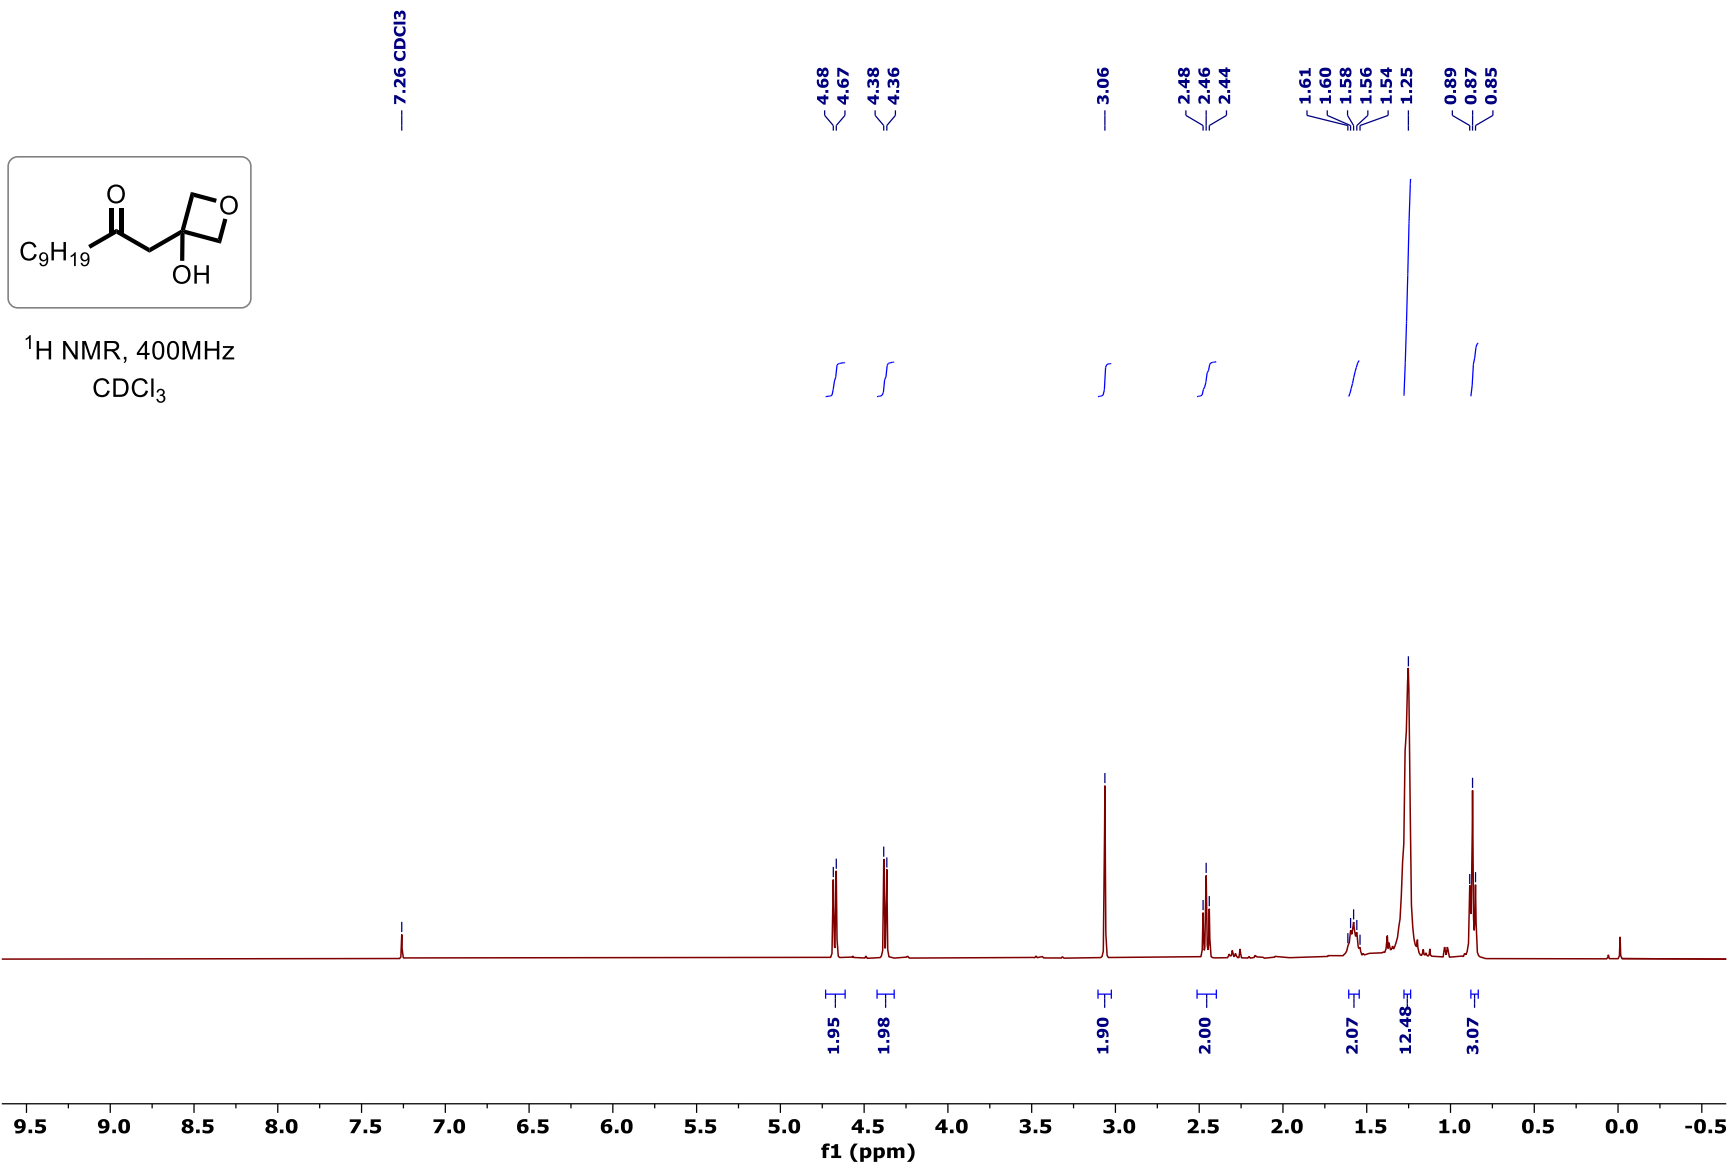



$^{13}\text{C}$  NMR spectrum of 1-(3-hydroxyoxetan-3-yl)undecan-2-one (22):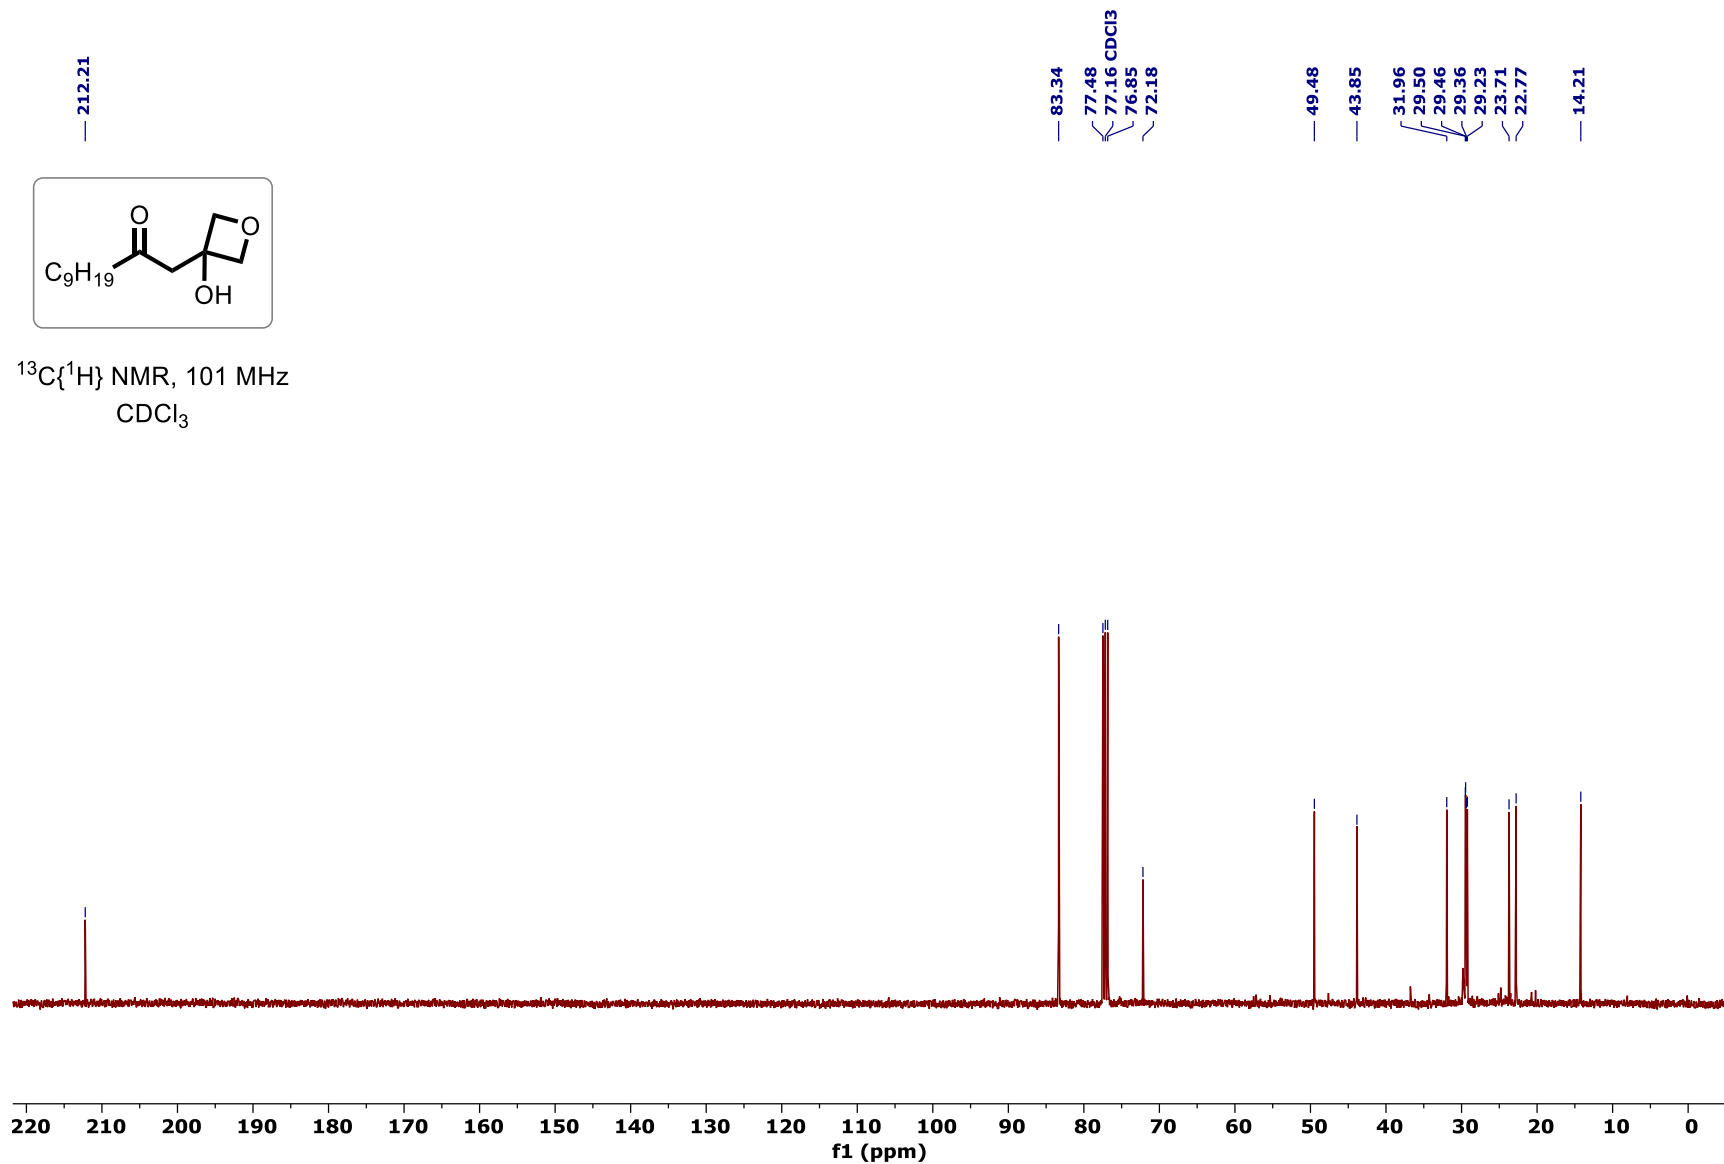

**$^1\text{H}$  NMR spectrum of (5-nonylfuran-3-yl)methanol (24):**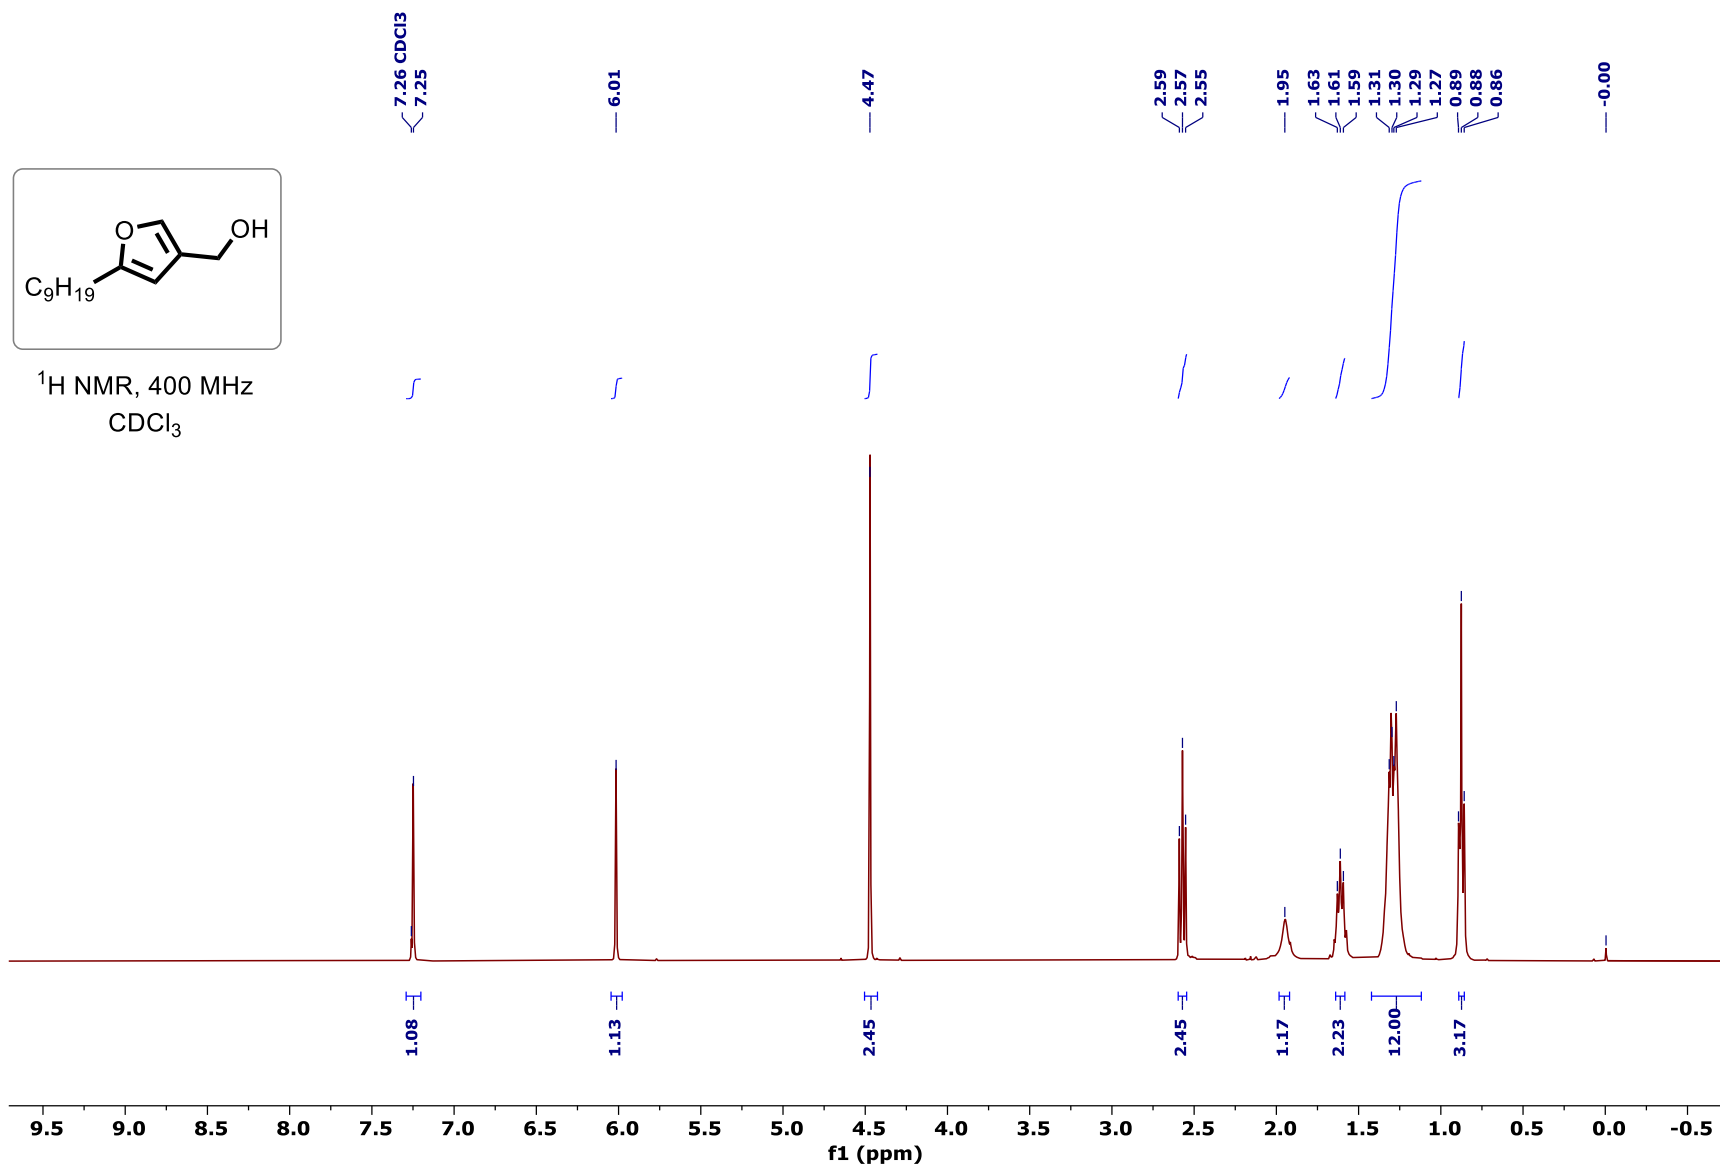

**$^{13}\text{C}$  NMR spectrum of (5-nonylfuran-3-yl)methanol (24):**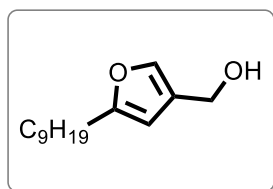

$^{13}\text{C}\{^1\text{H}\}$  NMR, 101 MHz  
 $\text{CDCl}_3$

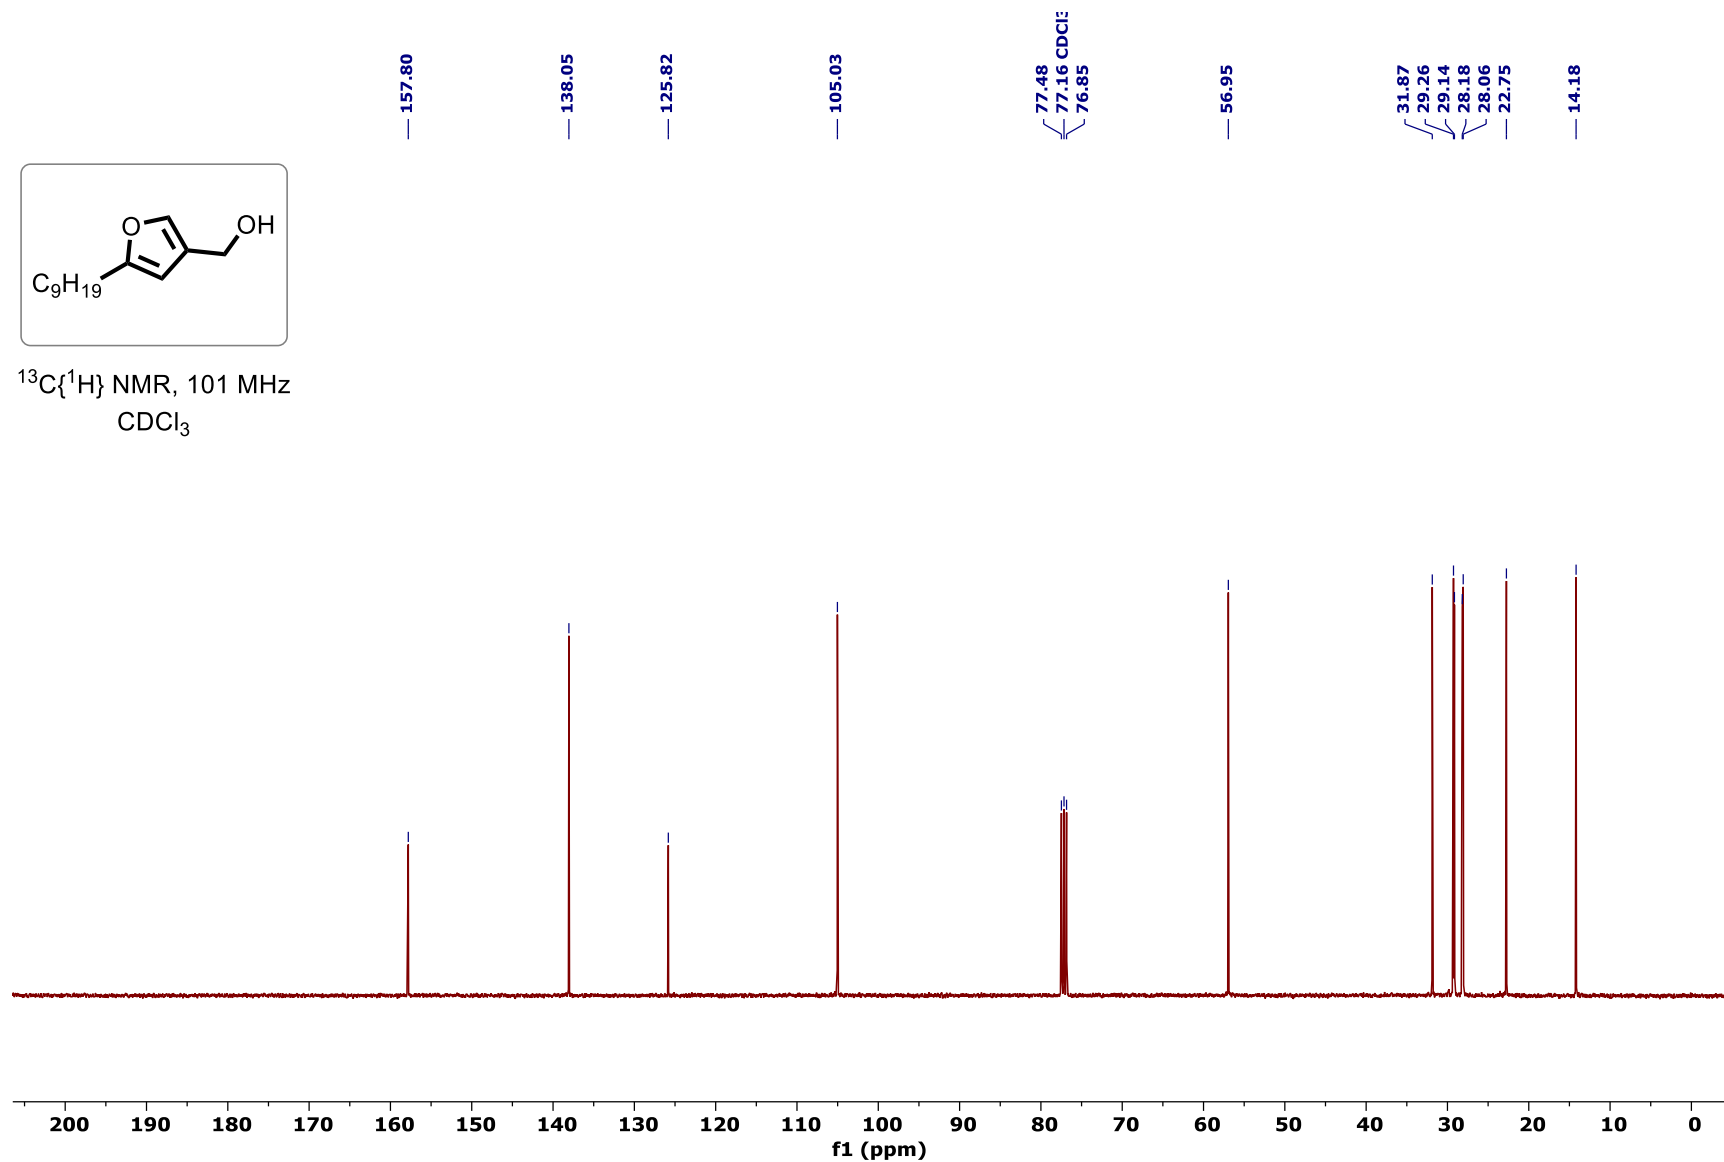

**$^1\text{H}$  NMR spectrum of paleofuran B (5):**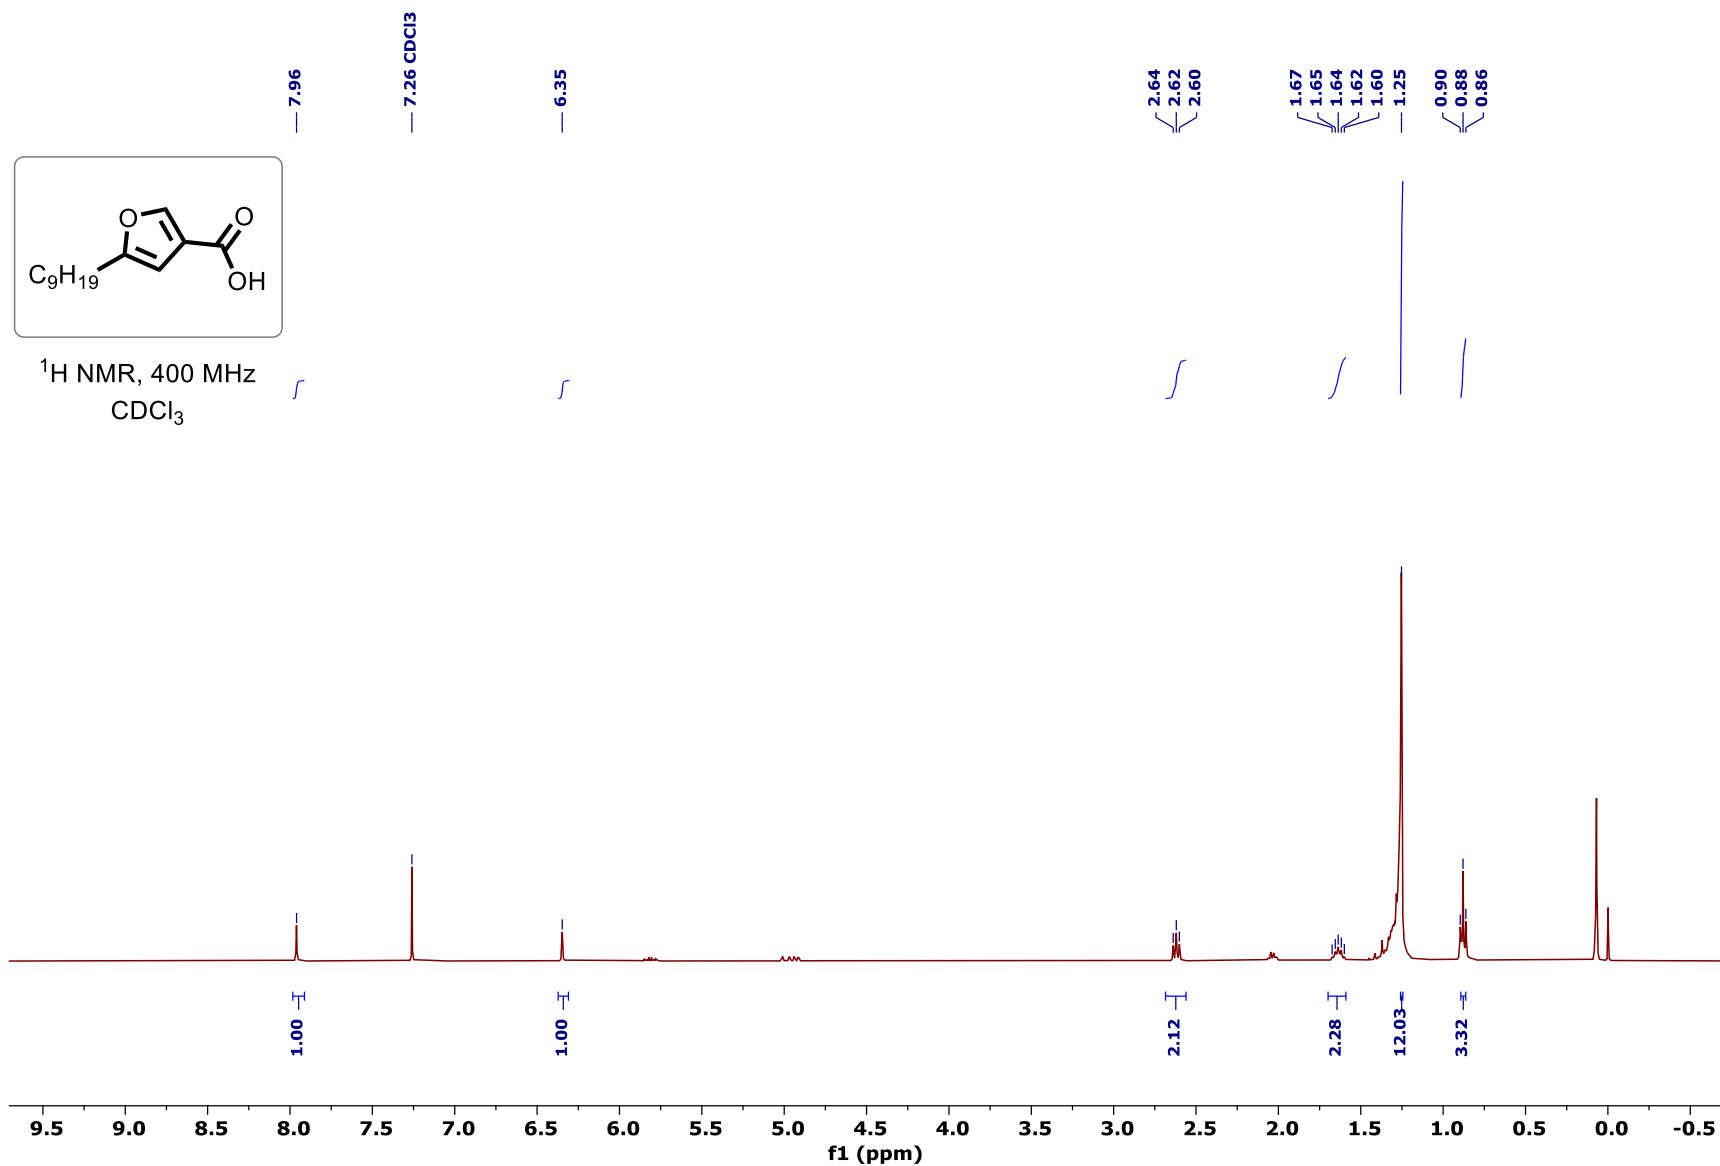

$^{13}\text{C}$  NMR spectrum of paleofuran B (5):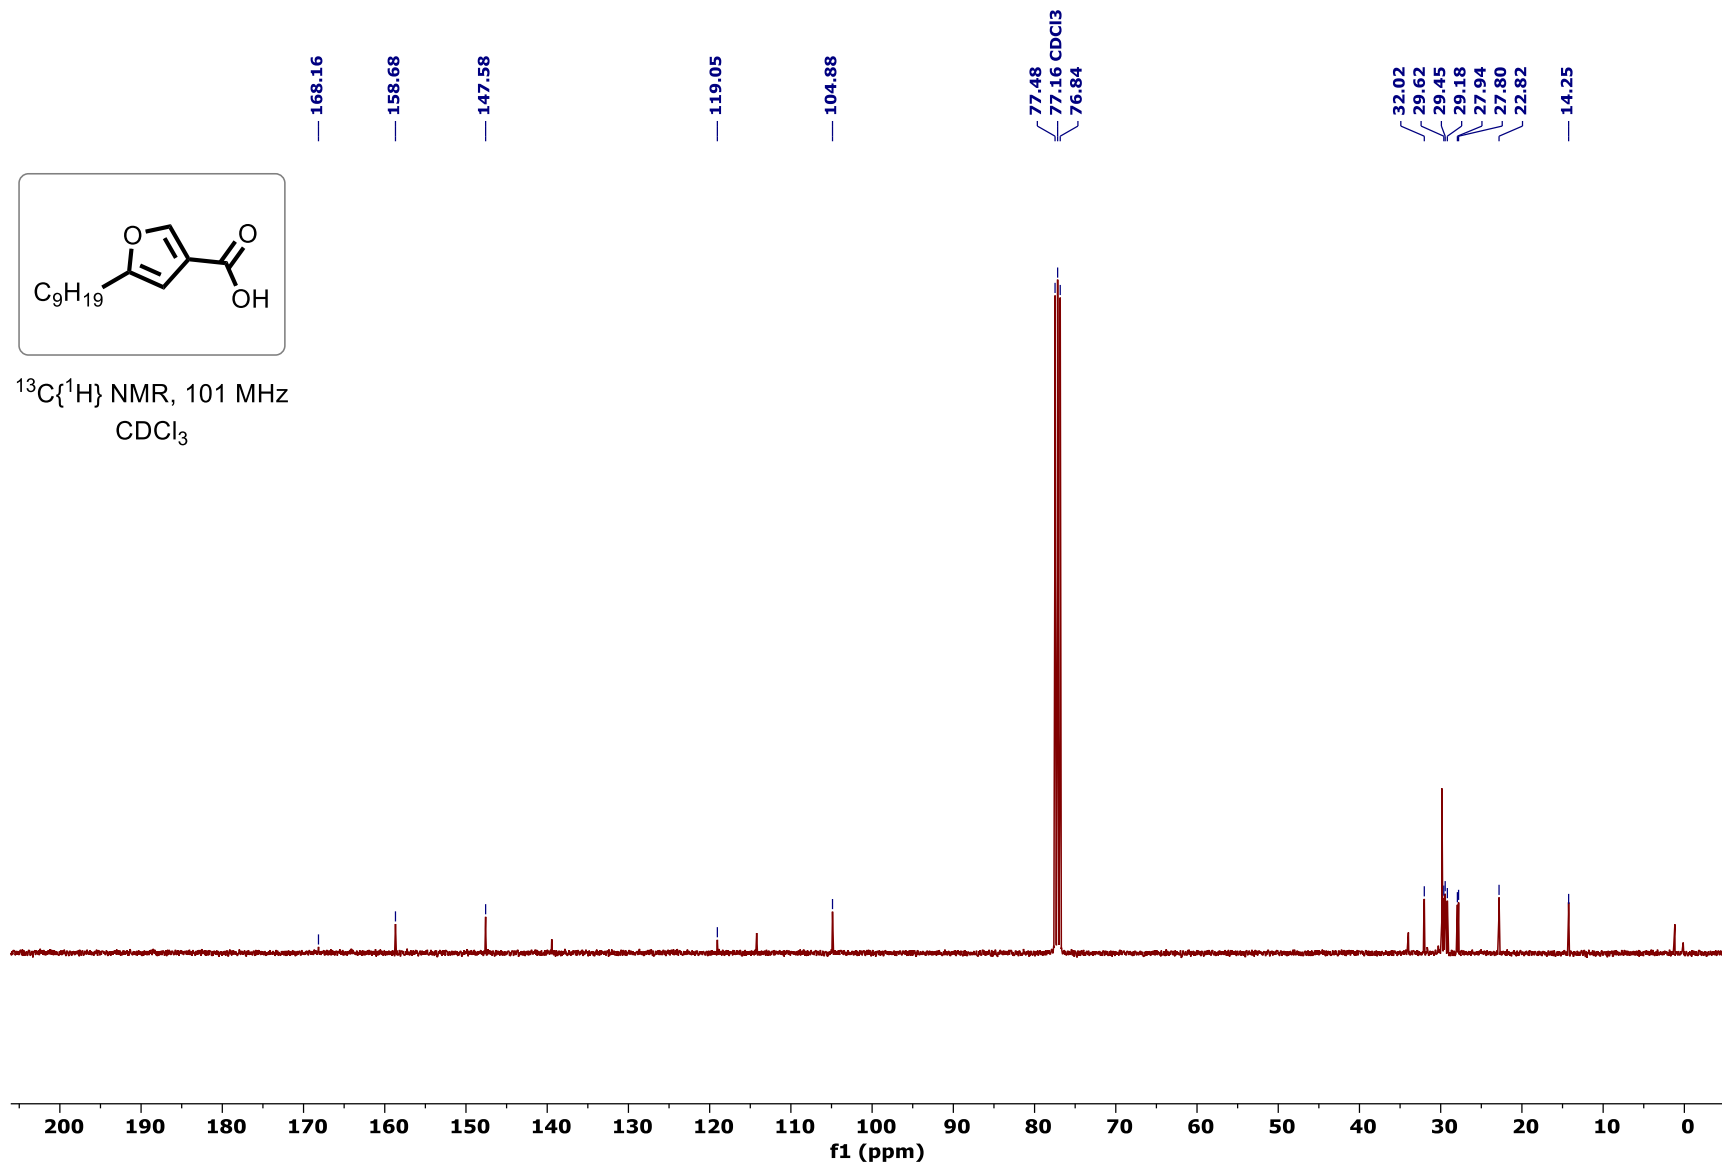

**$^1\text{H}$  NMR spectrum of 5-(2,5-bis(allyloxy)phenyl)furan-3-carboxylic acid (27):**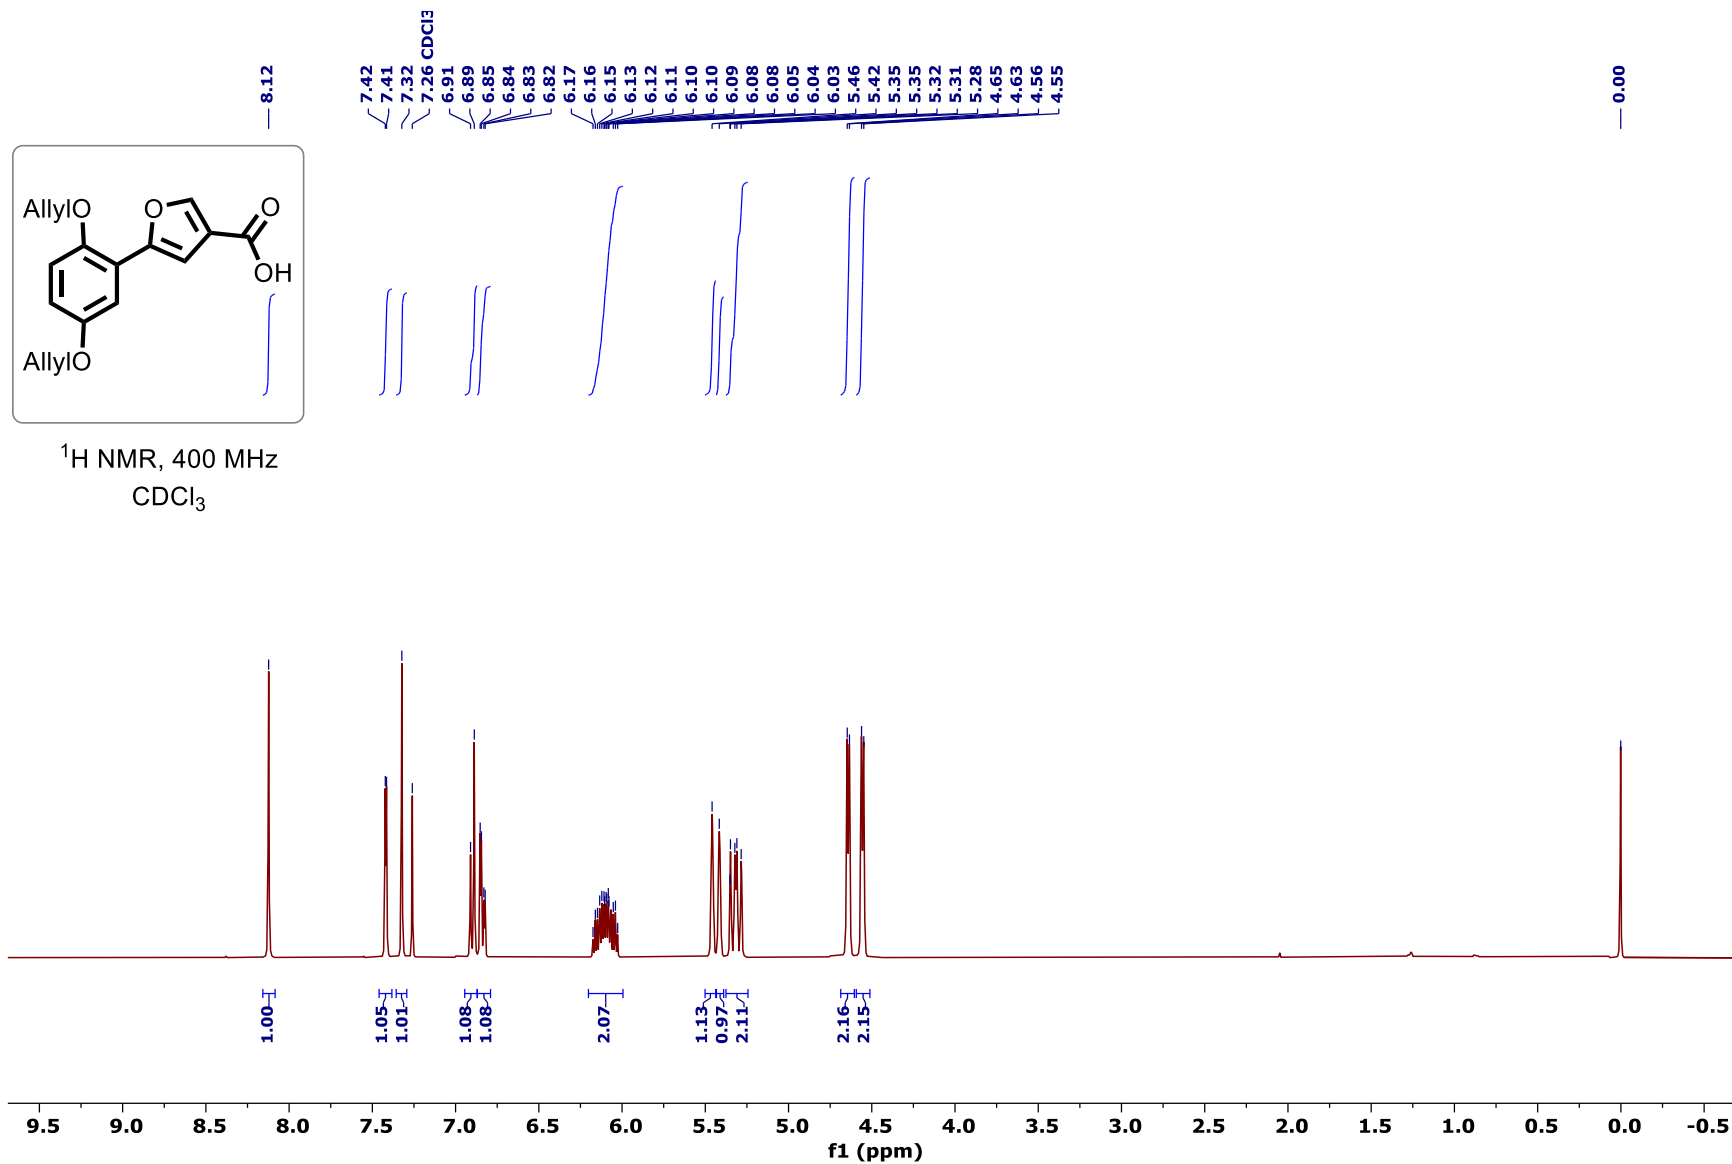

$^{13}\text{C}$  NMR spectrum of 5-(2,5-bis(allyloxy)phenyl)furan-3-carboxylic acid (27):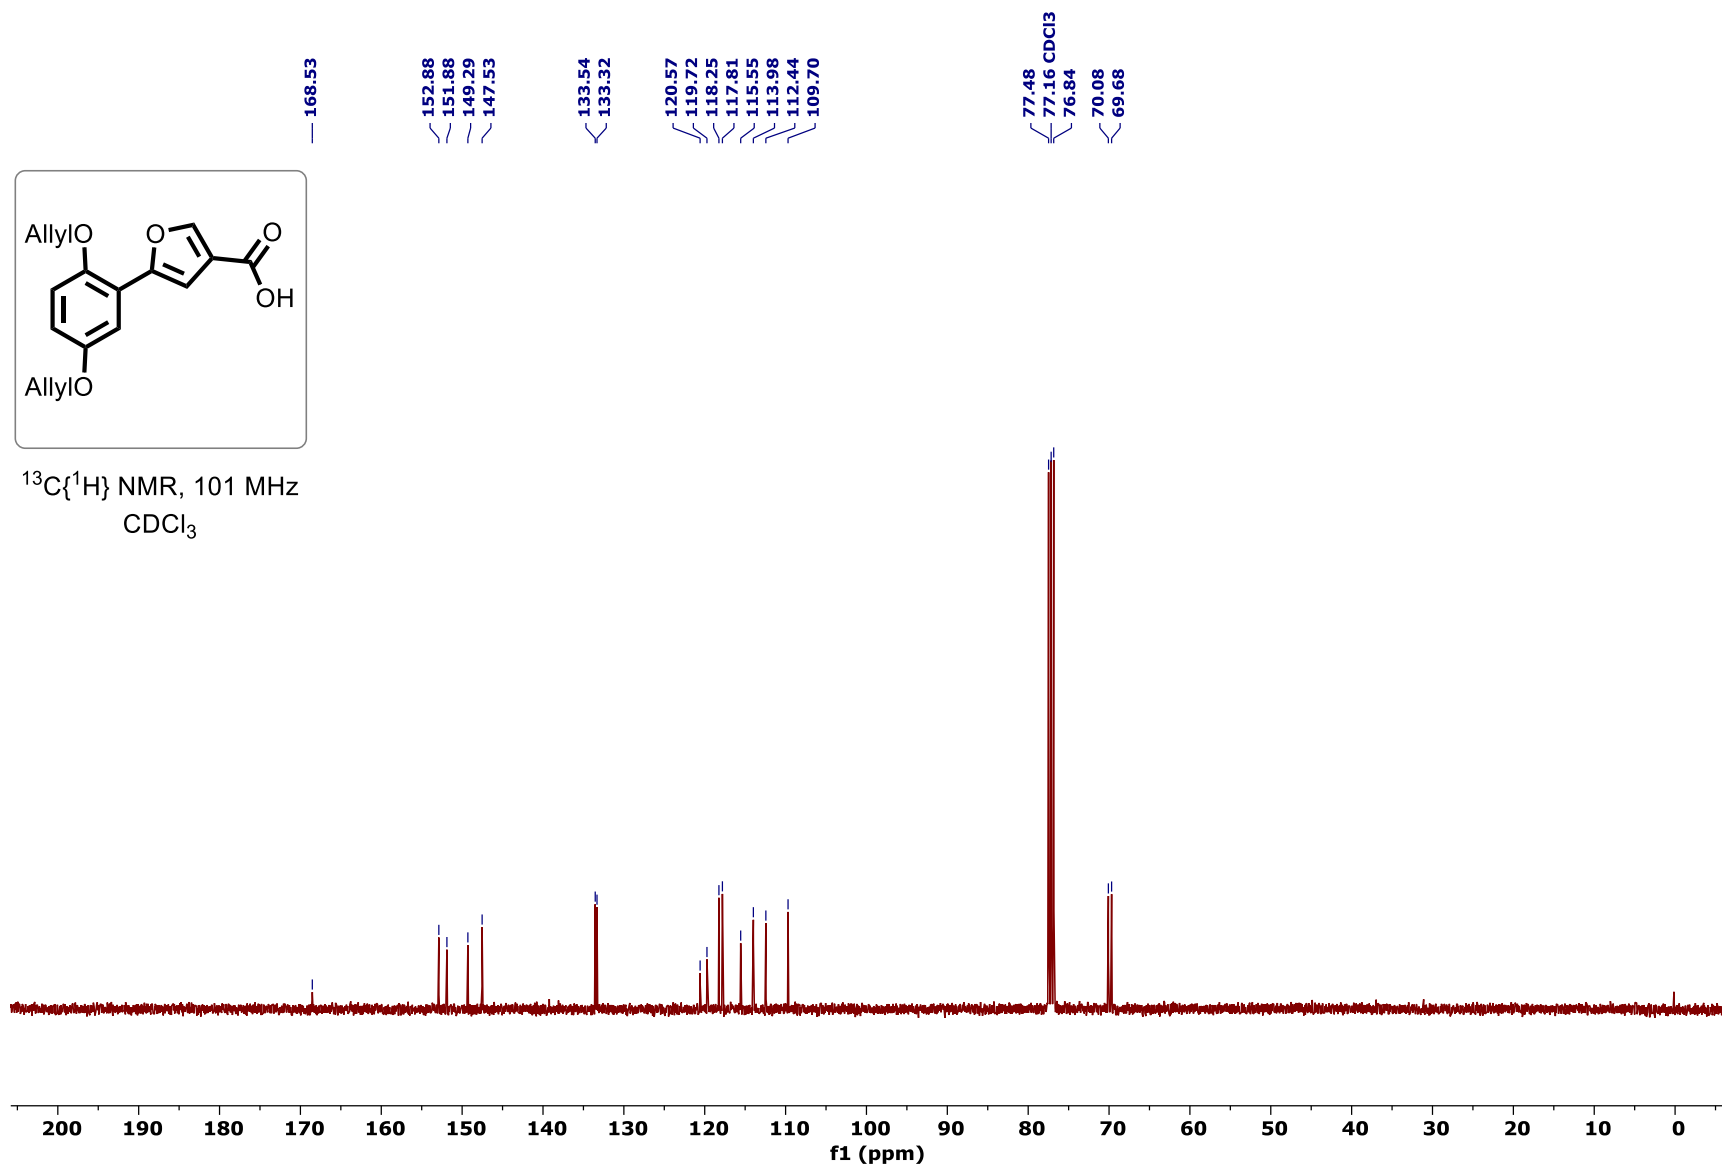

$^1\text{H}$  NMR spectrum of tournefolin C (6):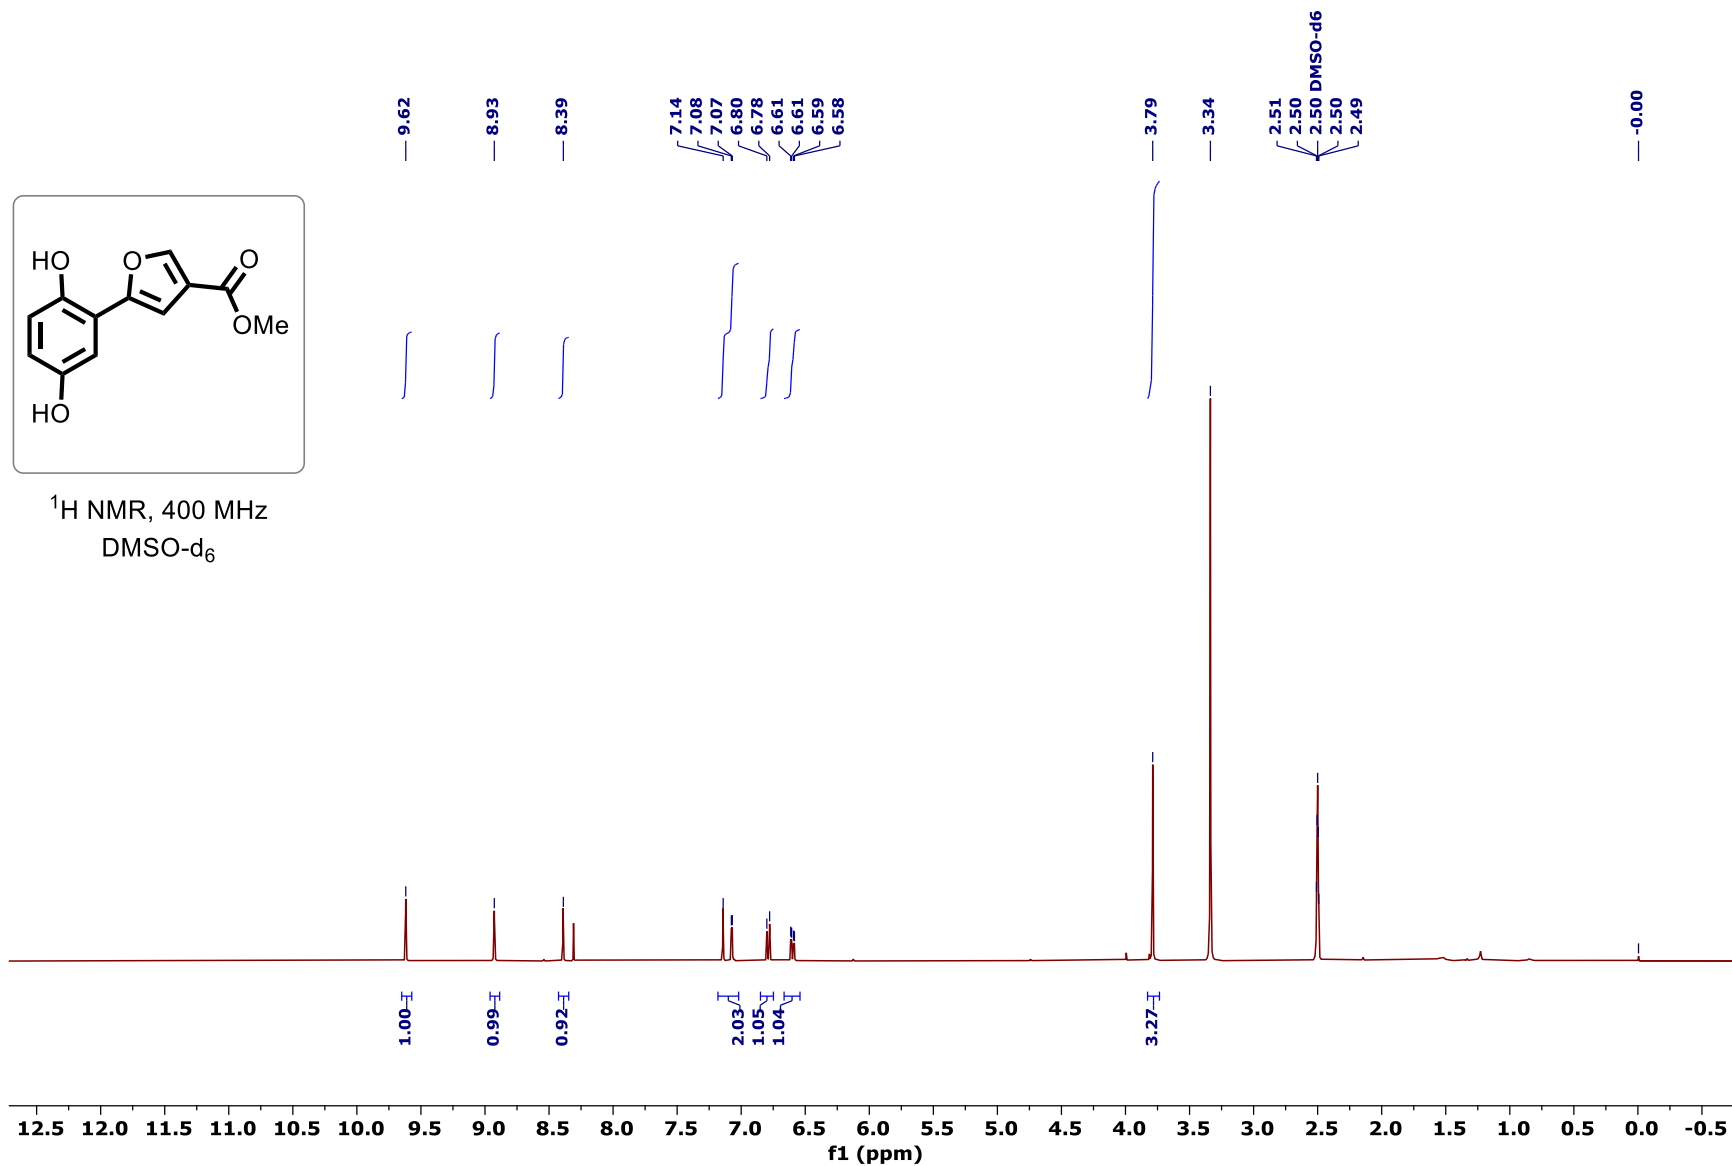



**$^{13}\text{C}$  NMR spectrum of tournefolin C (6):**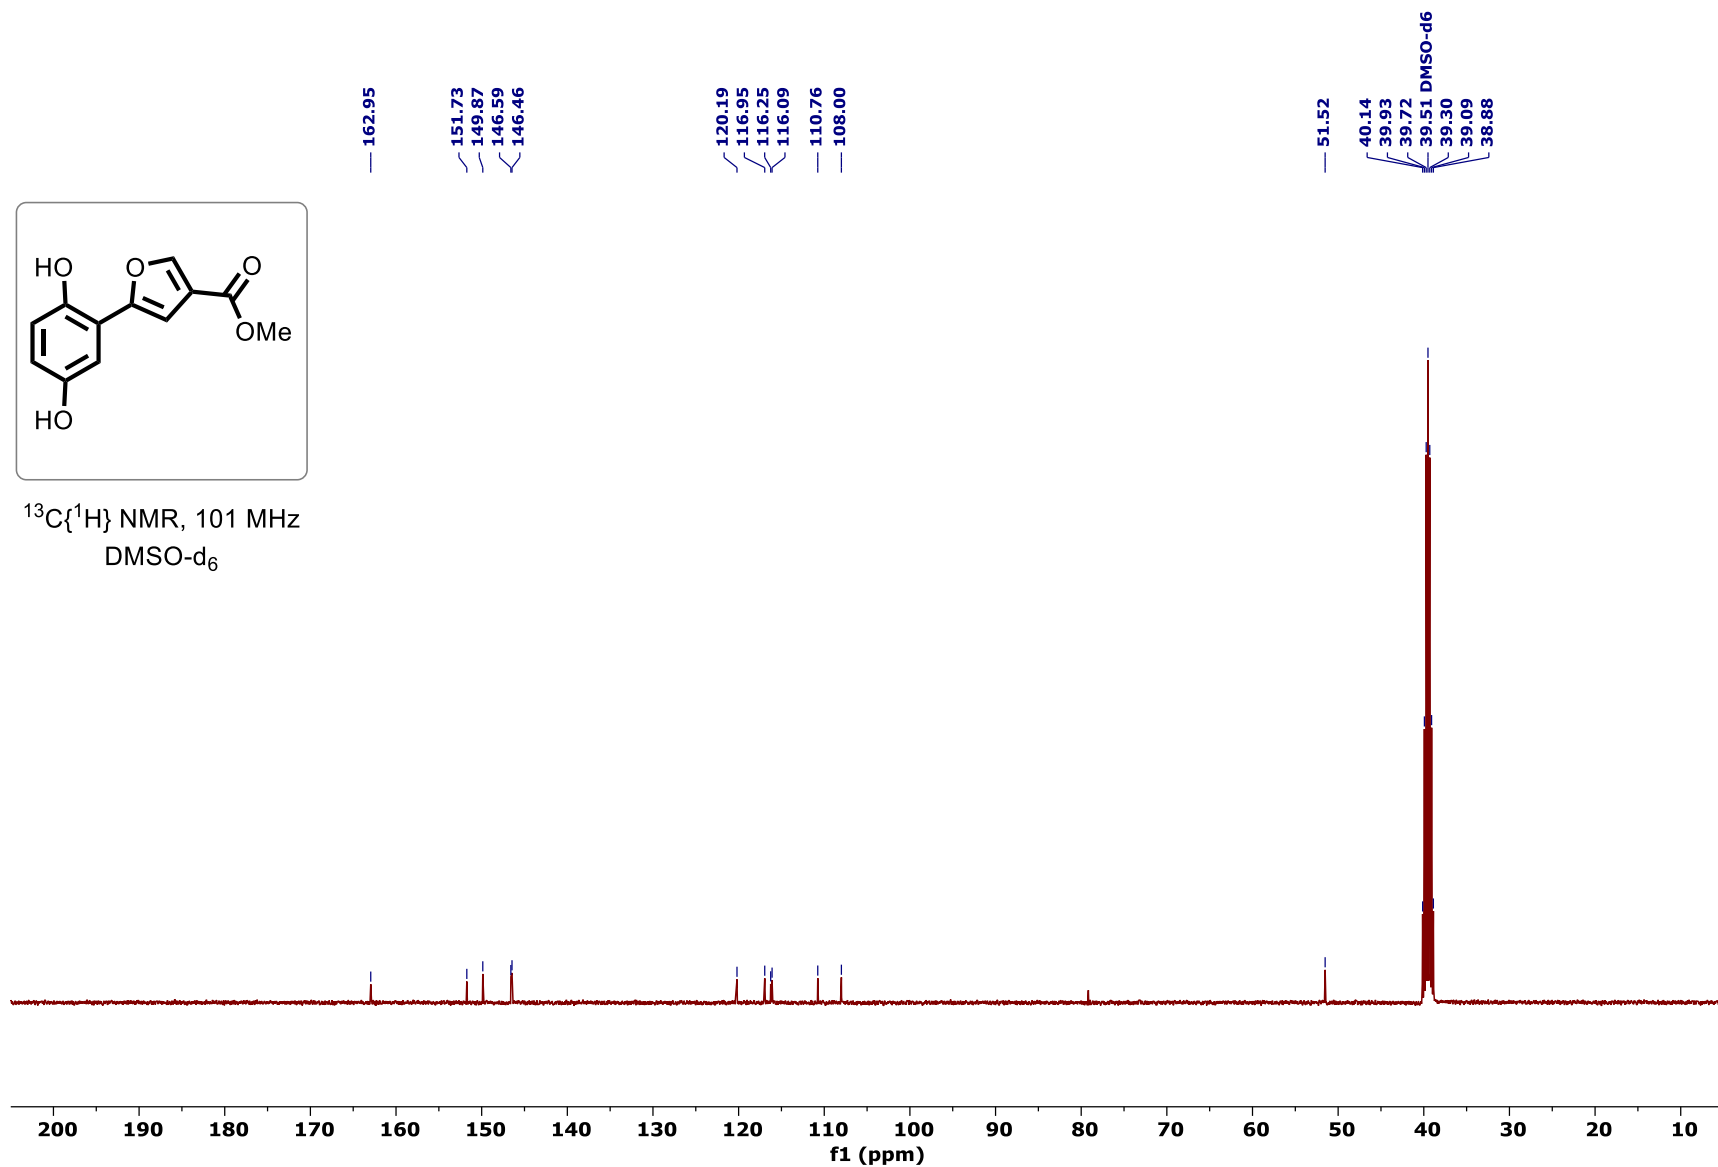

**<sup>1</sup>H NMR spectrum of 1-(5-(2,5-bis(allyloxy)phenyl)furan-3-yl)-4-methylpent-3-en-1-yl acetate [(S)-29]:**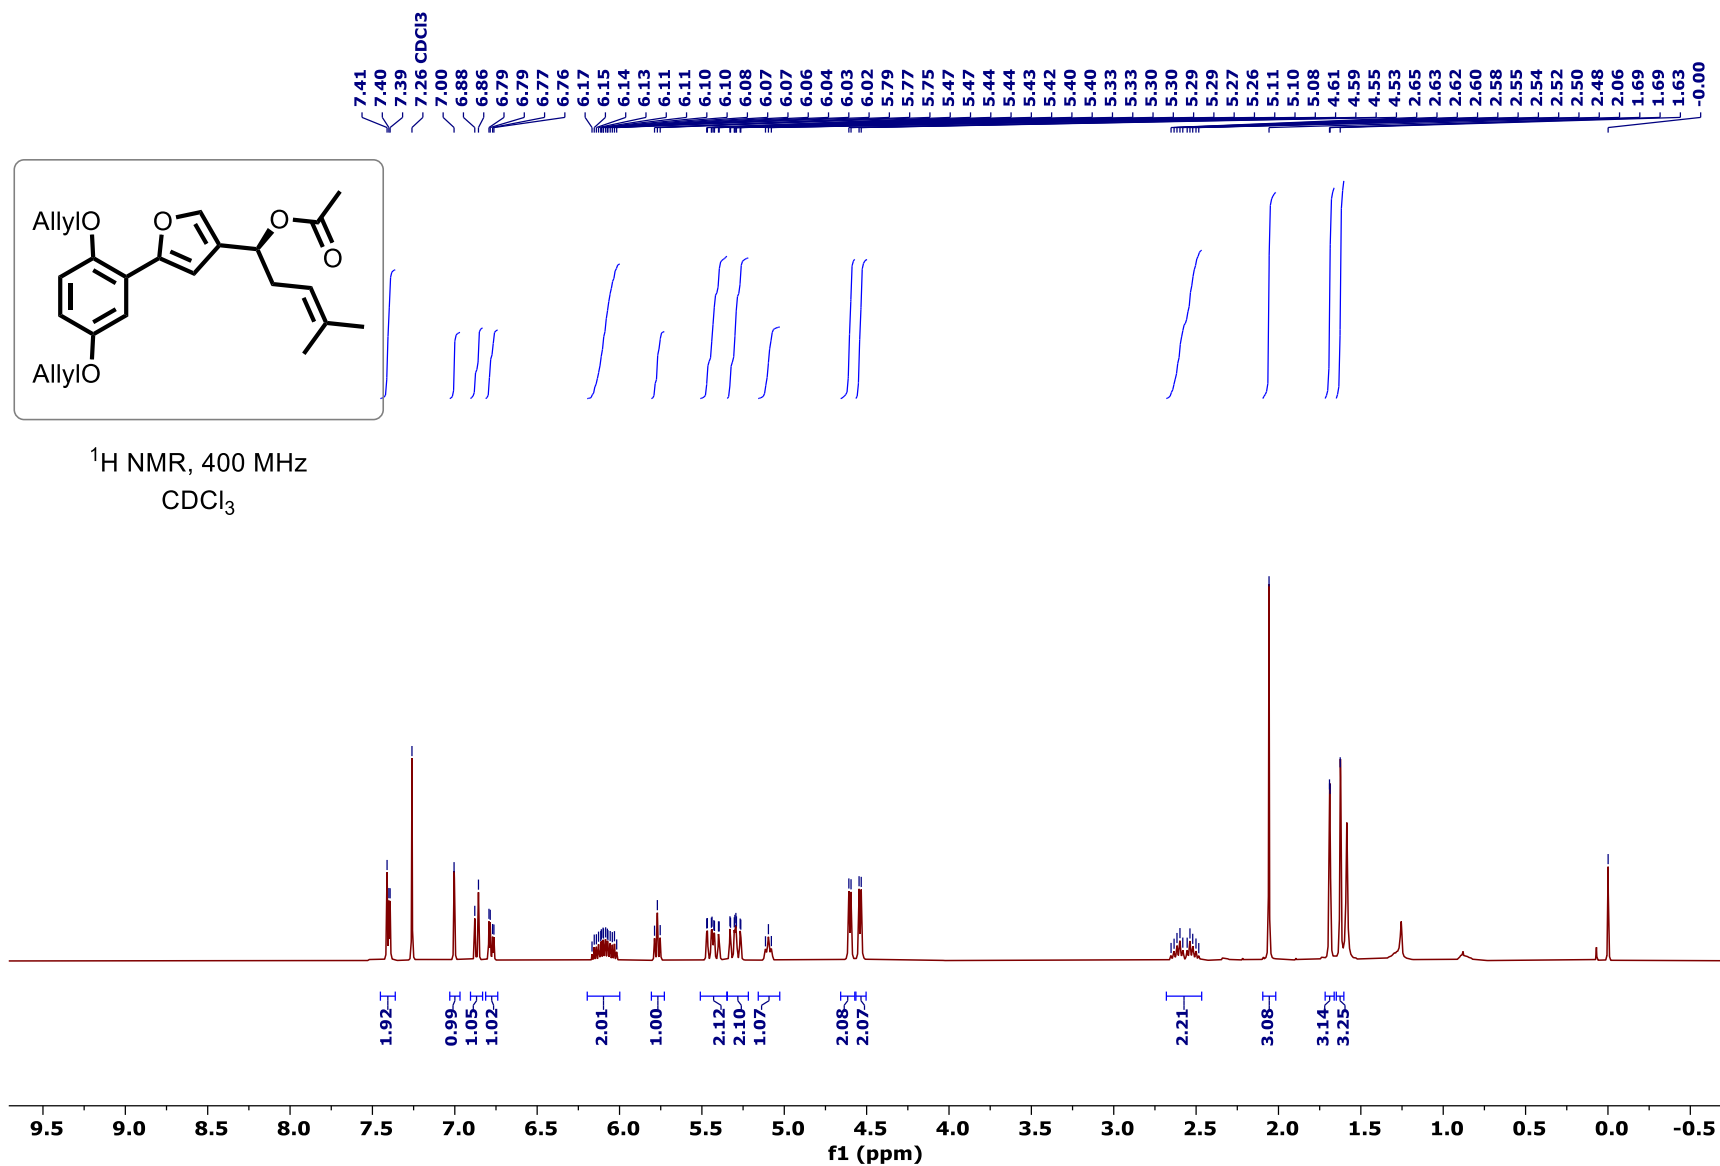

**$^{13}\text{C}$  NMR spectrum of 1-(5-(2,5-bis(allyloxy)phenyl)furan-3-yl)-4-methylpent-3-en-1-yl acetate [(S)-29]:**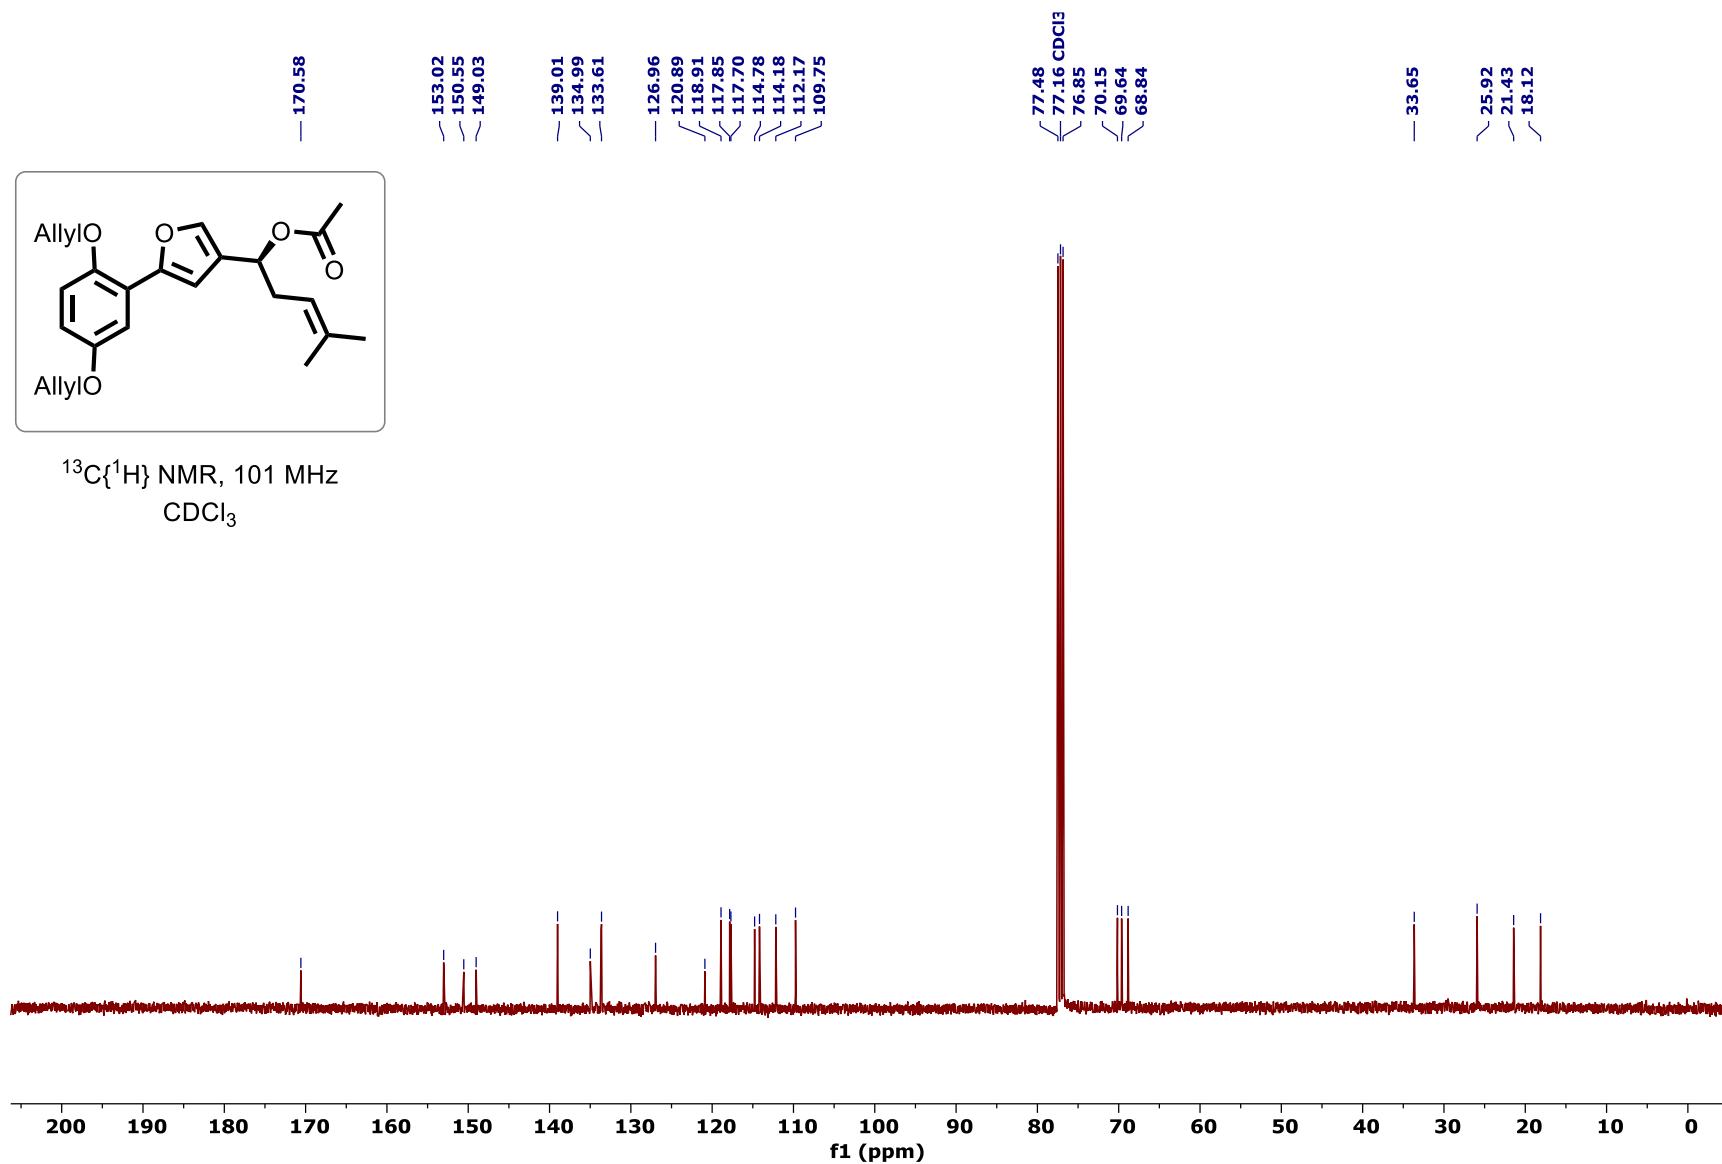

$^1\text{H}$  NMR spectrum of shikonofuran A [(S)-(7)]: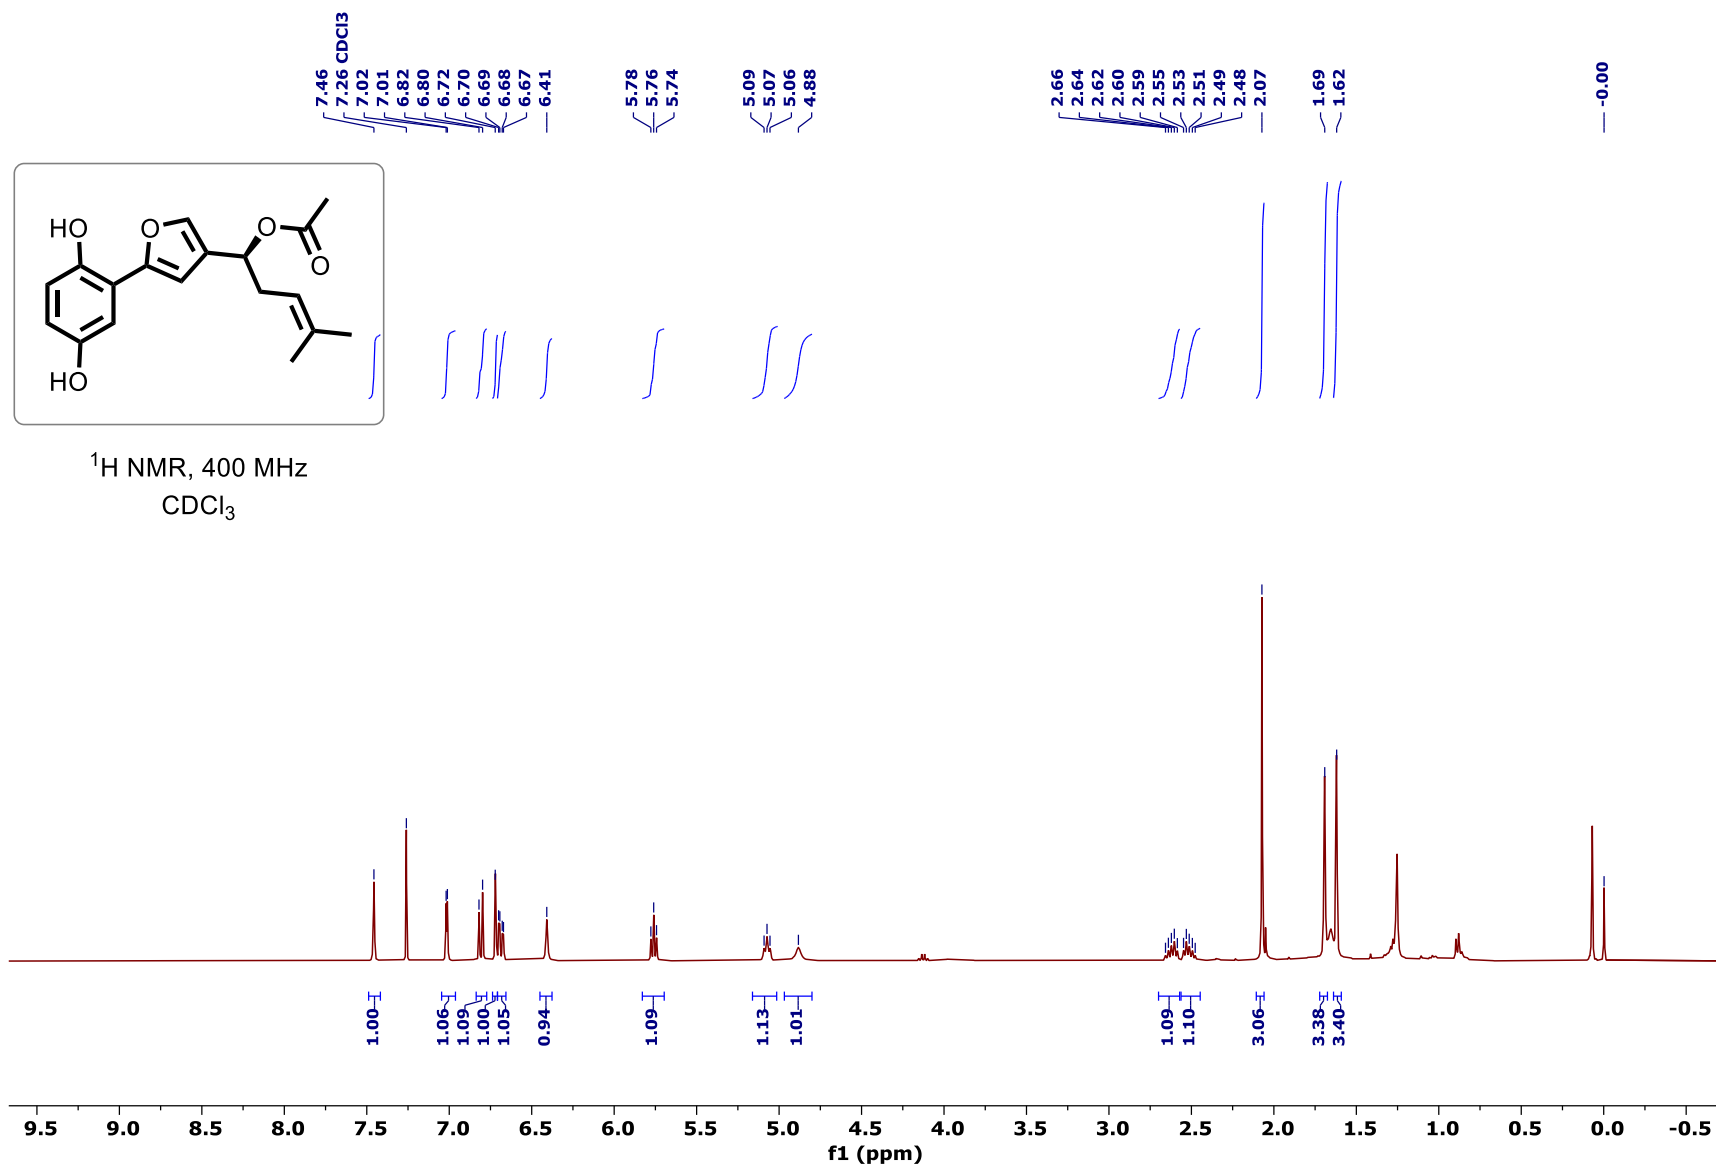

$^{13}\text{C}$  NMR spectrum of shikonofuran A [(S)-(7)] :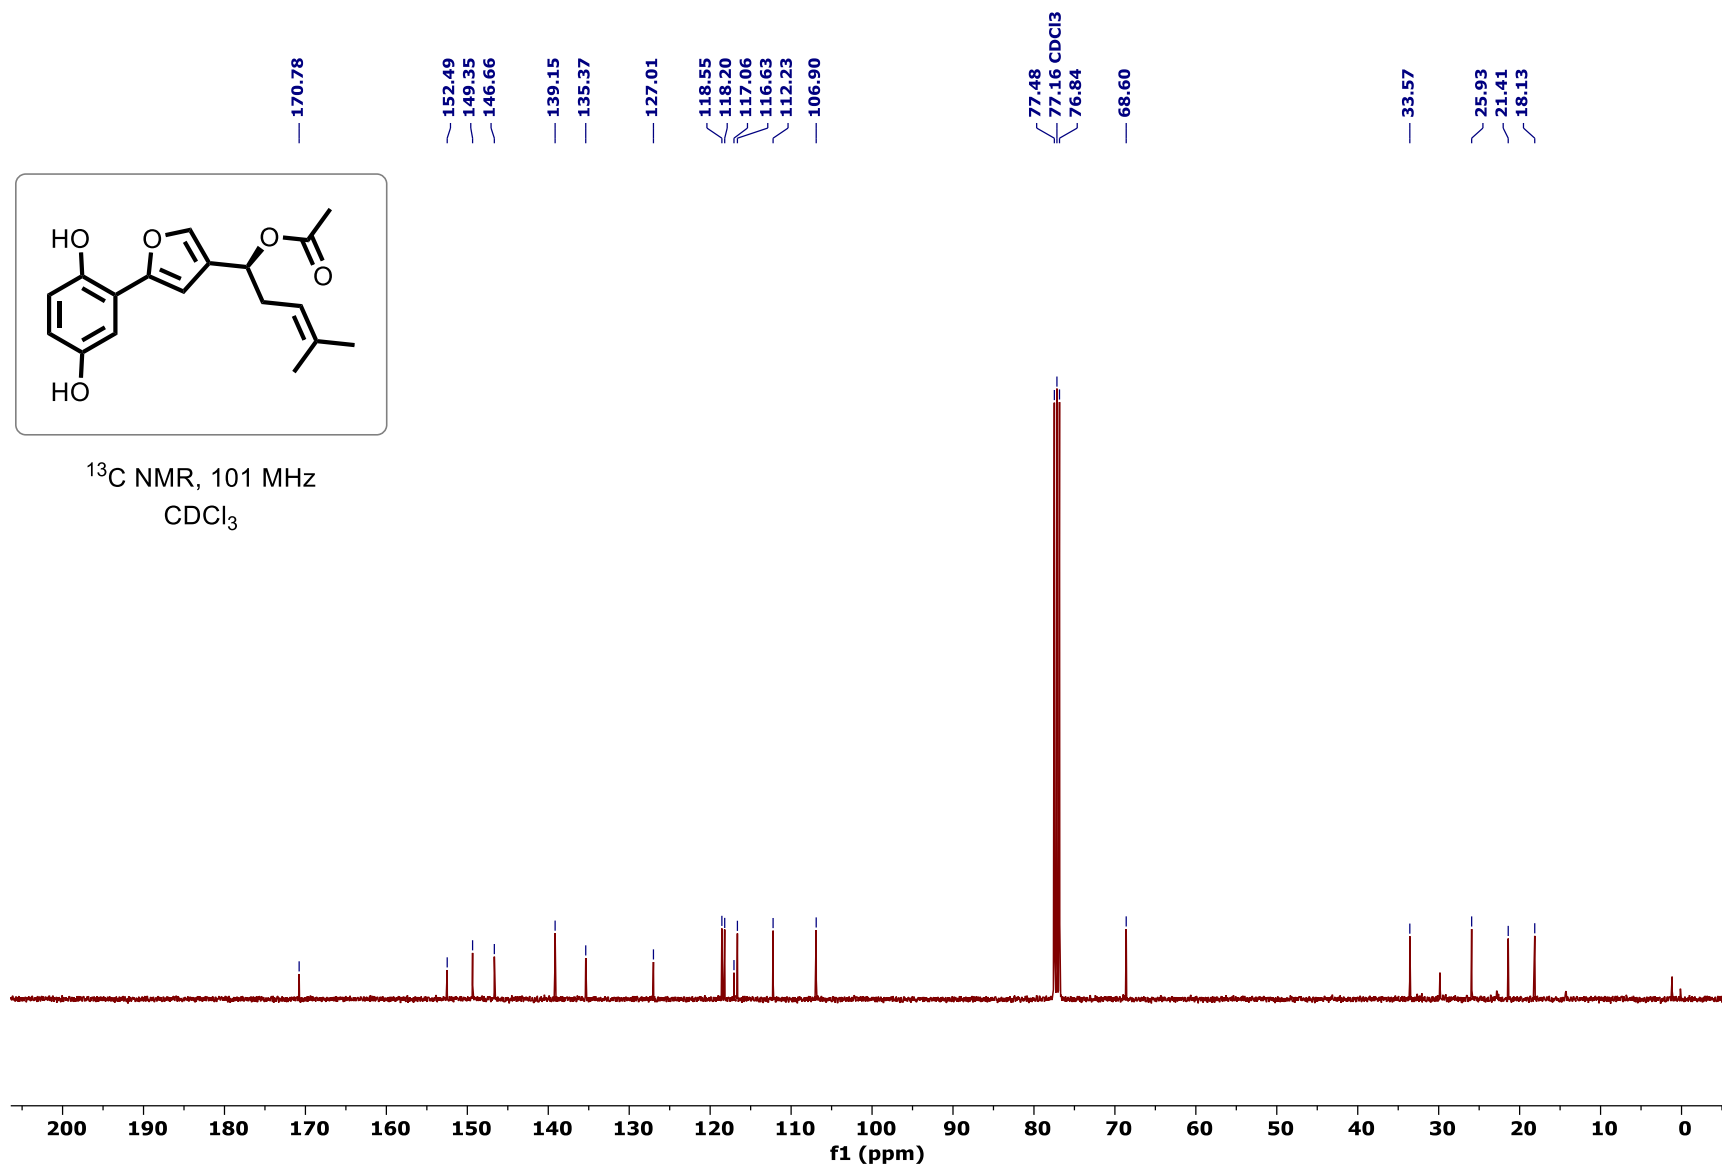

**<sup>1</sup>H NMR spectrum of 1-(5-(2,5-bis(allyloxy)phenyl)furan-3-yl)-4-methylpent-3-en-1-yl 2-methylbutanoate (31):**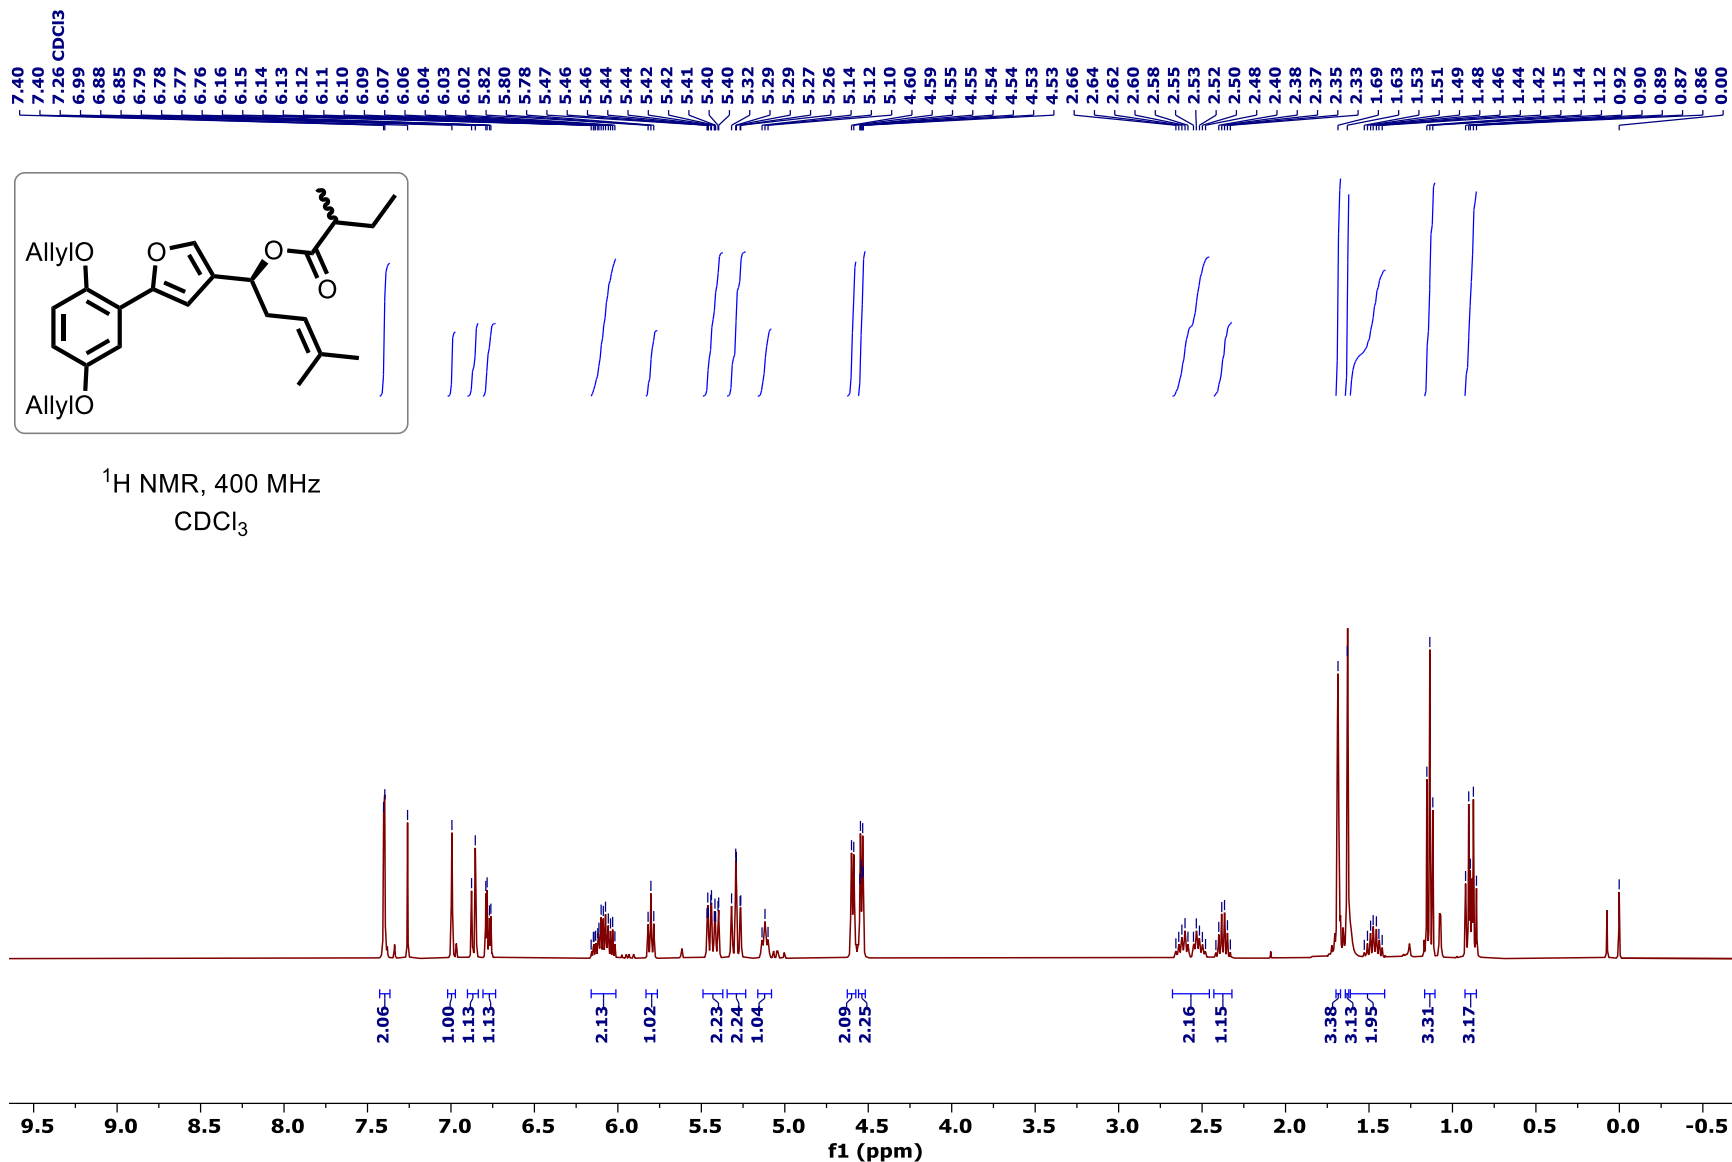

**<sup>13</sup>C NMR spectrum of 1-(5-(2,5-bis(allyloxy)phenyl)furan-3-yl)-4-methylpent-3-en-1-yl 2-methylbutanoate (31):**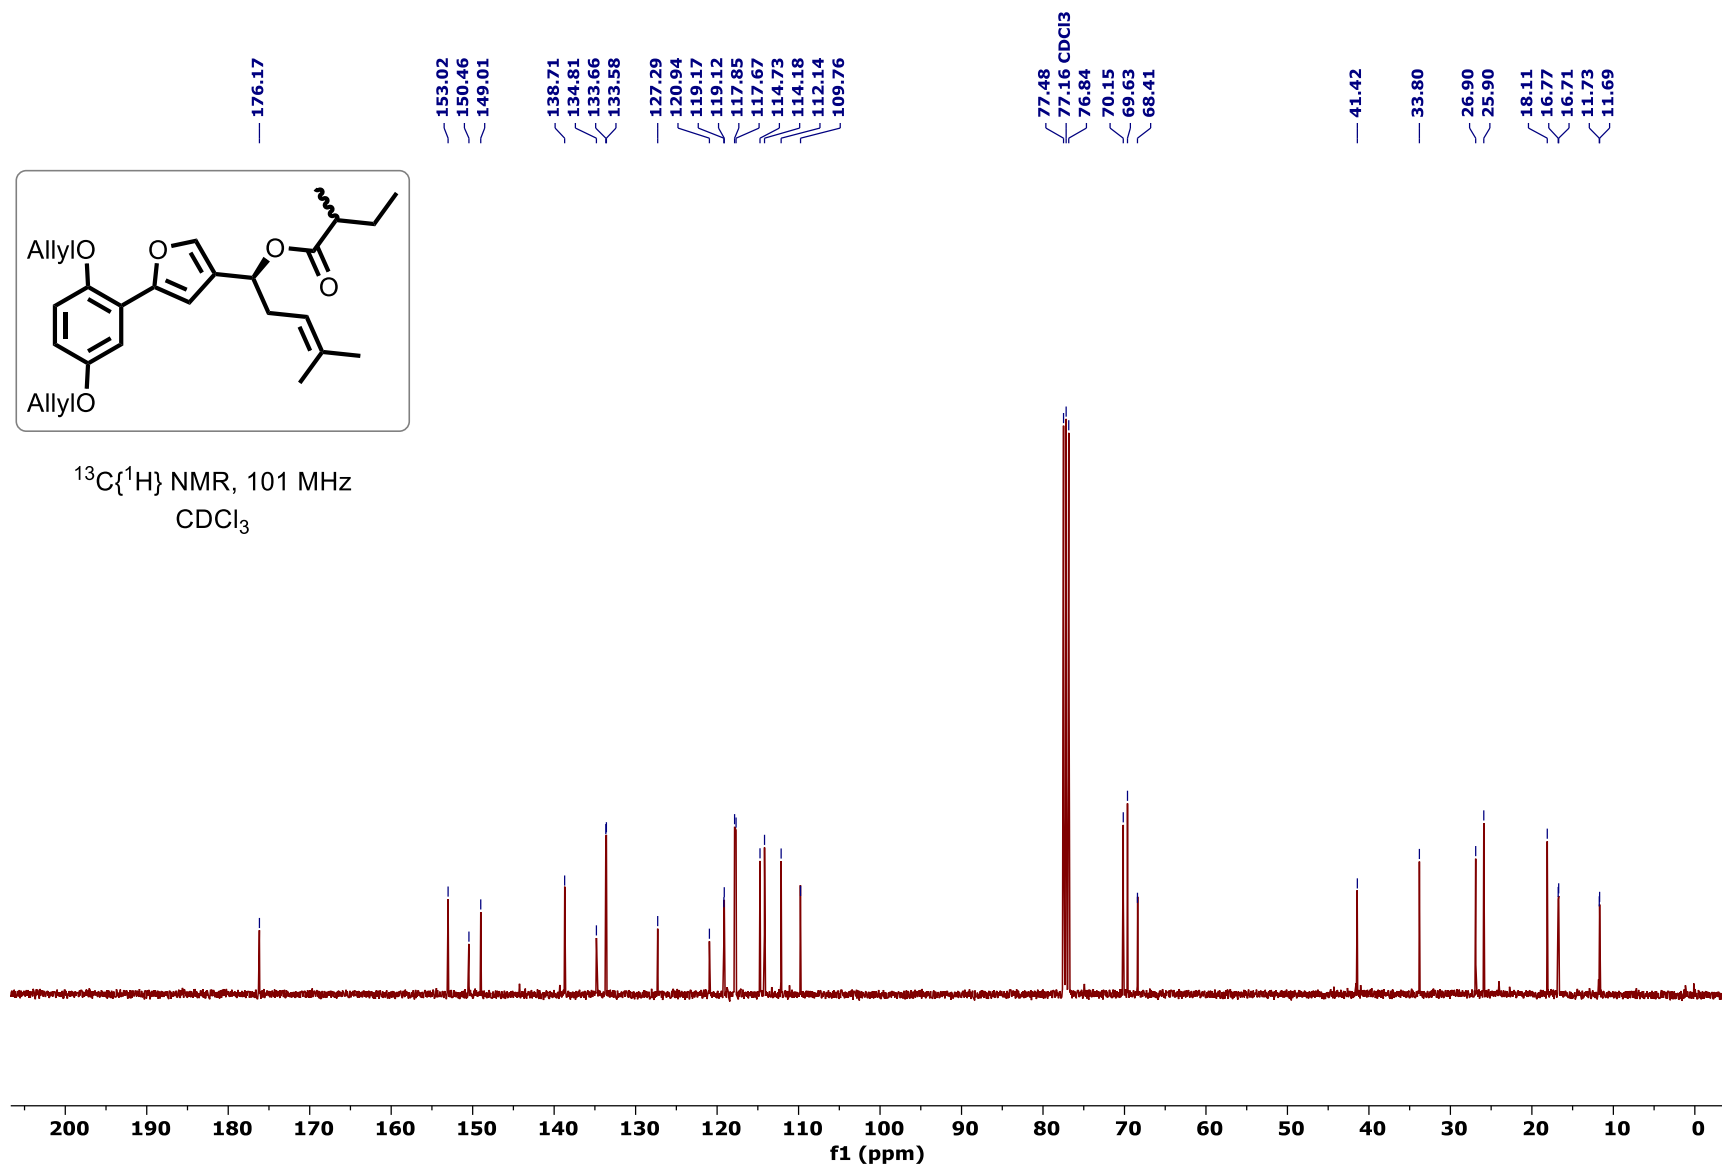

**<sup>1</sup>H NMR spectrum of shikonofuran B (8):**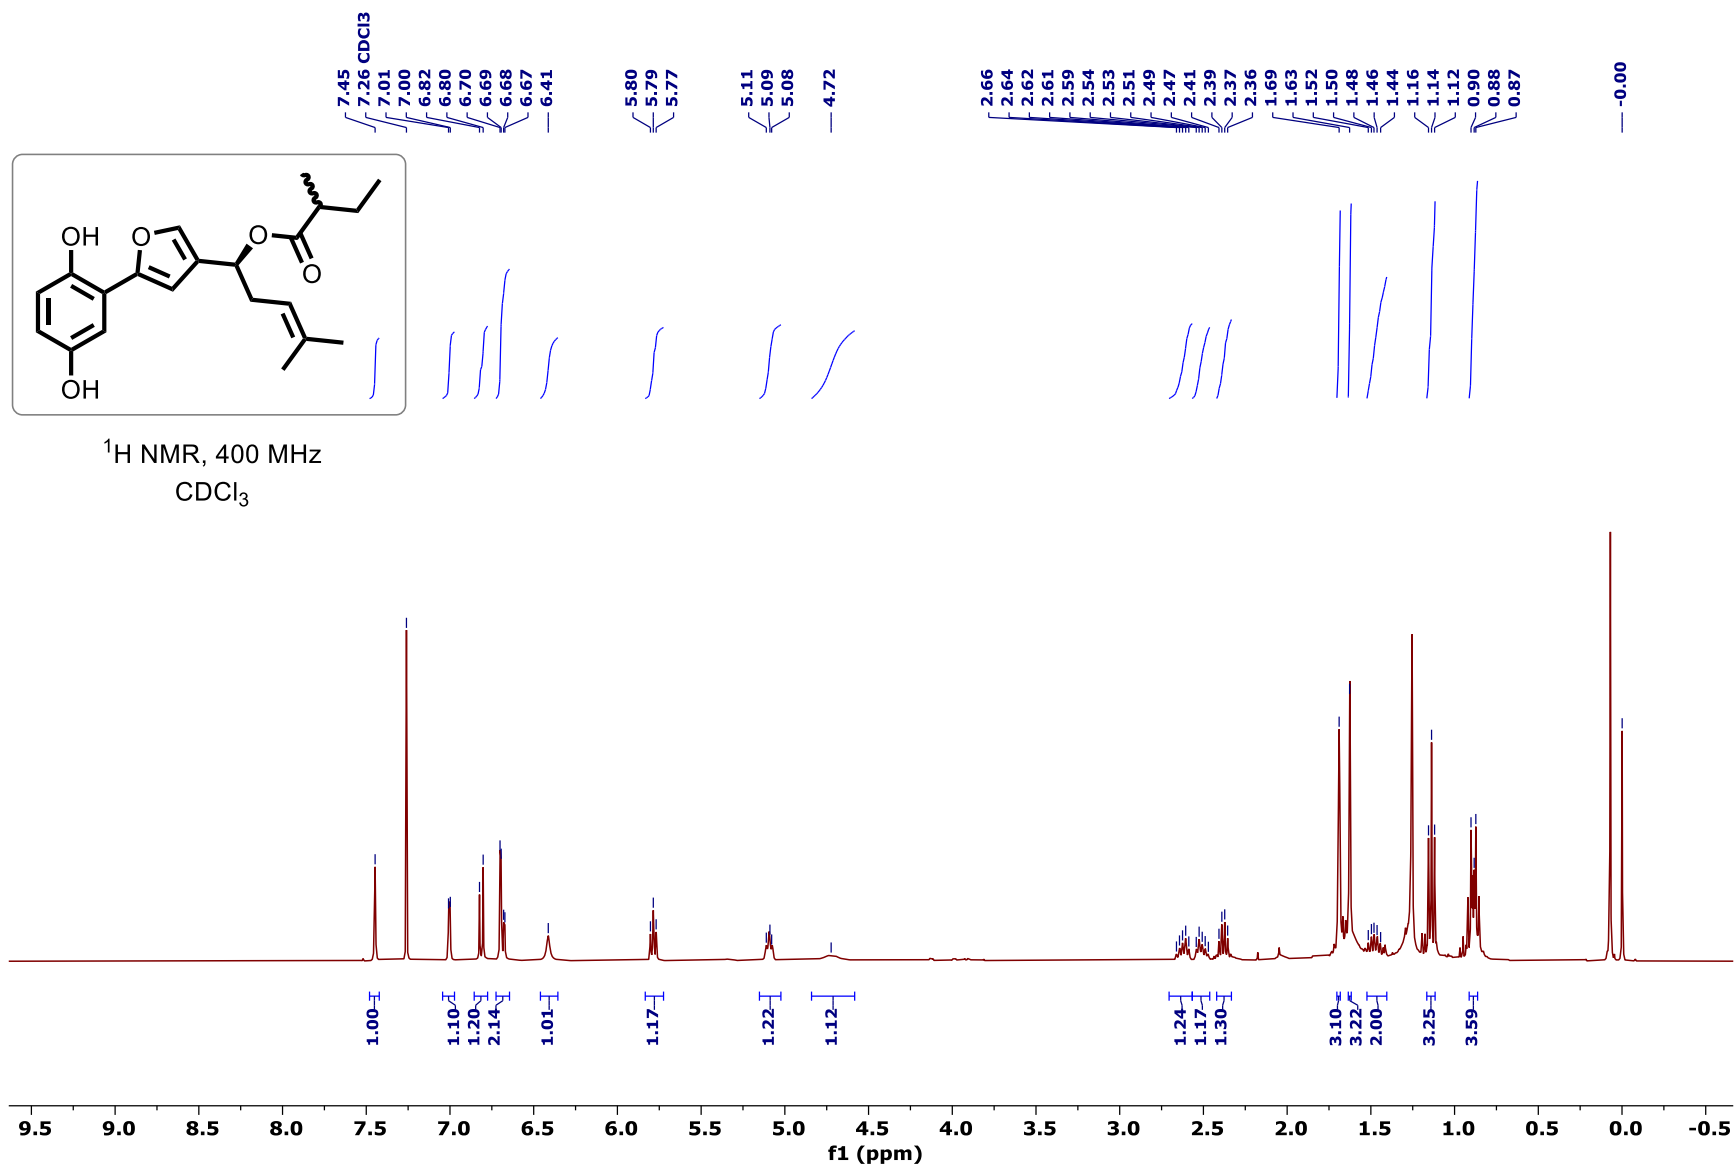



$^{13}\text{C}$  NMR spectrum of shikonofuran B (8):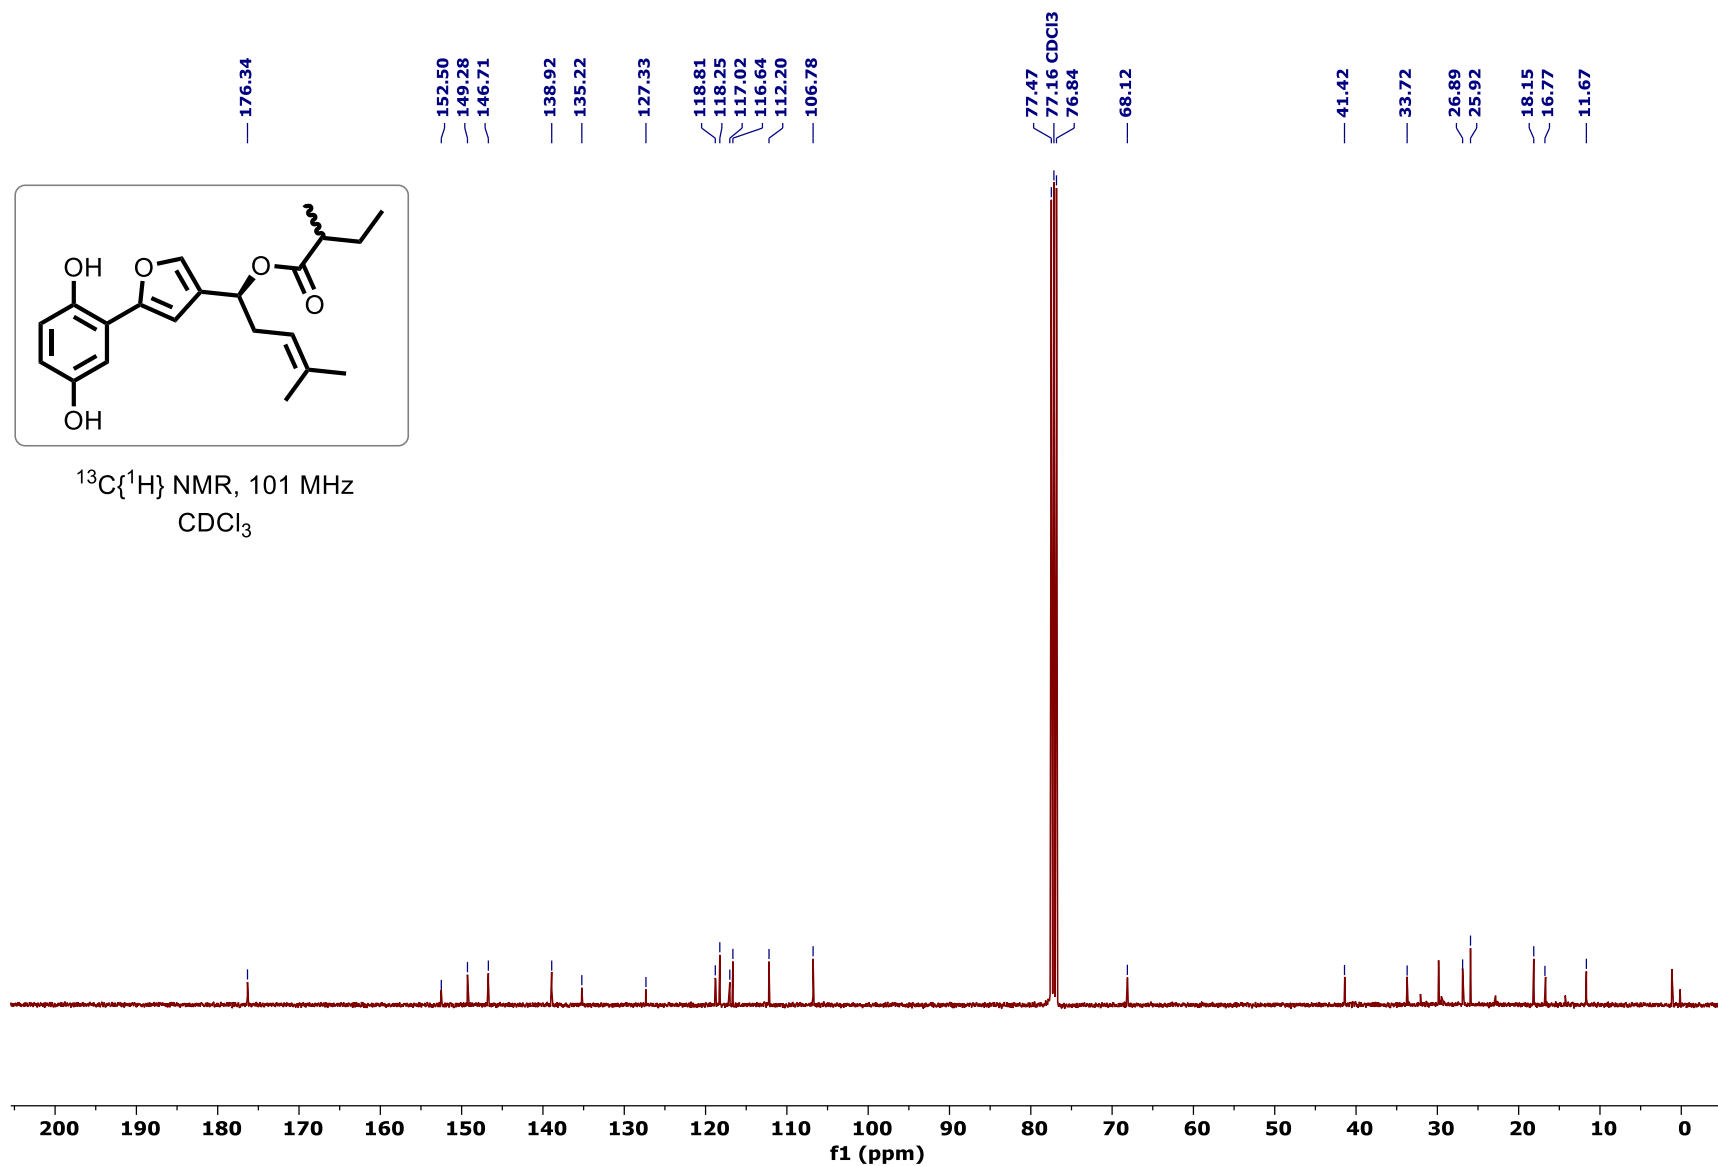

Supplement: d3ob01924a1.pdf [file d3ob01924a1.pdf]
